# Supplementary material for: Nintedanib inhibits the VEGFR-ERK signaling pathway in human KRAS-mutated cancer cells
Source: Research Square preprint supplement (doi:10.21203/rs.3.rs-8370175/v1), 2025-12-18
Supplement: Supplementary file 1 [file 2054cfcbfb19195e23606e2b.docx]

| Table S3. Effect of 1374 inhibitors on the proliferation of *KRAS* mutants and *KRAS*WT cells | | | | | | | | |  |  |
| --- | --- | --- | --- | --- | --- | --- | --- | --- | --- | --- |
| **No** | **Cat.No** | **Product Name** | **Target** | **Sachi**  **(% cells)** | **Sachi-*KRAS*G12A**  **(% cells)** | **HPNE**  **(%cells)** | **HPNE-KRASG12D**  **(% cells)** |
| 1 | S1003 | Linifanib (ABT-869) | CSF-1R, PDGFR, VEGFR | 95.2 | 101.9 | 99.4 | 86.8 |
| 2 | S1415 | Clopidogrel | P2 Receptor | 88.2 | 92.5 | 108.4 | 96.6 |
| 3 | S1013 | Bortezomib (PS-341) | Proteasome | 12.9 | 9.6 | 84.8 | 47.7 |
| 4 | S1438 | Topiramate | Carbonic Anhydrase | 73.1 | 93.5 | 114.2 | 95.3 |
| 5 | S1033 | Nilotinib (AMN-107) | Bcr-Abl | 89.7 | 92.8 | 106.8 | 76.8 |
| 6 | S1456 | Zibotentan (ZD4054) | Endothelin Receptor | 88.2 | 82.7 | 116.9 | 88.4 |
| 7 | S1053 | Entinostat (MS-275) | HDAC | 26.3 | 20.7 | 113.3 | 81.0 |
| 8 | S1475 | Pimasertib (AS-703026) | MEK | 54.2 | 70.2 | 99.7 | 98.5 |
| 9 | S1087 | Iniparib (BSI-201) | PARP | 26.2 | 14.9 | 110.8 | 108.6 |
| 10 | S1497 | Pralatrexate | DHFR | 28.2 | 19.3 | 149.5 | 87.1 |
| 11 | S1119 | Cabozantinib (XL184, BMS-907351) | c-Met, VEGFR | 26.6 | 19.0 | 126.0 | 91.4 |
| 12 | S1514 | Cyclosporine | phosphatase, Immunology & Inflammation related | 13.3 | 9.7 | 45.6 | 34.9 |
| 13 | S1147 | Barasertib (AZD1152-HQPA) | Aurora Kinase | 24.0 | 18.1 | 89.0 | 61.2 |
| 14 | S1549 | Nebivolol HCl | Adrenergic Receptor | 15.1 | 10.9 | 34.8 | 21.9 |
| 15 | S1164 | Lenvatinib (E7080) | VEGFR | 24.6 | 18.5 | 104.9 | 80.2 |
| 16 | S1578 | Candesartan | RAAS | 29.0 | 20.2 | 127.7 | 92.0 |
| 17 | S1194 | CUDC-101 | EGFR, HDAC, HER2 | 27.7 | 20.2 | 96.6 | 66.2 |
| 18 | S1607 | Rizatriptan Benzoate | 5-HT Receptor | 108.6 | 105.0 | 107.6 | 93.5 |
| 19 | S1204 | Melatonin | MT Receptor | 103.8 | 104.0 | 110.2 | 96.6 |
| 20 | S1620 | Darunavir Ethanolate | HIV Protease | 30.1 | 19.5 | 108.8 | 74.2 |
| 21 | S1218 | Clofarabine | DNA/RNA Synthesis | 19.5 | 12.5 | 95.2 | 137.0 |
| 22 | S1630 | Allopurinol | ROS | 92.0 | 99.4 | 114.5 | 83.1 |
| 23 | S1230 | Flavopiridol (Alvocidib) | CDK | 23.0 | 15.0 | 101.5 | 89.8 |
| 24 | S1641 | Chlorothiazide | Others | 98.2 | 95.5 | 110.1 | 84.6 |
| 25 | S1252 | Entecavir Hydrate | Reverse Transcriptase | 58.4 | 42.3 | 99.0 | 74.7 |
| 26 | S1652 | Monobenzone | Tyrosinase | 44.8 | 38.8 | 114.8 | 92.0 |
| 27 | S1262 | Avagacestat  (BMS-708163) | Beta Amyloid, Gamma-secretase | 88.9 | 99.9 | 110.9 | 97.4 |
| 28 | S1666 | Flucytosine | Anti-infection | 93.0 | 100.0 | 113.6 | 86.0 |
| 29 | S1283 | Asenapine maleate | 5-HT Receptor, Adrenergic Receptor | 50.7 | 68.5 | 89.4 | 65.6 |
| 30 | S1681 | Mesalamine | IκB/IKK, Immunology & Inflammation related | 30.1 | 23.3 | 109.7 | 84.3 |
| 31 | S1299 | Floxuridine | DNA/RNA Synthesis | 15.5 | 10.9 | 88.6 | 59.4 |
| 32 | S1693 | Carbamazepine | Sodium Channel,Autophagy | 27.2 | 19.0 | 109.4 | 86.5 |
| 33 | S1326 | Edaravone | Others | 24.0 | 16.6 | 110.5 | 87.4 |
| 34 | S1709 | Estradiol | Estrogen/progestogen Receptor | 44.8 | 32.2 | 117.2 | 83.1 |
| 35 | S1336 | Fluvoxamine maleate | 5-HT Receptor | 36.7 | 23.4 | 104.9 | 66.7 |
| 36 | S1721 | Azathioprine | Rho | 36.2 | 25.8 | 91.3 | 65.8 |
| 37 | S1358 | Loratadine | Histamine Receptor | 95.3 | 80.4 | 93.5 | 80.1 |
| 38 | S1734 | Meloxicam | COX | 116.7 | 106.3 | 115.4 | 81.0 |
| 39 | S1374 | Doripenem Hydrate | Anti-infection | 115.8 | 107.3 | 112.1 | 77.4 |
| 40 | S1742 | Nevirapine | Reverse Transcriptase | 82.8 | 88.4 | 115.6 | 83.6 |
| 41 | S1386 | Nafamostat Mesylate | Serine Protease | 106.5 | 110.1 | 43.4 | 34.3 |
| 42 | S1760 | Rifapentine | DNA/RNA Synthesis | 80.7 | 94.7 | 137.7 | 90.9 |
| 43 | S1398 | Stavudine (d4T) | Reverse Transcriptase | 90.2 | 77.1 | 102.8 | 72.0 |
| 44 | S1773 | Oxytetracycline (Terramycin) | Anti-infection | 44.8 | 97.1 | 88.5 | 56.9 |
| 45 | S1004 | Veliparib (ABT-888) | PARP | 92.4 | 89.8 | 102.7 | 83.9 |
| 46 | S1425 | Ranolazine 2HCl | Calcium Channel | 88.8 | 108.3 | 103.2 | 77.6 |
| 47 | S1017 | Cediranib (AZD2171) | VEGFR | 45.6 | 16.4 | 73.5 | 46.8 |
| 48 | S1439 | Tranilast | Immunology & Inflammation related | 62.9 | 73.7 | 108.7 | 77.3 |
| 49 | S1035 | Pazopanib HCl (GW786034 HCl) | c-Kit,PDGFR,VEGFR | 71.9 | 90.4 | 85.7 | 60.0 |
| 50 | S1457 | Atazanavir Sulfate | HIV Protease | 100.6 | 101.3 | 107.1 | 77.2 |
| 51 | S1055 | Enzastaurin (LY317615) | PKC | 94.9 | 103.3 | 106.7 | 80.5 |
| 52 | S1480 | Lomibuvir (VX-222, VCH-222) | HCV Protease | 11.6 | 17.7 | 101.0 | 80.5 |
| 53 | S1090 | Abexinostat (PCI-24781) | HDAC | 26.5 | 20.9 | 90.9 | 64.1 |
| 54 | S1500 | Betamethasone | Glucocorticoid Receptor | 45.5 | 77.8 | 104.4 | 93.8 |
| 55 | S1120 | Everolimus (RAD001) | mTOR | 24.6 | 30.4 | 80.7 | 75.5 |
| 56 | S1515 | Pracinostat (SB939) | HDAC | 26.0 | 19.7 | 93.4 | 63.8 |
| 57 | S1148 | Docetaxel | Microtubule Associated | 31.8 | 20.3 | 94.8 | 67.9 |
| 58 | S1550 | Pimobendan | PDE | 88.5 | 98.8 | 97.1 | 72.9 |
| 59 | S1168 | Valproic acid sodium salt (Sodium valproate) | GABA Receptor,HDAC,Autophagy | 109.3 | 108.2 | 90.5 | 74.5 |
| 60 | S1593 | Apixaban | Factor Xa | 107.7 | 105.9 | 103.7 | 74.3 |
| 61 | S1195 | TAK-700 (Orteronel) | P450 (e.g. CYP17) | 105.2 | 107.8 | 98.9 | 74.2 |
| 62 | S1608 | Pyridostigmine Bromide | AChR | 106.9 | 106.8 | 103.0 | 156.6 |
| 63 | S1206 | Bisoprolol fumarate | Adrenergic Receptor | 104.2 | 105.0 | 105.5 | 79.7 |
| 64 | S1622 | Prednisone | Glucocorticoid Receptor,Immunology & Inflammation related | 111.1 | 113.6 | 114.5 | 78.4 |
| 65 | S1221 | Dacarbazine | DNA/RNA Synthesis | 51.3 | 59.0 | 73.9 | 80.6 |
| 66 | S1631 | Allopurinol Sodium | ROS | 92.9 | 97.0 | 99.9 | 73.0 |
| 67 | S1231 | Topotecan HCl | Topoisomerase | 23.8 | 16.4 | 112.7 | 77.3 |
| 68 | S1643 | Ursodiol | Others | 94.1 | 100.0 | 103.3 | 76.0 |
| 69 | S1255 | Nepafenac | COX | 97.9 | 91.7 | 103.3 | 88.4 |
| 70 | S1653 | Tretinoin | Retinoid Receptor | 34.4 | 69.3 | 99.1 | 91.9 |
| 71 | S1267 | Vemurafenib (PLX4032, RG7204) | Raf | 38.2 | 52.2 | 101.5 | 71.1 |
| 72 | S1667 | Trichlormethiazide | Others | 81.6 | 91.8 | 106.4 | 87.7 |
| 73 | S1284 | Benazepril HCl | RAAS | 106.7 | 106.5 | 99.8 | 85.5 |
| 74 | S1683 | Ipratropium Bromide | AChR | 66.3 | 87.4 | 97.9 | 74.0 |
| 75 | S1300 | Tegafur (FT-207, NSC 148958) | DNA/RNA Synthesis | 111.5 | 98.2 | 112.0 | 77.4 |
| 76 | S1696 | Hydrocortisone | Glucocorticoid Receptor | 55.0 | 75.3 | 115.5 | 88.2 |
| 77 | S1328 | Etodolac | COX | 35.6 | 44.9 | 110.6 | 79.2 |
| 78 | S1712 | Deferasirox | P450 (e.g. CYP17) | 23.5 | 15.7 | 114.8 | 80.3 |
| 79 | S1340 | Gatifloxacin | Topoisomerase | 12.7 | 9.1 | 65.5 | 40.1 |
| 80 | S1723 | Indomethacin | COX | 95.1 | 104.2 | 105.8 | 76.8 |
| 81 | S1359 | Losartan Potassium (DuP 753) | RAAS | 113.1 | 106.0 | 96.2 | 77.1 |
| 82 | S1735 | Mesna | Others | 108.7 | 103.5 | 105.7 | 77.2 |
| 83 | S1376 | Gestodene | Estrogen/progestogen Receptor | 107.7 | 100.6 | 100.7 | 75.9 |
| 84 | S1743 | NEXIUM (esomeprazole magnesium) | Proton Pump | 99.6 | 104.7 | 92.8 | 82.7 |
| 85 | S1387 | Naftopidil DiHCl | Adrenergic Receptor | 76.7 | 82.6 | 100.3 | 64.4 |
| 86 | S1761 | Suprofen | COX | 108.8 | 111.1 | 115.3 | 73.4 |
| 87 | S1400 | Tenofovir Disoproxil Fumarate | Reverse Transcriptase | 61.2 | 56.3 | 107.9 | 69.4 |
| 88 | S1774 | Thioguanine | DNA Methyltransferase | 26.9 | 17.3 | 69.2 | 44.4 |
| 89 | S1005 | Axitinib | c-Kit, PDGFR, VEGFR | 55.0 | 28.7 | 91.0 | 72.1 |
| 90 | S1426 | Repaglinide | Potassium Channel | 105.6 | 107.5 | 104.3 | 95.3 |
| 91 | S1018 | Dovitinib (TKI-258, CHIR-258) | cKit, FGFR, FLT3, PDGFR, VEGFR | 42.1 | 18.3 | 56.8 | 24.0 |
| 92 | S1441 | Venlafaxine HCl | 5-HT Receptor | 75.7 | 79.2 | 177.4 | 92.8 |
| 93 | S1039 | Rapamycin (Sirolimus) | Autophagy, Tor | 29.7 | 38.9 | 85.3 | 90.8 |
| 94 | S1465 | Moxifloxacin HCl | Topoisomerase | 59.0 | 74.3 | 56.2 | 52.5 |
| 95 | S1060 | Olaparib (AZD2281, Ku-0059436) | PARP | 68.9 | 59.5 | 108.7 | 89.8 |
| 96 | S1481 | Zosuquidar (LY335979) 3HCl | P-gp | 12.0 | 8.7 | 30.6 | 19.5 |
| 97 | S1091 | Linsitinib (OSI-906) | IGF-1R | 24.1 | 22.6 | 79.8 | 58.2 |
| 98 | S1501 | Mycophenolate Mofetil | Dehydrogenase | 21.7 | 16.9 | 107.4 | 73.9 |
| 99 | S1122 | Mocetinostat (MGCD0103) | HDAC | 23.4 | 16.9 | 113.5 | 81.2 |
| 100 | S1517 | Natamycin | Anti-infection | 87.7 | 95.6 | 105.8 | 79.2 |
| 101 | S1150 | Paclitaxel | Autophagy, Microtubule Associated | 31.7 | 21.4 | 92.3 | 71.5 |
| 102 | S1565 | VX-809 (Lumacaftor) | CFTR | 105.8 | 100.7 | 112.6 | 72.1 |
| 103 | S1178 | Regorafenib (BAY 73-4506) | c-RET, VEGFR | 27.1 | 19.8 | 91.4 | 67.0 |
| 104 | S1594 | Semagacestat (LY450139) | Gamma-secretase | 110.6 | 105.2 | 102.0 | 79.9 |
| 105 | S1196 | Exemestane | Aromatase | 109.9 | 75.6 | 98.8 | 95.6 |
| 106 | S1610 | Metolazone | Others | 94.3 | 108.1 | 102.6 | 103.5 |
| 107 | S1207 | Tivozanib (AV-951) | c-Kit,PDGFR,VEGFR | 36.0 | 58.1 | 76.1 | 70.9 |
| 108 | S1623 | Acetylcysteine | TNF-alpha,ROS | 102.5 | 108.6 | 107.4 | 75.3 |
| 109 | S1222 | Dexrazoxane HCl (ICRF-187, ADR-529) | Topoisomerase | 90.0 | 102.3 | 104.0 | 89.1 |
| 110 | S1633 | Zafirlukast | LTR | 90.7 | 96.4 | 106.6 | 76.9 |
| 111 | S1237 | Temozolomide | DNA/RNA Synthesis,Autophagy | 59.6 | 60.9 | 109.9 | 76.7 |
| 112 | S1644 | Nitrofural | Anti-infection | 82.3 | 80.2 | 96.4 | 86.6 |
| 113 | S1256 | Rufinamide | Sodium Channel | 87.0 | 74.4 | 107.4 | 87.7 |
| 114 | S1654 | Phenylbutazone | Immunology & Inflammation related | 33.4 | 25.6 | 110.3 | 85.3 |
| 115 | S1271 | Acarbose | Others | 93.5 | 105.2 | 99.6 | 82.5 |
| 116 | S1669 | Loteprednol etabonate | Glucocorticoid Receptor | 63.1 | 86.5 | 119.3 | 92.7 |
| 117 | S1286 | Budesonide | Glucocorticoid Receptor | 50.8 | 90.5 | 126.5 | 105.7 |
| 118 | S1685 | Sulfanilamide | Anti-infection | 60.5 | 71.9 | 103.0 | 88.4 |
| 119 | S1302 | Ifosfamide | DNA/RNA Synthesis | 26.0 | 19.9 | 114.8 | 82.1 |
| 120 | S1701 | Desonide | Glucocorticoid Receptor | 45.3 | 72.4 | 114.6 | 81.9 |
| 121 | S1329 | Etomidate | GABA Receptor | 15.6 | 12.8 | 102.9 | 79.3 |
| 122 | S1713 | Piroxicam | COX | 86.1 | 98.4 | 117.2 | 77.7 |
| 123 | S1342 | Genistein | EGFR,Topoisomerase | 39.1 | 42.4 | 93.5 | 78.0 |
| 124 | S1725 | Terbinafine | Anti-infection | 88.0 | 87.1 | 105.3 | 77.1 |
| 125 | S1362 | Rigosertib (ON-01910) | PLK | 22.7 | 16.7 | 87.2 | 70.5 |
| 126 | S1736 | Methocarbamol | Carbonic Anhydrase | 105.0 | 108.9 | 111.7 | 77.3 |
| 127 | S1377 | Drospirenone | Estrogen/progestogen Receptor | 75.9 | 87.1 | 96.8 | 74.6 |
| 128 | S1744 | Nicotinic Acid | Vitamin | 104.4 | 113.8 | 102.8 | 94.3 |
| 129 | S1389 | Omeprazole | Proton Pump,Autophagy | 111.7 | 108.4 | 93.7 | 69.8 |
| 130 | S1762 | Pyrazinamide | Anti-infection | 105.2 | 103.1 | 108.2 | 73.1 |
| 131 | S1401 | Tenofovir | Reverse Transcriptase | 111.4 | 113.6 | 102.4 | 73.5 |
| 132 | S1775 | Thiotepa | Others | 50.0 | 30.7 | 113.9 | 75.2 |
| 133 | S1006 | Saracatinib (AZD0530) | Src | 61.3 | 84.2 | 77.7 | 56.2 |
| 134 | S1430 | Rolipram | PDE | 101.8 | 102.3 | 99.3 | 78.9 |
| 135 | S1021 | Dasatinib | Bcr-Abl,c-Kit,Src | 32.4 | 16.9 | 85.5 | 58.5 |
| 136 | S1442 | Voriconazole | P450 (e.g. CYP17) | 55.6 | 62.1 | 99.8 | 74.9 |
| 137 | S1040 | Sorafenib Tosylate | PDGFR,Raf,VEGFR | 105.8 | 108.8 | 107.5 | 80.5 |
| 138 | S1467 | Doxercalciferol | Vitamin | 18.5 | 14.5 | 103.9 | 85.6 |
| 139 | S1064 | Masitinib (AB1010) | c-Kit,PDGFR | 30.8 | 29.5 | 65.2 | 49.9 |
| 140 | S1482 | Daclatasvir (BMS-790052) | HCV Protease | 17.5 | 13.3 | 35.5 | 20.5 |
| 141 | S1096 | Quisinostat (JNJ-26481585) 2HCl | HDAC | 23.0 | 16.5 | 95.7 | 63.3 |
| 142 | S1504 | Dyphylline | PDE | 64.3 | 86.0 | 109.3 | 84.1 |
| 143 | S1130 | YM155 (Sepantronium Bromide) | Survivin | 13.3 | 10.4 | 32.2 | 19.6 |
| 144 | S1523 | Voxtalisib (SAR245409, XL765) Analogue | mTOR, PI3K | 47.7 | 26.5 | 127.9 | 97.0 |
| 145 | S1153 | Roscovitine (Seliciclib, CYC202) | CDK | 23.8 | 14.4 | 95.5 | 72.9 |
| 146 | S1567 | Pomalidomide | TNF-alpha | 72.9 | 86.9 | 109.6 | 77.7 |
| 147 | S1185 | Ritonavir | HIV Protease, P450 (e.g. CYP17) | 29.7 | 19.4 | 69.2 | 68.8 |
| 148 | S1601 | Reserpine | Others | 88.7 | 71.4 | 104.8 | 66.0 |
| 149 | S1197 | Finasteride | 5-alpha Reductase | 99.9 | 102.2 | 100.6 | 78.4 |
| 150 | S1611 | Cefoperazone | Anti-infection | 121.5 | 118.2 | 108.9 | 86.0 |
| 151 | S1208 | Doxorubicin (Adriamycin) HCl | Topoisomerase | 14.4 | 10.9 | 52.3 | 35.0 |
| 152 | S1625 | Ethinyl Estradiol | Ethinyl Estradiol | 23.2 | 27.6 | 108.8 | 71.4 |
| 153 | S1223 | Epirubicin HCl | Topoisomerase | 15.0 | 11.1 | 51.3 | 36.4 |
| 154 | S1635 | Erythromycin | Anti-infection | 96.8 | 109.7 | 114.2 | 76.7 |
| 155 | S1238 | Tamoxifen | Estrogen/progestogen Receptor,Autophagy | 57.2 | 37.9 | 48.7 | 28.7 |
| 156 | S1645 | Ketoprofen | COX | 96.7 | 102.4 | 106.0 | 80.9 |
| 157 | S1257 | Posaconazole | P450 (e.g. CYP17) | 101.6 | 97.5 | 107.1 | 86.7 |
| 158 | S1655 | Ezetimibe | LDL | 80.8 | 95.8 | 106.8 | 89.0 |
| 159 | S1276 | Adapalene | Retinoid Receptor | 47.7 | 32.9 | 91.5 | 69.2 |
| 160 | S1672 | Aminoglutethimide | Aromatase | 112.0 | 110.3 | 108.8 | 81.5 |
| 161 | S1287 | Bumetanide | Others | 101.5 | 103.1 | 104.1 | 89.0 |
| 162 | S1688 | Betamethasone Dipropionate | Glucocorticoid Receptor | 48.5 | 73.4 | 115.6 | 93.5 |
| 163 | S1304 | Megestrol Acetate | Androgen Receptor,Estrogen/progestogen Receptor | 27.8 | 20.6 | 104.7 | 84.2 |
| 164 | S1702 | Didanosine | Reverse Transcriptase | 55.6 | 75.1 | 109.7 | 81.4 |
| 165 | S1330 | Felbamate | NMDAR | 15.9 | 11.8 | 107.4 | 82.8 |
| 166 | S1714 | Gemcitabine | Autophagy,DNA/RNA Synthesis | 13.1 | 9.1 | 84.6 | 64.0 |
| 167 | S1344 | Glimepiride | Potassium Channel | 74.7 | 78.6 | 90.7 | 57.3 |
| 168 | S1727 | Levonorgestrel | Estrogen/progestogen Receptor | 100.5 | 107.9 | 101.3 | 76.7 |
| 169 | S1364 | Patupilone (EPO906, Epothilone B) | Microtubule Associated | 31.2 | 20.7 | 85.0 | 62.1 |
| 170 | S1737 | Prednisolone | Immunology & Inflammation related,Glucocorticoid Receptor | 65.2 | 82.9 | 103.4 | 73.3 |
| 171 | S1379 | Isotretinoin | Hydroxylase | 77.2 | 86.7 | 103.0 | 75.0 |
| 172 | S1747 | Nimodipine | Autophagy,Calcium Channel | 89.3 | 102.7 | 92.0 | 76.3 |
| 173 | S1390 | Ondansetron HCl | 5-HT Receptor | 107.1 | 102.7 | 98.6 | 79.2 |
| 174 | S1763 | Quetiapine Fumarate | Dopamine Receptor | 59.0 | 77.0 | 90.3 | 62.0 |
| 175 | S1403 | Tigecycline | Anti-infection | 50.3 | 69.1 | 95.3 | 65.7 |
| 176 | S1776 | Toremifene Citrate | Estrogen/progestogen Receptor | 12.4 | 9.5 | 38.7 | 25.1 |
| 177 | S1007 | Roxadustat (FG-4592) | HIF | 33.9 | 21.0 | 99.6 | 71.4 |
| 178 | S1431 | Sildenafil Citrate | PDE | 92.3 | 98.9 | 98.3 | 75.8 |
| 179 | S1025 | Gefitinib (ZD1839) | EGFR | 87.9 | 52.2 | 83.5 | 57.4 |
| 180 | S1443 | Zileuton | Lipoxygenase | 87.4 | 84.8 | 99.8 | 83.7 |
| 181 | S1042 | Sunitinib Malate | c-Kit,PDGFR,VEGFR | 14.5 | 11.0 | 53.9 | 37.5 |
| 182 | S1468 | Alfacalcidol | Vitamin | 18.0 | 14.1 | 104.3 | 101.7 |
| 183 | S1065 | Pictilisib (GDC-0941) | PI3K | 41.7 | 50.7 | 99.3 | 86.5 |
| 184 | S1483 | Iloperidone | 5-HT Receptor | 35.2 | 59.2 | 86.1 | 72.4 |
| 185 | S1098 | Rucaparib (AG-014699, PF-01367338) phosphate | PARP | 22.4 | 20.2 | 105.3 | 75.6 |
| 186 | S1505 | Aztreonam | Anti-infection | 71.0 | 90.8 | 103.1 | 73.4 |
| 187 | S1133 | Alisertib (MLN8237) | Aurora Kinase | 37.1 | 20.3 | 100.5 | 76.6 |
| 188 | S1526 | Quizartinib (AC220) | FLT3 | 18.5 | 12.2 | 112.1 | 74.9 |
| 189 | S1156 | Capecitabine | DNA/RNA Synthesis | 95.8 | 105.6 | 103.5 | 74.8 |
| 190 | S1569 | Tazarotene | Retinoid Receptor | 64.8 | 81.5 | 87.9 | 80.3 |
| 191 | S1189 | Aprepitant | Substance P | 27.4 | 19.1 | 89.6 | 67.3 |
| 192 | S1603 | Furosemide | Sodium Channel | 111.3 | 108.8 | 99.9 | 79.7 |
| 193 | S1199 | Cladribine | DNA/RNA Synthesis | 27.2 | 20.3 | 68.6 | 53.7 |
| 194 | S1613 | Silodosin | Adrenergic Receptor | 96.4 | 114.7 | 104.9 | 75.1 |
| 195 | S1209 | Fluorouracil (5-Fluoracil, 5-FU) | DNA/RNA Synthesis | 54.5 | 36.7 | 79.0 | 62.7 |
| 196 | S1626 | Naproxen Sodium | COX | 113.5 | 108.5 | 103.6 | 72.9 |
| 197 | S1225 | Etoposide | Topoisomerase | 20.4 | 13.6 | 101.0 | 81.8 |
| 198 | S1636 | Amphotericin B | Anti-infection | 90.0 | 107.3 | 95.0 | 75.3 |
| 199 | S1241 | Vincristine sulfate | Autophagy,Microtubule Associated | 24.1 | 14.8 | 99.9 | 71.7 |
| 200 | S1646 | Ketorolac | COX | 96.1 | 92.4 | 116.4 | 74.1 |
| 201 | S1258 | Prasugrel | P2 Receptor | 108.6 | 91.8 | 109.3 | 79.7 |
| 202 | S1657 | Enalaprilat Dihydrate | RAAS | 95.3 | 112.7 | 100.1 | 96.4 |
| 203 | S1278 | Altretamine | DNA alkylator | 44.3 | 62.3 | 105.8 | 78.2 |
| 204 | S1676 | Amorolfine HCl | Anti-infection | 51.5 | 54.8 | 101.6 | 87.1 |
| 205 | S1289 | Carmofur | DNA/RNA Synthesis | 50.3 | 33.8 | 82.5 | 60.9 |
| 206 | S1689 | Meprednisone | Glucocorticoid Receptor | 39.6 | 48.3 | 96.7 | 83.6 |
| 207 | S1305 | Mercaptopurine (6-MP) | DNA/RNA Synthesis | 30.5 | 23.8 | 108.1 | 88.8 |
| 208 | S1703 | Divalproex Sodium | HDAC | 58.4 | 59.0 | 114.4 | 88.1 |
| 209 | S1331 | Fluconazole | P450 (e.g. CYP17) | 95.4 | 83.7 | 99.6 | 83.2 |
| 210 | S1715 | Glipizide | Others | 94.0 | 90.4 | 114.6 | 80.0 |
| 211 | S1351 | Ivermectin | Chloride Channel,Anti-infection | 11.8 | 8.7 | 29.5 | 18.9 |
| 212 | S1729 | Gemfibrozil | PPAR | 90.0 | 99.6 | 94.6 | 78.0 |
| 213 | S1367 | Amonafide | Topoisomerase | 15.7 | 14.7 | 73.8 | 57.5 |
| 214 | S1738 | Telmisartan | RAAS | 105.5 | 102.3 | 115.9 | 83.9 |
| 215 | S1380 | Lopinavir | HIV Protease | 83.7 | 78.8 | 96.6 | 80.0 |
| 216 | S1748 | Nisoldipine | Calcium Channel | 24.0 | 15.0 | 93.3 | 72.7 |
| 217 | S1391 | Oxcarbazepine | Sodium Channel | 109.0 | 93.7 | 104.7 | 83.2 |
| 218 | S1764 | Rifampin | DNA/RNA Synthesis | 111.7 | 116.6 | 124.1 | 90.0 |
| 219 | S1405 | Vecuronium Bromide | AChR | 101.9 | 109.2 | 99.0 | 73.3 |
| 220 | S1777 | Ethionamide | Anti-infection | 103.6 | 107.2 | 113.2 | 74.8 |
| 221 | S1008 | Selumetinib (AZD6244) | MEK | 35.9 | 23.0 | 101.0 | 84.4 |
| 222 | S1432 | Sumatriptan Succinate | 5-HT Receptor | 99.7 | 99.2 | 99.6 | 74.8 |
| 223 | S1026 | Imatinib Mesylate (STI571) | Bcr-Abl,c-Kit,PDGFR | 59.7 | 30.1 | 93.7 | 63.8 |
| 224 | S1444 | Ziprasidone HCl | 5-HT Receptor,Dopamine Receptor | 66.3 | 78.0 | 96.2 | 94.1 |
| 225 | S1044 | Temsirolimus  (CCI-779, NSC 683864) | mTOR | 33.6 | 48.0 | 58.8 | 35.4 |
| 226 | S1469 | Calcifediol | Vitamin | 24.4 | 17.5 | 102.8 | 79.2 |
| 227 | S1068 | Crizotinib (PF-02341066) | ALK,c-Met | 20.9 | 15.1 | 50.7 | 37.6 |
| 228 | S1488 | Naratriptan HCl | 5-HT Receptor | 74.4 | 96.0 | 101.5 | 75.8 |
| 229 | S1101 | Vatalanib (PTK787) 2HCl | VEGFR | 32.8 | 29.7 | 75.2 | 61.0 |
| 230 | S1508 | Alprostadil | Immunology & Inflammation related | 26.8 | 22.8 | 111.1 | 88.9 |
| 231 | S1137 | Malotilate | Others | 67.1 | 82.5 | 110.7 | 89.4 |
| 232 | S1538 | Telaprevir (VX-950) | HCV Protease | 35.6 | 34.2 | 99.7 | 102.1 |
| 233 | S1157 | Delanzomib (CEP-18770) | Proteasome | 11.6 | 9.1 | 76.7 | 50.0 |
| 234 | S1573 | Fasudil (HA-1077) HCl | Autophagy,ROCK | 80.1 | 73.5 | 107.0 | 92.5 |
| 235 | S1191 | Fulvestrant | Estrogen/progestogen Receptor | 81.4 | 89.6 | 93.8 | 77.6 |
| 236 | S1604 | Olmesartan Medoxomil | RAAS | 103.3 | 100.1 | 107.2 | 76.4 |
| 237 | S1200 | Decitabine | DNA Methyltransferase | 51.2 | 35.4 | 103.8 | 92.4 |
| 238 | S1614 | Riluzole | GluR,Sodium Channel | 43.6 | 43.7 | 100.5 | 75.7 |
| 239 | S1210 | Methotrexate | DHFR | 25.1 | 17.7 | 105.3 | 81.2 |
| 240 | S1627 | Nitazoxanide | Others | 77.6 | 92.7 | 134.2 | 122.0 |
| 241 | S1227 | Raloxifene HCl | Estrogen/progestogen Receptor | 37.4 | 73.8 | 85.8 | 80.1 |
| 242 | S1638 | Ibuprofen | COX | 103.9 | 111.8 | 106.4 | 80.8 |
| 243 | S1243 | Agomelatine | 5-HT Receptor | 90.6 | 99.7 | 101.6 | 76.9 |
| 244 | S1647 | Adenosine | Adenosine Receptor | 84.4 | 82.5 | 102.2 | 77.7 |
| 245 | S1259 | Ramelteon | MT Receptor | 97.5 | 97.1 | 99.5 | 75.5 |
| 246 | S1658 | Dofetilide | Potassium Channel | 77.6 | 94.3 | 110.2 | 151.8 |
| 247 | S1280 | Amisulpride | Dopamine Receptor | 92.7 | 100.7 | 101.7 | 76.3 |
| 248 | S1677 | Chloramphenicol | Anti-infection | 106.3 | 103.3 | 71.2 | 59.4 |
| 249 | S1291 | Cetirizine DiHCl | Histamine Receptor | 102.8 | 101.0 | 105.0 | 84.4 |
| 250 | S1690 | Betamethasone Valerate | Glucocorticoid Receptor | 29.6 | 65.2 | 111.9 | 79.7 |
| 251 | S1312 | Streptozotocin (STZ) | DNA alkylator | 91.9 | 98.1 | 110.8 | 82.7 |
| 252 | S1704 | Emtricitabine | Reverse Transcriptase | 52.5 | 53.6 | 117.6 | 81.8 |
| 253 | S1332 | Flumazenil | GABA Receptor | 52.3 | 42.7 | 105.6 | 84.9 |
| 254 | S1716 | Glyburide (Glibenclamide) | Potassium Channel | 92.0 | 103.2 | 107.4 | 91.7 |
| 255 | S1354 | Lansoprazole | Proton Pump | 69.8 | 86.5 | 89.9 | 66.6 |
| 256 | S1730 | Indapamide | Others | 96.3 | 93.4 | 104.8 | 81.8 |
| 257 | S1368 | Acitretin | Retinoid Receptor | 88.7 | 95.8 | 92.2 | 79.7 |
| 258 | S1739 | Thiabendazole | P450 (e.g. CYP17) | 97.7 | 98.0 | 111.0 | 79.9 |
| 259 | S1381 | Meropenem | Anti-infection | 112.2 | 104.7 | 104.2 | 87.1 |
| 260 | S1754 | Oxybutynin | AChR | 55.1 | 72.5 | 99.0 | 67.8 |
| 261 | S1394 | Pizotifen Malate | 5-HT Receptor | 45.7 | 61.3 | 80.6 | 65.0 |
| 262 | S1768 | Cefditoren Pivoxil | Anti-infection | 111.4 | 108.6 | 108.5 | 72.6 |
| 263 | S1407 | Bimatoprost | Immunology & Inflammation related | 99.2 | 102.2 | 107.6 | 84.5 |
| 264 | S1778 | Trifluridine | DNA/RNA Synthesis | 22.5 | 13.9 | 107.2 | 68.8 |
| 265 | S1010 | Nintedanib (BIBF 1120) | FGFR, PDGFR, VEGFR | 91.4 | 53.2 | 46.4 | 21.3 |
| 266 | S1436 | Tianeptine sodium | 5-HT Receptor | 98.5 | 95.9 | 95.2 | 68.4 |
| 267 | S1028 | Lapatinib (GW-572016) Ditosylate | EGFR, HER2 | 34.8 | 11.1 | 81.9 | 57.5 |
| 268 | S1445 | Zonisamide | Sodium Channel | 72.9 | 85.0 | 104.5 | 121.6 |
| 269 | S1047 | Vorinostat (SAHA, MK0683) | Autophagy, HDAC | 26.6 | 19.5 | 99.6 | 62.7 |
| 270 | S1470 | Orantinib (TSU-68, SU6668) | PDGFR | 99.5 | 103.8 | 90.1 | 64.6 |
| 271 | S1082 | Vismodegib (GDC-0449) | Hedgehog/Smoothened | 100.4 | 94.5 | 100.7 | 109.1 |
| 272 | S1490 | Ponatinib (AP24534) | Bcr-Abl,FGFR,PDGFR,VEGFR | 20.3 | 15.2 | 44.5 | 37.6 |
| 273 | S1111 | Foretinib (GSK1363089) | c-Met,VEGFR | 23.7 | 23.5 | 33.9 | 18.8 |
| 274 | S1511 | Lactulose | Others | 48.9 | 57.4 | 104.5 | 75.2 |
| 275 | S1141 | Tanespimycin (17-AAG) | HSP (e.g. HSP90) | 23.0 | 18.7 | 117.6 | 99.7 |
| 276 | S1541 | Selisistat (EX 527) | Sirtuin | 54.0 | 68.6 | 112.4 | 75.5 |
| 277 | S1159 | Ganetespib (STA-9090) | HSP (e.g. HSP90) | 20.9 | 17.2 | 99.9 | 84.7 |
| 278 | S1574 | Doramapimod (BIRB 796) | p38 MAPK | 69.4 | 78.3 | 93.2 | 90.2 |
| 279 | S1192 | Raltitrexed | DNA/RNA Synthesis | 24.1 | 19.0 | 100.7 | 72.0 |
| 280 | S1605 | Cefdinir | Anti-infection | 105.6 | 96.3 | 109.4 | 89.0 |
| 281 | S1201 | Dimesna | Others | 106.5 | 102.4 | 97.6 | 103.3 |
| 282 | S1618 | Sulfameter | DHFR | 102.3 | 111.5 | 103.4 | 76.4 |
| 283 | S1212 | Bendamustine HCl | DNA/RNA Synthesis | 112.0 | 105.5 | 101.0 | 81.9 |
| 284 | S1628 | Triamcinolone Acetonide | Glucocorticoid Receptor | 58.6 | 91.0 | 115.3 | 84.1 |
| 285 | S1228 | Idarubicin HCl | Topoisomerase | 12.4 | 8.8 | 43.7 | 24.5 |
| 286 | S1639 | Amprenavir | HIV Protease | 60.9 | 68.1 | 107.1 | 71.0 |
| 287 | S1244 | Amuvatinib (MP-470) | c-Kit, FLT3, PDGFR | 77.7 | 93.3 | 108.8 | 78.7 |
| 288 | S1649 | Zolmitriptan | 5-HT Receptor | 78.3 | 94.3 | 116.0 | 70.8 |
| 289 | S1260 | Cinacalcet HCl | CaSR | 15.5 | 9.4 | 66.6 | 23.9 |
| 290 | S1662 | Isradipine | Calcium Channel | 61.5 | 67.0 | 101.2 | 155.5 |
| 291 | S1281 | Aniracetam | AMPA Receptor-kainate Receptor-NMDA Receptor | 100.6 | 107.2 | 105.6 | 79.8 |
| 292 | S1679 | Flurbiprofen | Immunology & Inflammation related | 93.9 | 95.5 | 107.0 | 74.4 |
| 293 | S1293 | Cilnidipine | Calcium Channel | 14.5 | 22.5 | 101.9 | 82.7 |
| 294 | S1691 | Praziquantel | Anti-infection | 55.7 | 86.2 | 103.8 | 86.2 |
| 295 | S1322 | Dexamethasone (DHAP) | Autophagy,IL Receptor | 53.7 | 90.8 | 113.4 | 83.0 |
| 296 | S1705 | Progesterone | Estrogen/progestogen Receptor | 34.1 | 61.7 | 105.0 | 81.6 |
| 297 | S1333 | Fluoxetine HCl | 5-HT Receptor | 21.6 | 24.4 | 72.9 | 71.5 |
| 298 | S1718 | Adefovir Dipivoxil | Reverse Transcriptase | 22.6 | 17.7 | 108.7 | 80.8 |
| 299 | S1356 | Levetiracetam | Calcium Channel | 65.2 | 75.7 | 100.2 | 81.1 |
| 300 | S1732 | Mitotane | Others | 92.6 | 78.4 | 105.1 | 78.7 |
| 301 | S1369 | Bafetinib (INNO-406) | Bcr-Abl | 28.6 | 21.1 | 86.7 | 68.3 |
| 302 | S1740 | Guaifenesin | Others | 101.3 | 93.1 | 106.3 | 85.6 |
| 303 | S1382 | Mianserin HCl | Histamine Receptor | 56.3 | 60.1 | 82.4 | 76.7 |
| 304 | S1756 | Enoxacin | Topoisomerase | 103.6 | 96.3 | 104.3 | 74.6 |
| 305 | S1396 | Resveratrol | Autophagy | 60.2 | 41.5 | 86.8 | 73.2 |
| 306 | S1770 | Sulfadiazine | Anti-infection | 91.1 | 100.4 | 109.6 | 80.7 |
| 307 | S1408 | Linezolid | Anti-infection | 58.3 | 91.9 | 60.1 | 43.2 |
| 308 | S1782 | Azacitidine | DNA Methyltransferase | 20.0 | 12.0 | 99.8 | 58.2 |
| 309 | S1011 | Afatinib (BIBW2992) | EGFR,HER2 | 19.1 | 13.3 | 56.9 | 44.0 |
| 310 | S1437 | Tizanidine HCl | Adrenergic Receptor | 99.0 | 96.1 | 116.1 | 77.1 |
| 311 | S1029 | Lenalidomide (CC-5013) | TNF-alpha | 89.1 | 95.3 | 110.6 | 79.0 |
| 312 | S1452 | Ispinesib (SB-715992) | Kinesin | 11.9 | 8.8 | 33.2 | 20.5 |
| 313 | S1048 | Tozasertib (VX-680, MK-0457) | Aurora Kinase | 21.6 | 16.5 | 81.3 | 77.3 |
| 314 | S1472 | Safinamide Mesylate | MAO | 90.9 | 102.2 | 111.9 | 82.3 |
| 315 | S1085 | Belinostat (PXD101) | HDAC | 24.1 | 19.9 | 97.0 | 83.5 |
| 316 | S1491 | Fludarabine | DNA/RNA Synthesis,STAT | 12.3 | 10.9 | 35.1 | 22.0 |
| 317 | S1117 | Triciribine | Akt | 33.0 | 37.4 | 105.9 | 77.1 |
| 318 | S1512 | Tadalafil | PDE | 47.8 | 68.6 | 101.8 | 85.4 |
| 319 | S1144 | Ivacaftor (VX-770) | CFTR | 103.8 | 100.2 | 94.0 | 71.7 |
| 320 | S1548 | Dapagliflozin | CFTR | 55.7 | 57.7 | 103.2 | 79.0 |
| 321 | S1163 | Onalespib (AT13387) | SGLT | 22.0 | 17.0 | 91.4 | 95.9 |
| 322 | S1576 | Sulfasalazine | Immunology & Inflammation related | 96.6 | 103.3 | 101.4 | 90.7 |
| 323 | S1193 | Thalidomide | E3 Ligase, TNF-alpha | 106.8 | 109.0 | 63.6 | 82.6 |
| 324 | S1606 | Clotrimazole | Anti-infection | 72.9 | 56.4 | 112.4 | 63.2 |
| 325 | S1202 | Dutasteride | 5-alpha Reductase | 102.2 | 95.3 | 89.9 | 97.8 |
| 326 | S1619 | Prilocaine | Sodium Channel | 107.7 | 103.3 | 104.6 | 84.3 |
| 327 | S1213 | Nelarabine | DNA/RNA Synthesis | 94.6 | 105.4 | 100.2 | 83.7 |
| 328 | S1629 | Orlistat | Lipase,Fatty Acid Synthase | 20.7 | 40.7 | 115.7 | 79.5 |
| 329 | S1229 | Fludarabine Phosphate | DNA/RNA Synthesis | 17.2 | 12.9 | 36.9 | 27.4 |
| 330 | S1640 | Albendazole | Microtubule Associated | 18.5 | 12.8 | 102.6 | 67.0 |
| 331 | S1247 | Leflunomide | Dehydrogenase | 25.6 | 20.1 | 139.5 | 94.5 |
| 332 | S1651 | Telbivudine | Reverse Transcriptase | 102.1 | 94.0 | 121.6 | 80.7 |
| 333 | S1261 | Celecoxib | COX | 114.2 | 87.7 | 97.0 | 58.1 |
| 334 | S1665 | Estrone | Estrogen/progestogen Receptor | 57.6 | 37.2 | 113.8 | 121.1 |
| 335 | S1282 | Artemisinin | Anti-infection | 31.7 | 22.0 | 111.0 | 99.5 |
| 336 | S1680 | Disulfiram | Dehydrogenase | 67.1 | 60.2 | 55.1 | 48.6 |
| 337 | S1294 | Cilostazol | PDE | 88.0 | 109.4 | 127.5 | 95.1 |
| 338 | S1692 | Busulfan | DNA alkylator | 43.9 | 78.1 | 97.2 | 82.9 |
| 339 | S1324 | Doxazosin Mesylate | Adrenergic Receptor | 43.6 | 53.8 | 107.4 | 77.1 |
| 340 | S1706 | Lamivudine | Reverse Transcriptase | 84.2 | 92.4 | 116.1 | 83.7 |
| 341 | S1334 | Flupirtine maleate | DNA/RNA Synthesis | 82.4 | 79.4 | 111.6 | 79.9 |
| 342 | S1719 | Zalcitabine | Reverse Transcriptase | 105.2 | 82.8 | 119.4 | 93.3 |
| 343 | S1357 | Lidocaine | Histamine Receptor | 73.3 | 77.6 | 103.6 | 90.6 |
| 344 | S1733 | Methylprednisolone | Glucocorticoid Receptor,Immunology & Inflammation related | 51.5 | 79.9 | 109.9 | 99.2 |
| 345 | S1373 | Daptomycin | Anti-infection,DNA/RNA Synthesis | 91.4 | 98.7 | 44.7 | 38.7 |
| 346 | S1741 | Rifabutin | Anti-infection | 107.3 | 108.8 | 127.4 | 76.6 |
| 347 | S1385 | Mosapride Citrate | 5-HT Receptor | 108.4 | 106.8 | 96.6 | 100.4 |
| 348 | S1759 | Pitavastatin Calcium | HMG-CoA Reductase | 32.4 | 25.6 | 107.7 | 111.7 |
| 349 | S1397 | Rocuronium Bromide | AChR | 113.9 | 116.4 | 106.9 | 98.5 |
| 350 | S1771 | Chlorprothixene | Dopamine Receptor | 57.1 | 106.3 | 83.8 | 78.0 |
| 351 | S1409 | Alfuzosin HCl | Adrenergic Receptor | 111.0 | 106.5 | 104.1 | 97.7 |
| 352 | S1784 | Vidarabine | DNA/RNA Synthesis | 70.8 | 69.5 | 88.6 | 95.3 |
| 353 | S1786 | Verteporfin | VDA,Hippo pathway | 18.4 | 13.2 | 60.4 | 39.9 |
| 354 | S2126 | Naftopidil | Adrenergic Receptor | 87.5 | 82.6 | 103.1 | 82.9 |
| 355 | S1801 | Ranitidine Hydrochloride | Histamine Receptor | 99.2 | 93.3 | 93.7 | 84.5 |
| 356 | S2167 | Bazedoxifene Acetate | Estrogen/progestogen Receptor | 14.0 | 48.2 | 53.5 | 35.4 |
| 357 | S1823 | Fenoprofen Calcium | Immunology & Inflammation related | 80.0 | 84.6 | 101.6 | 93.8 |
| 358 | S2216 | Mubritinib (TAK 165) | HER2 | 71.9 | 82.2 | 90.9 | 77.1 |
| 359 | S1833 | Butoconazole nitrate | Anti-infection | 12.5 | 9.1 | 79.0 | 85.1 |
| 360 | S2248 | Silmitasertib (CX-4945) | Casein Kinase | 48.2 | 39.7 | 79.9 | 67.8 |
| 361 | S1848 | Curcumin | NF-κB,HDAC,Histone Acetyltransferase,Nrf2 | 90.2 | 48.0 | 87.2 | 89.0 |
| 362 | S2328 | Nalidixic acid | Topoisomerase | 88.9 | 96.7 | 94.5 | 90.6 |
| 363 | S1876 | Valaciclovir HCl | Anti-infection | 104.8 | 97.3 | 92.1 | 84.7 |
| 364 | S2376 | Ammonium Glycyrrhizinate | Dehydrogenase | 101.8 | 100.9 | 95.8 | 88.6 |
| 365 | S1890 | Nizatidine | Histamine Receptor | 106.7 | 101.3 | 98.5 | 92.1 |
| 366 | S2451 | Amantadine HCl | Dopamine Receptor | 106.7 | 97.5 | 87.9 | 80.7 |
| 367 | S1902 | Vitamin B12 | Vitamin | 95.7 | 100.2 | 89.7 | 92.2 |
| 368 | S2459 | Clozapine | 5-HT Receptor | 82.1 | 93.7 | 83.9 | 76.9 |
| 369 | S1913 | Tropicamide | AChR | 87.1 | 109.9 | 91.4 | 98.4 |
| 370 | S2475 | Imatinib (STI571) | PDGFR | 31.4 | 60.0 | 77.6 | 71.2 |
| 371 | S1933 | Triamcinolone | Glucocorticoid Receptor | 63.0 | 93.5 | 104.2 | 102.4 |
| 372 | S2489 | Nateglinide | Potassium Channel | 67.8 | 97.5 | 88.3 | 93.1 |
| 373 | S1956 | Miconazole Nitrate | Anti-infection | 61.4 | 92.3 | 62.2 | 68.8 |
| 374 | S2500 | Propafenone HCl | Sodium Channel | 21.2 | 14.5 | 85.5 | 78.5 |
| 375 | S1969 | Nefiracetam | GABA Receptor | 89.7 | 88.3 | 90.7 | 85.1 |
| 376 | S2509 | Sotalol HCl | Adrenergic Receptor | 101.3 | 101.7 | 85.7 | 85.9 |
| 377 | S1987 | Mometasone furoate | Glucocorticoid Receptor | 57.5 | 89.0 | 83.4 | 70.7 |
| 378 | S2521 | Epinephrine bitartrate | Adrenergic Receptor | 63.0 | 48.3 | 89.4 | 82.2 |
| 379 | S2006 | Pyrimethamine | DHFR | 50.7 | 45.4 | 90.0 | 87.1 |
| 380 | S2535 | Econazole nitrate | Anti-infection,Calcium Channel | 33.0 | 48.2 | 61.9 | 46.9 |
| 381 | S2025 | Urapidil HCl | 5-HT Receptor | 72.5 | 97.0 | 102.5 | 87.1 |
| 382 | S2550 | Tolterodine tartrate | AChR | 54.6 | 69.8 | 82.8 | 81.7 |
| 383 | S2040 | Nimesulide | COX | 83.6 | 91.5 | 97.4 | 88.5 |
| 384 | S2561 | Clomifene citrate | Estrogen/progestogen Receptor | 11.8 | 8.7 | 62.6 | 41.4 |
| 385 | S2052 | Oxytetracycline Dihydrate | Anti-infection | 73.9 | 95.7 | 75.3 | 54.9 |
| 386 | S2574 | Tetracycline HCl | Anti-infection | 51.5 | 74.4 | 76.2 | 76.0 |
| 387 | S2062 | Tiopronin | ROS | 108.4 | 105.3 | 93.6 | 86.2 |
| 388 | S2589 | Miglitol | Others | 114.0 | 99.2 | 86.4 | 87.8 |
| 389 | S2077 | Atorvastatin Calcium | HMG-CoA Reductase | 43.7 | 55.3 | 87.2 | 85.6 |
| 390 | S2605 | Idebenone | ROS | 86.7 | 80.0 | 127.0 | 114.6 |
| 391 | S2087 | Rivastigmine Tartrate | AChR | 83.7 | 81.8 | 103.6 | 88.6 |
| 392 | S2625 | Fostamatinib (R788) | Syk | 24.1 | 20.8 | 76.0 | 81.8 |
| 393 | S2101 | Gabexate Mesylate | Serine Protease | 94.6 | 97.2 | 65.6 | 71.0 |
| 394 | S2727 | Dacomitinib (PF299804, PF299) | EGFR | 14.5 | 10.8 | 33.4 | 28.1 |
| 395 | S2113 | Cisatracurium Besylate | Adrenergic Receptor | 21.0 | 13.7 | 89.8 | 74.6 |
| 396 | S2768 | Dinaciclib (SCH727965) | CDK | 21.7 | 15.0 | 91.5 | 82.8 |
| 397 | S1787 | Teniposide | Topoisomerase | 13.4 | 9.1 | 94.0 | 97.9 |
| 398 | S2127 | S- (+)-Rolipram | PDE | 100.2 | 91.0 | 92.9 | 79.1 |
| 399 | S1802 | AICAR (Acadesine) | AMPK | 99.9 | 100.5 | 65.8 | 86.6 |
| 400 | S2169 | Rosuvastatin Calcium | HMG-CoA Reductase | 98.9 | 94.6 | 92.1 | 88.7 |
| 401 | S1825 | Erdosteine | Others | 96.1 | 90.1 | 90.1 | 84.4 |
| 402 | S2217 | Irinotecan HCl Trihydrate | Topoisomerase | 29.3 | 16.4 | 75.4 | 64.1 |
| 403 | S1835 | Azithromycin | Anti-infection,Autophagy | 67.0 | 86.4 | 82.7 | 77.8 |
| 404 | S2264 | Artemether | Anti-infection | 42.2 | 43.6 | 86.2 | 83.0 |
| 405 | S1854 | Bifonazole | Anti-infection | 58.4 | 59.9 | 85.0 | 73.2 |
| 406 | S2336 | Orotic acid (6-Carboxyuracil) | Others | 86.1 | 101.4 | 90.5 | 87.5 |
| 407 | S1878 | Ganciclovir | Anti-infection | 107.7 | 96.4 | 91.7 | 91.6 |
| 408 | S2378 | Butylscopolamine Bromide | Others | 86.8 | 86.1 | 85.7 | 86.0 |
| 409 | S1891 | Carbidopa | Decarboxylase | 25.9 | 58.1 | 109.8 | 92.7 |
| 410 | S2452 | Amfebutamone (Bupropion) HCl | AChR,Dopamine Receptor | 112.9 | 98.8 | 83.9 | 83.9 |
| 411 | S1903 | Diclofenac Sodium | COX | 108.3 | 99.6 | 92.7 | 84.6 |
| 412 | S2460 | Pramipexole | Dopamine Receptor | 112.9 | 103.2 | 86.9 | 81.8 |
| 413 | S1914 | Pregnenolone | Estrogen/progestogen Receptor | 97.8 | 97.8 | 85.8 | 90.5 |
| 414 | S2479 | Lincomycin HCl | Anti-infection | 59.7 | 70.7 | 88.0 | 88.5 |
| 415 | S1934 | Nystatin (Fungicidin) | Anti-infection | 88.9 | 96.7 | 80.2 | 71.8 |
| 416 | S2491 | Nitrendipine | Calcium Channel,Autophagy | 89.9 | 97.8 | 87.8 | 79.7 |
| 417 | S1957 | Sulfamethizole | Anti-infection | 24.3 | 16.6 | 86.2 | 87.5 |
| 418 | S2501 | Pyrantel Pamoate | Anti-infection | 22.3 | 15.5 | 79.5 | 80.2 |
| 419 | S1971 | Nicorandil | Potassium Channel | 75.8 | 81.3 | 88.3 | 92.0 |
| 420 | S2510 | Spectinomycin 2HCl | Anti-infection | 100.7 | 92.8 | 46.4 | 42.2 |
| 421 | S1988 | Propylthiouracil | Others | 89.0 | 91.7 | 103.4 | 85.6 |
| 422 | S2522 | L-Adrenaline | Adrenergic Receptor | 24.2 | 58.4 | 87.6 | 84.6 |
| 423 | S2007 | Sulindac | COX | 96.6 | 88.8 | 87.1 | 83.9 |
| 424 | S2536 | Miconazole | Anti-infection | 74.8 | 75.8 | 60.1 | 66.8 |
| 425 | S2029 | Uridine | DNA/RNA Synthesis | 70.4 | 87.4 | 94.7 | 87.9 |
| 426 | S2551 | Sulbactam sodium | Anti-infection | 72.2 | 80.5 | 92.4 | 84.1 |
| 427 | S2041 | Dyclonine HCl | Sodium Channel | 14.7 | 10.3 | 77.8 | 85.5 |
| 428 | S2564 | Cloxacillin Sodium | Anti-infection | 88.2 | 100.3 | 90.6 | 82.7 |
| 429 | S2054 | Orphenadrine Citrate | AChR | 95.6 | 99.3 | 84.0 | 79.9 |
| 430 | S2576 | Xylometazoline HCl | Adrenergic Receptor | 76.3 | 82.8 | 82.4 | 83.3 |
| 431 | S2064 | Balofloxacin | Topoisomerase | 89.4 | 98.6 | 65.0 | 54.1 |
| 432 | S2593 | Tolvaptan | Vasopressin Receptor | 114.1 | 101.8 | 90.8 | 82.0 |
| 433 | S2078 | Famotidine | Histamine Receptor | 85.5 | 81.6 | 90.0 | 91.4 |
| 434 | S2606 | Mifepristone | Estrogen/progestogen Receptor | 103.7 | 67.0 | 71.6 | 74.4 |
| 435 | S2090 | Dexmedetomidine HCl | Adrenergic Receptor | 45.3 | 35.8 | 100.3 | 73.0 |
| 436 | S2658 | Omipalisib (GSK2126458, GSK458) | mTOR, PI3K | 19.0 | 16.0 | 81.0 | 77.7 |
| 437 | S2102 | Rasagiline Mesylate | MAO | 88.7 | 99.4 | 98.6 | 80.4 |
| 438 | S2730 | Crenolanib (CP-868596) | PDGFR | 16.3 | 11.9 | 54.7 | 63.7 |
| 439 | S2114 | Dronedarone HCl | Potassium Channel,Sodium Channel,Calcium Channel | 11.8 | 9.1 | 26.5 | 18.8 |
| 440 | S2787 | Laquinimod | Immunology & Inflammation related | 96.3 | 81.0 | 92.4 | 87.3 |
| 441 | S1789 | Tetrabenazine (Xenazine) | Dopamine Receptor | 101.3 | 89.9 | 93.3 | 82.0 |
| 442 | S2128 | Bazedoxifene HCl | Estrogen/progestogen Receptor | 104.5 | 89.7 | 28.9 | 18.8 |
| 443 | S1806 | Acipimox | Others | 100.4 | 100.9 | 97.0 | 85.0 |
| 444 | S2173 | Telotristat Etiprate (LX 1606 Hippurate) | Hydroxylase | 39.1 | 45.0 | 54.8 | 76.7 |
| 445 | S1827 | Betaxolol HCl | Adrenergic Receptor | 82.1 | 80.1 | 90.2 | 83.9 |
| 446 | S2226 | Idelalisib (CAL-101, GS-1101) | PI3K | 71.2 | 68.7 | 85.9 | 77.3 |
| 447 | S1836 | Albendazole Oxide | Microtubule Associated | 33.6 | 20.2 | 91.4 | 84.8 |
| 448 | S2265 | Artesunate | STAT | 30.4 | 18.3 | 83.6 | 79.3 |
| 449 | S1855 | Pefloxacin Mesylate | Anti-infection | 13.0 | 9.0 | 83.2 | 77.6 |
| 450 | S2344 | Piperine | P450 (e.g. CYP17) | 31.2 | 22.3 | 83.4 | 71.7 |
| 451 | S1880 | Roxatidine Acetate HCl | Histamine Receptor | 109.3 | 105.6 | 85.5 | 86.1 |
| 452 | S2381 | D-Mannitol | Others | 87.8 | 94.8 | 81.4 | 79.7 |
| 453 | S1894 | Valsartan | RAAS | 114.9 | 107.3 | 94.0 | 80.1 |
| 454 | S2453 | Benserazide HCl | Decarboxylase | 37.7 | 47.3 | 96.4 | 87.3 |
| 455 | S1904 | Avobenzone | Others | 65.8 | 68.9 | 90.3 | 83.6 |
| 456 | S2461 | Domperidone | Dopamine Receptor | 94.6 | 66.7 | 70.8 | 68.5 |
| 457 | S1915 | Sulfamethoxazole | Anti-infection | 42.3 | 34.2 | 89.4 | 76.0 |
| 458 | S2480 | Loperamide HCl | Opioid Receptor,Autophagy | 16.4 | 17.5 | 70.6 | 68.1 |
| 459 | S1937 | Isoniazid | Fatty Acid Synthase | 72.9 | 68.1 | 86.2 | 82.3 |
| 460 | S2492 | Novobiocin Sodium | Topoisomerase | 77.0 | 93.6 | 56.9 | 44.0 |
| 461 | S1958 | Sulbactam | Anti-infection | 109.9 | 112.0 | 98.8 | 85.1 |
| 462 | S2502 | Quinine HCl Dihydrate | Potassium Channel | 70.9 | 94.8 | 79.4 | 80.6 |
| 463 | S1972 | Tamoxifen Citrate | Estrogen/progestogen Receptor,Autophagy | 79.4 | 76.4 | 34.2 | 24.6 |
| 464 | S2511 | Sulfadoxine | Anti-infection | 102.6 | 99.5 | 89.0 | 87.2 |
| 465 | S1990 | Capsaicin(Vanilloid) | Others | 71.7 | 91.2 | 85.8 | 82.5 |
| 466 | S2524 | Phenytoin Sodium | Sodium Channel | 80.0 | 86.3 | 86.2 | 85.4 |
| 467 | S2011 | Pramipexole 2HCl Monohydrate | Dopamine Receptor | 91.6 | 84.1 | 88.9 | 83.4 |
| 468 | S2537 | Secnidazole | Anti-infection | 112.3 | 94.9 | 91.4 | 80.2 |
| 469 | S2030 | Flunarizine 2HCl | Calcium Channel | 17.3 | 12.9 | 97.2 | 81.7 |
| 470 | S2552 | Azelastine HCl | Histamine Receptor | 20.3 | 16.0 | 66.5 | 69.3 |
| 471 | S2042 | Cyproterone Acetate | Androgen Receptor | 24.4 | 16.8 | 93.2 | 80.6 |
| 472 | S2565 | Amoxicillin Sodium | Anti-infection | 99.1 | 109.9 | 89.5 | 89.1 |
| 473 | S2055 | Gimeracil | Dehydrogenase | 110.7 | 91.5 | 95.5 | 83.8 |
| 474 | S2577 | Phenacetin | COX | 110.3 | 100.5 | 89.8 | 83.1 |
| 475 | S2065 | Lafutidine | Histamine Receptor | 103.7 | 112.8 | 97.7 | 80.1 |
| 476 | S2594 | Pramiracetam | Others | 115.0 | 90.3 | 89.4 | 78.7 |
| 477 | S2079 | Moexipril HCl | RAAS | 98.6 | 88.6 | 94.2 | 75.9 |
| 478 | S2607 | Buflomedil HCl | Adrenergic Receptor | 64.0 | 69.2 | 88.6 | 75.7 |
| 479 | S2091 | Betaxolol | Adrenergic Receptor | 75.7 | 70.2 | 86.0 | 72.6 |
| 480 | S2664 | Clinofibrate | HMG-CoA Reductase | 104.6 | 112.9 | 90.2 | 80.3 |
| 481 | S2103 | Naltrexone HCl | Opioid Receptor | 84.6 | 91.9 | 87.8 | 77.0 |
| 482 | S2736 | Fedratinib (SAR302503, TG101348) | JAK | 11.4 | 8.0 | 44.3 | 37.2 |
| 483 | S2116 | Conivaptan HCl | Vasopressin Receptor | 105.7 | 113.5 | 84.2 | 75.0 |
| 484 | S2790 | Istradefylline | Adenosine Receptor | 109.2 | 103.5 | 78.2 | 65.0 |
| 485 | S1790 | Rifaximin | DNA/RNA Synthesis | 101.3 | 87.2 | 86.2 | 88.9 |
| 486 | S2130 | Atropine sulfate monohydrate | AChR | 106.0 | 91.5 | 91.1 | 82.3 |
| 487 | S1807 | Aciclovir | Anti-infection | 80.4 | 87.2 | 86.9 | 83.2 |
| 488 | S2179 | Gandotinib (LY2784544) | JAK | 39.0 | 60.0 | 86.5 | 76.2 |
| 489 | S1828 | Proparacaine HCl | Sodium Channel | 99.5 | 93.3 | 88.6 | 87.9 |
| 490 | S2229 | Eltrombopag Olamine | Thrombin | 37.7 | 31.4 | 83.7 | 96.6 |
| 491 | S1839 | Chloroxine | Anti-infection | 61.7 | 97.2 | 50.2 | 77.6 |
| 492 | S2284 | Colchicine | Microtubule Associated | 22.7 | 15.5 | 80.3 | 80.5 |
| 493 | S1856 | Metoprolol Tartrate | Adrenergic Receptor | 99.1 | 96.0 | 87.8 | 84.1 |
| 494 | S2350 | Rutin | Immunology & Inflammation related | 103.1 | 95.0 | 92.7 | 82.7 |
| 495 | S1881 | Protionamide | Anti-infection | 105.9 | 93.7 | 93.1 | 85.9 |
| 496 | S2388 | L-carnitine | Others | 114.9 | 113.8 | 87.9 | 94.1 |
| 497 | S1895 | Dipyridamole | PDE | 69.5 | 103.0 | 69.5 | 60.9 |
| 498 | S2454 | Bupivacaine HCl | Sodium Channel | 102.4 | 90.0 | 89.4 | 80.7 |
| 499 | S1905 | Amlodipine | Calcium Channel | 30.8 | 45.2 | 57.6 | 68.6 |
| 500 | S2466 | Estriol | Estrogen/progestogen Receptor | 92.2 | 78.2 | 91.9 | 76.5 |
| 501 | S1916 | Sulfisoxazole | Anti-infection | 77.6 | 70.8 | 95.5 | 82.7 |
| 502 | S2481 | Manidipine | Calcium Channel | 66.0 | 109.9 | 64.2 | 60.9 |
| 503 | S1940 | Levofloxacin | Topoisomerase | 106.9 | 103.8 | 54.6 | 48.1 |
| 504 | S2493 | Olanzapine | 5-HT Receptor,Dopamine Receptor | 94.3 | 84.5 | 90.5 | 77.3 |
| 505 | S1959 | Tolfenamic Acid | COX | 100.2 | 105.9 | 86.2 | 70.4 |
| 506 | S2503 | Racecadotril | Opioid Receptor | 112.0 | 112.6 | 83.4 | 78.0 |
| 507 | S1974 | Meglumine | Others | 104.8 | 84.2 | 95.9 | 84.2 |
| 508 | S2512 | Tenoxicam | Immunology & Inflammation related | 99.4 | 83.5 | 85.2 | 84.1 |
| 509 | S1992 | Fluticasone propionate | Glucocorticoid Receptor | 46.1 | 50.5 | 80.1 | 70.4 |
| 510 | S2525 | Phenytoin | Sodium Channel | 94.2 | 72.1 | 93.1 | 84.2 |
| 511 | S2016 | Mirtazapine | 5-HT Receptor | 59.7 | 62.6 | 89.8 | 87.6 |
| 512 | S2541 | Clomipramine HCl | 5-HT Receptor | 56.1 | 68.1 | 54.0 | 64.0 |
| 513 | S2031 | Fenticonazole Nitrate | Anti-infection | 79.5 | 103.7 | 33.1 | 24.5 |
| 514 | S2553 | 5-Aminolevulinic acid HCl | Others | 47.8 | 59.5 | 89.9 | 81.3 |
| 515 | S2043 | Memantine HCl | P450 (e.g. CYP17),AMPA Receptor-kainate Receptor-NMDA Receptor | 101.1 | 87.3 | 84.6 | 81.3 |
| 516 | S2566 | Isoprenaline HCl | Adrenergic Receptor | 61.8 | 49.6 | 113.3 | 95.3 |
| 517 | S2057 | Cyclophosphamide Monohydrate | DNA alkylator | 111.9 | 95.7 | 97.5 | 82.2 |
| 518 | S2579 | Zidovudine | Reverse Transcriptase | 79.3 | 43.5 | 79.0 | 72.5 |
| 519 | S2066 | Moxonidine | Others | 108.6 | 106.3 | 92.5 | 85.6 |
| 520 | S2596 | Clindamycin palmitate HCl | Others | 113.3 | 96.0 | 78.2 | 76.1 |
| 521 | S2080 | Clevidipine Butyrate | Calcium Channel | 90.0 | 71.2 | 87.4 | 84.1 |
| 522 | S2608 | Fluocinonide | Glucocorticoid Receptor | 72.1 | 87.7 | 76.2 | 66.4 |
| 523 | S2092 | Detomidine HCl | Adrenergic Receptor | 103.4 | 101.1 | 90.3 | 74.3 |
| 524 | S2665 | Ciprofibrate | PPAR | 85.7 | 102.8 | 91.5 | 83.6 |
| 525 | S2104 | Levosulpiride | Dopamine Receptor | 104.2 | 108.5 | 94.1 | 81.4 |
| 526 | S2741 | Niraparib (MK-4827) | PARP | 29.3 | 21.4 | 75.4 | 69.0 |
| 527 | S2118 | Ibutilide Fumarate | Sodium Channel | 86.1 | 101.5 | 81.5 | 75.2 |
| 528 | S2791 | Sotrastaurin | PKC | 96.3 | 94.3 | 80.4 | 89.6 |
| 529 | S1792 | Simvastatin | HMG-CoA Reductase | 111.2 | 79.1 | 53.6 | 58.3 |
| 530 | S2131 | Roflumilast | PDE | 104.1 | 83.1 | 86.8 | 75.3 |
| 531 | S1808 | Nifedipine | Calcium Channel | 47.9 | 61.2 | 85.2 | 84.5 |
| 532 | S2180 | Ixazomib (MLN2238) | Proteasome | 11.7 | 10.3 | 79.0 | 75.4 |
| 533 | S1829 | Pranlukast | Immunology & Inflammation related | 59.8 | 79.9 | 94.8 | 87.0 |
| 534 | S2230 | Galunisertib (LY2157299) | TGF-beta/Smad | 89.7 | 71.9 | 88.5 | 80.9 |
| 535 | S1840 | Lomustine | DNA/RNA Synthesis | 97.2 | 98.8 | 90.9 | 84.8 |
| 536 | S2286 | Cyclosporin A | Immunology & Inflammation related | 15.9 | 10.6 | 38.8 | 35.0 |
| 537 | S1859 | Diethylstilbestrol | Estrogen/progestogen Receptor | 74.0 | 69.5 | 88.8 | 79.5 |
| 538 | S2357 | Silibinin | Others | 109.1 | 104.5 | 83.8 | 73.1 |
| 539 | S1883 | Idoxuridine | Anti-infection | 33.8 | 21.4 | 87.3 | 89.6 |
| 540 | S2393 | Sorbitol | Others | 117.4 | 88.7 | 90.9 | 79.6 |
| 541 | S1896 | Hydroxyurea | DNA/RNA Synthesis | 104.2 | 81.5 | 97.1 | 77.9 |
| 542 | S2455 | Bethanechol chloride | AChR | 119.3 | 88.1 | 90.6 | 82.5 |
| 543 | S1907 | Metronidazole | DNA/RNA Synthesis | 71.4 | 69.4 | 86.6 | 74.4 |
| 544 | S2467 | Famciclovir | Anti-infection | 104.0 | 87.6 | 82.2 | 75.2 |
| 545 | S1917 | Crystal Violet | Others | 47.1 | 33.4 | 189.1 | 131.0 |
| 546 | S2482 | Manidipine 2HCl | Calcium Channel | 14.4 | 10.1 | 43.7 | 44.0 |
| 547 | S1941 | Enalapril Maleate | RAAS | 112.5 | 100.7 | 88.7 | 86.5 |
| 548 | S2494 | Olopatadine HCl | Histamine Receptor | 112.0 | 98.1 | 90.0 | 82.9 |
| 549 | S1960 | Pranoprofen | COX | 104.4 | 107.2 | 92.6 | 76.5 |
| 550 | S2504 | Ribavirin | Anti-infection | 76.5 | 66.7 | 57.3 | 69.9 |
| 551 | S1975 | Aripiprazole | 5-HT Receptor | 116.1 | 91.5 | 93.5 | 90.9 |
| 552 | S2515 | Vardenafil HCl Trihydrate | PDE | 100.1 | 85.8 | 77.5 | 77.8 |
| 553 | S1994 | Lacidipine | Calcium Channel | 67.8 | 63.7 | 81.9 | 76.3 |
| 554 | S2528 | Ciclopirox | ATPase,Anti-infection | 22.1 | 10.0 | 72.1 | 88.0 |
| 555 | S2017 | Benidipine HCl | Calcium Channel | 12.5 | 10.1 | 81.7 | 88.1 |
| 556 | S2542 | Phenformin HCl | AMPK | 114.9 | 96.2 | 88.5 | 76.9 |
| 557 | S2032 | Rebamipide | Others | 101.8 | 102.2 | 84.3 | 84.1 |
| 558 | S2555 | Clarithromycin | P450 (e.g. CYP17) | 107.0 | 100.0 | 82.6 | 81.3 |
| 559 | S2044 | Cyproheptadine HCl | Histamine Receptor | 35.4 | 24.6 | 76.1 | 71.8 |
| 560 | S2567 | Medroxyprogesterone acetate | Estrogen/progestogen Receptor | 86.9 | 102.6 | 110.2 | 84.0 |
| 561 | S2058 | Tolnaftate | Anti-infection | 66.1 | 53.1 | 91.3 | 80.5 |
| 562 | S2581 | Quinapril HCl | RAAS | 104.2 | 105.9 | 89.5 | 80.2 |
| 563 | S2067 | Ozagrel HCl | P450 (e.g. CYP17) | 116.0 | 103.5 | 92.2 | 81.1 |
| 564 | S2599 | L-Thyroxine | Others | 97.1 | 84.7 | 86.9 | 74.0 |
| 565 | S2082 | Adiphenine HCl | AChR | 70.5 | 70.5 | 93.2 | 71.7 |
| 566 | S2610 | Lonidamine | Others | 71.4 | 97.4 | 78.7 | 75.0 |
| 567 | S2096 | Almotriptan Malate | 5-HT Receptor | 104.0 | 101.7 | 96.9 | 83.8 |
| 568 | S2667 | Dolutegravir (GSK1349572) | Integrase | 72.3 | 111.7 | 82.4 | 74.8 |
| 569 | S2105 | Pantoprazole | Proton Pump | 78.0 | 69.2 | 85.5 | 79.9 |
| 570 | S2753 | Tivantinib (ARQ 197) | c-Met | 23.1 | 15.2 | 75.4 | 77.7 |
| 571 | S2119 | Probucol | LDL | 98.7 | 102.1 | 92.2 | 79.8 |
| 572 | S2792 | Torcetrapib | CETP | 54.7 | 61.2 | 90.5 | 77.4 |
| 573 | S1793 | Ramipril | RAAS | 96.2 | 86.6 | 94.2 | 86.9 |
| 574 | S2151 | Sonidegib (Erismodegib, NVP-LDE225) | Hedgehog/Smoothened | 104.4 | 95.3 | 93.5 | 80.4 |
| 575 | S1811 | Amiloride HCl | Sodium Channel,Calcium Channel | 101.2 | 91.7 | 74.8 | 82.5 |
| 576 | S2181 | Ixazomib Citrate (MLN9708) | Proteasome | 12.0 | 10.7 | 76.5 | 82.2 |
| 577 | S1830 | Oxfendazole | Anti-infection | 29.8 | 67.6 | 88.8 | 78.0 |
| 578 | S2233 | Esomeprazole sodium | ATPase | 112.9 | 96.7 | 84.3 | 83.2 |
| 579 | S1843 | Chenodeoxycholic Acid | FXR | 99.7 | 96.2 | 89.7 | 81.9 |
| 580 | S2290 | Dihydroartemisinin (DHA) | Others | 30.6 | 29.6 | 88.4 | 93.7 |
| 581 | S1865 | Diltiazem HCl | Calcium Channel | 90.7 | 86.2 | 87.6 | 82.2 |
| 582 | S2369 | Troxerutin | Others | 99.9 | 98.6 | 97.8 | 83.8 |
| 583 | S1884 | Sparfloxacin | Anti-infection | 104.6 | 99.1 | 48.8 | 48.8 |
| 584 | S2422 | Ipriflavone (Osteofix) | Others | 83.1 | 87.2 | 84.8 | 81.2 |
| 585 | S1897 | Potassium Iodide | Others | 112.5 | 107.3 | 93.7 | 98.3 |
| 586 | S2456 | Chlorpromazine HCl | Potassium Channel,Dopamine Receptor | 75.8 | 64.4 | 61.5 | 59.7 |
| 587 | S1908 | Flutamide | Androgen Receptor | 58.6 | 73.8 | 78.9 | 78.9 |
| 588 | S2470 | Fluocinolone Acetonide | Glucocorticoid Receptor | 66.7 | 88.4 | 101.8 | 80.4 |
| 589 | S1920 | Haloperidol | Dopamine Receptor | 95.4 | 95.3 | 65.3 | 68.7 |
| 590 | S2485 | Mitoxantrone 2HCl | Topoisomerase | 40.9 | 27.0 | 56.4 | 40.9 |
| 591 | S1949 | Menadione | DNA/RNA Synthesis,phosphatase | 13.7 | 9.0 | 95.0 | 86.7 |
| 592 | S2496 | Ozagrel | P450 (e.g. CYP17) | 100.8 | 92.3 | 90.0 | 80.4 |
| 593 | S1962 | Sulphadimethoxine | Anti-infection | 115.1 | 113.9 | 86.3 | 80.5 |
| 594 | S2505 | Rosiglitazone maleate | PPAR | 99.4 | 109.2 | 89.9 | 84.9 |
| 595 | S1978 | Methscopolamine | AChR | 101.3 | 81.8 | 94.4 | 90.7 |
| 596 | S2516 | Xylazine HCl | Adrenergic Receptor | 98.6 | 85.2 | 80.8 | 75.2 |
| 597 | S2001 | Elvitegravir (GS-9137, JTK-303) | Integrase | 20.0 | 15.0 | 73.1 | 66.5 |
| 598 | S2529 | Dopamine HCl | Dopamine Receptor | 50.1 | 66.6 | 102.8 | 103.9 |
| 599 | S2020 | Formoterol Hemifumarate | Adrenergic Receptor | 79.9 | 69.2 | 94.1 | 82.3 |
| 600 | S2543 | Ceftiofur HCl | Anti-infection | 106.8 | 88.7 | 84.4 | 73.5 |
| 601 | S2036 | Aspartame | Others | 108.9 | 97.3 | 94.1 | 86.1 |
| 602 | S2556 | Rosiglitazone | PPAR | 103.2 | 93.0 | 83.4 | 81.0 |
| 603 | S2045 | Doxifluridine | Phosphorylase | 107.7 | 92.4 | 79.5 | 81.2 |
| 604 | S2569 | Phenylephrine HCl | Adrenergic Receptor | 100.7 | 95.2 | 88.5 | 82.4 |
| 605 | S2059 | Terazosin HCl Dihydrate | Adrenergic Receptor | 90.4 | 95.9 | 85.1 | 82.9 |
| 606 | S2583 | Thiamphenicol | Anti-infection | 97.6 | 92.8 | 58.4 | 61.5 |
| 607 | S2069 | Argatroban | Thrombin | 110.0 | 104.6 | 92.7 | 78.9 |
| 608 | S2601 | Gliclazide | Potassium Channel | 108.6 | 80.7 | 93.3 | 77.6 |
| 609 | S2084 | Duloxetine HCl | 5-HT Receptor | 54.4 | 65.9 | 45.7 | 47.4 |
| 610 | S2613 | Clorsulon | Anti-infection | 69.6 | 82.2 | 88.6 | 76.5 |
| 611 | S2097 | Ambrisentan | Endothelin Receptor | 99.1 | 89.3 | 86.7 | 79.1 |
| 612 | S2673 | Trametinib (GSK1120212) | MEK | 88.7 | 92.0 | 92.5 | 97.4 |
| 613 | S2108 | Flunixin Meglumin | COX | 36.7 | 27.8 | 91.0 | 84.2 |
| 614 | S2755 | Varlitinib | EGFR | 98.5 | 96.4 | 77.7 | 76.2 |
| 615 | S2123 | Dextrose | Others | 119.9 | 107.3 | 87.5 | 83.7 |
| 616 | S2794 | Sofosbuvir (PSI-7977, GS-7977) | DNA/RNA Synthesis | 92.8 | 96.0 | 92.1 | 85.1 |
| 617 | S1794 | Fenofibrate | PPAR | 97.7 | 85.8 | 91.7 | 98.8 |
| 618 | S2154 | Dabigatran Etexilate | Thrombin | 100.3 | 88.7 | 92.1 | 78.9 |
| 619 | S1813 | Amlodipine Besylate | Calcium Channel | 24.6 | 19.4 | 62.4 | 76.8 |
| 620 | S2199 | Aliskiren Hemifumarate | RAAS | 103.7 | 69.2 | 94.2 | 70.3 |
| 621 | S1831 | Carvedilol | Adrenergic Receptor | 26.9 | 30.1 | 69.1 | 64.4 |
| 622 | S2235 | Volasertib (BI 6727) | PLK | 20.7 | 15.3 | 59.4 | 59.1 |
| 623 | S1845 | Cimetidine | Histamine Receptor | 111.5 | 95.4 | 89.8 | 86.3 |
| 624 | S2293 | DL-Carnitine HCl | Others | 112.1 | 87.5 | 86.1 | 83.6 |
| 625 | S1866 | Diphenhydramine HCl | Histamine Receptor | 98.4 | 92.0 | 79.6 | 82.8 |
| 626 | S2373 | Yohimbine HCl | Adrenergic Receptor | 81.4 | 94.8 | 83.1 | 75.6 |
| 627 | S1885 | Felodipine | Calcium Channel | 66.5 | 58.9 | 86.2 | 77.4 |
| 628 | S2442 | Inosine | Others | 86.3 | 69.0 | 93.4 | 86.4 |
| 629 | S1898 | Tropisetron HCl | 5-HT Receptor | 81.8 | 99.6 | 89.2 | 78.7 |
| 630 | S2457 | Clindamycin HCl | Anti-infection | 85.0 | 82.3 | 90.1 | 83.0 |
| 631 | S1909 | Fluvastatin Sodium | HMG-CoA Reductase | 62.0 | 62.1 | 87.5 | 88.3 |
| 632 | S2471 | Gallamine Triethiodide | AChR | 69.6 | 80.3 | 87.5 | 86.6 |
| 633 | S1921 | Phenindione | Vitamin | 75.1 | 82.5 | 98.8 | 90.6 |
| 634 | S2486 | Moroxydine HCl | Anti-infection | 98.4 | 92.8 | 84.0 | 82.9 |
| 635 | S1950 | Metformin HCl | Autophagy | 101.3 | 103.4 | 92.2 | 80.5 |
| 636 | S2497 | Pancuronium dibromide | AChR | 106.1 | 105.7 | 87.6 | 82.7 |
| 637 | S1964 | Rimantadine | Anti-infection | 90.3 | 101.9 | 81.8 | 79.5 |
| 638 | S2506 | Roxithromycin | Anti-infection | 101.2 | 101.0 | 96.6 | 83.1 |
| 639 | S1979 | Amiodarone HCl | Autophagy,Potassium Channel | 89.8 | 88.2 | 77.6 | 102.2 |
| 640 | S2517 | Maprotiline HCl | Adrenergic Receptor | 87.0 | 79.9 | 74.4 | 77.0 |
| 641 | S2003 | Maraviroc | CCR | 93.4 | 96.0 | 88.4 | 80.7 |
| 642 | S2533 | Ritodrine HCl | Adrenergic Receptor | 101.8 | 92.7 | 92.7 | 91.4 |
| 643 | S2021 | Chlormezanone | Others | 94.2 | 83.0 | 89.0 | 87.4 |
| 644 | S2547 | Tiotropium Bromide hydrate | AChR | 77.0 | 48.8 | 87.7 | 86.2 |
| 645 | S2037 | Candesartan Cilexetil | RAAS | 93.3 | 97.3 | 55.1 | 53.0 |
| 646 | S2557 | Terbinafine HCl | Anti-infection | 76.3 | 78.3 | 90.8 | 82.8 |
| 647 | S2046 | Pioglitazone HCl | P450 (e.g. CYP17) | 102.2 | 87.3 | 89.4 | 86.8 |
| 648 | S2570 | Prednisolone Acetate | Glucocorticoid Receptor | 68.5 | 96.2 | 104.2 | 85.5 |
| 649 | S2060 | Bromhexine HCl | Others | 84.8 | 75.5 | 91.0 | 83.2 |
| 650 | S2584 | Clobetasol propionate | Glucocorticoid Receptor | 49.2 | 71.2 | 100.9 | 91.2 |
| 651 | S2074 | Mecarbinate | Others | 57.2 | 82.1 | 76.2 | 69.5 |
| 652 | S2602 | Acemetacin | COX | 61.0 | 73.1 | 92.9 | 79.4 |
| 653 | S2085 | Trimebutine | Opioid Receptor | 53.3 | 77.6 | 88.1 | 83.5 |
| 654 | S2614 | Arecoline HBr | AChR | 50.1 | 70.4 | 87.0 | 82.0 |
| 655 | S2098 | Bexarotene | Retinoid Receptor | 58.3 | 81.5 | 85.4 | 80.3 |
| 656 | S2680 | Ibrutinib (PCI-32765) | BTK | 79.6 | 93.0 | 82.4 | 64.0 |
| 657 | S2109 | Imidapril HCl | RAAS | 102.3 | 99.3 | 93.0 | 81.7 |
| 658 | S2757 | Evofosfamide (TH-302) | Others | 29.3 | 10.7 | 75.7 | 81.6 |
| 659 | S2124 | Xylose | Others | 71.0 | 88.3 | 89.3 | 83.4 |
| 660 | S2797 | Lonafarnib | Transferase | 32.7 | 21.7 | 79.2 | 57.2 |
| 661 | S1799 | Ranolazine | Calcium Channel | 98.7 | 90.4 | 88.9 | 103.9 |
| 662 | S2159 | Tebipenem Pivoxil | Anti-infection | 106.8 | 92.8 | 107.0 | 95.4 |
| 663 | S1816 | Chlorpheniramine Maleate | Histamine Receptor | 102.2 | 92.8 | 86.8 | 87.1 |
| 664 | S2208 | Formestane | Aromatase | 107.2 | 55.0 | 89.7 | 90.2 |
| 665 | S1832 | Atracurium Besylate | AChR | 29.8 | 27.7 | 83.8 | 85.5 |
| 666 | S2240 | Fesoterodine Fumarate | AChR | 102.9 | 84.7 | 88.2 | 83.7 |
| 667 | S1847 | Clemastine Fumarate | Histamine Receptor | 43.2 | 74.7 | 61.7 | 63.5 |
| 668 | S2296 | Enoxolone | Dehydrogenase | 103.7 | 92.7 | 92.5 | 84.2 |
| 669 | S1869 | Dapoxetine HCl | 5-HT Receptor | 47.0 | 48.4 | 70.2 | 78.1 |
| 670 | S2374 | 5-hydroxytryptophan (5-HTP) | Others | 89.5 | 94.2 | 88.9 | 84.7 |
| 671 | S1888 | Deflazacort | Glucocorticoid Receptor | 75.5 | 97.3 | 105.6 | 96.8 |
| 672 | S2443 | Tolbutamide | Potassium Channel | 77.6 | 83.7 | 94.1 | 90.2 |
| 673 | S1899 | Nicotinamide (Vitamin B3) | Sirtuin | 111.2 | 103.6 | 90.2 | 86.9 |
| 674 | S2458 | Clonidine HCl | Adrenergic Receptor,Autophagy | 78.1 | 78.1 | 93.0 | 94.9 |
| 675 | S1910 | Tioconazole | Anti-infection | 60.0 | 77.6 | 50.9 | 33.7 |
| 676 | S2473 | Hexestrol | Estrogen/progestogen Receptor | 78.6 | 100.7 | 83.4 | 84.4 |
| 677 | S1928 | Alibendol | Others | 68.6 | 82.3 | 87.8 | 84.8 |
| 678 | S2487 | Mycophenolic acid | Dehydrogenase | 24.8 | 17.1 | 86.3 | 79.1 |
| 679 | S1952 | Methoxsalen | P450 (e.g. CYP17) | 94.2 | 92.5 | 90.0 | 84.5 |
| 680 | S2499 | Phenoxybenzamine HCl | Adrenergic Receptor | 102.9 | 98.4 | 87.9 | 82.5 |
| 681 | S1965 | Primidone | Sodium Channel | 101.9 | 99.4 | 90.1 | 85.8 |
| 682 | S2508 | Scopolamine HBr | AChR | 104.0 | 108.4 | 98.7 | 87.3 |
| 683 | S1983 | Adenine HCl | DNA/RNA Synthesis | 106.9 | 90.3 | 93.0 | 107.1 |
| 684 | S2519 | Naphazoline HCl | Adrenergic Receptor | 106.3 | 92.1 | 96.3 | 104.6 |
| 685 | S2005 | Raltegravir (MK-0518) | Integrase | 111.7 | 101.0 | 96.4 | 96.4 |
| 686 | S2534 | Isoconazole nitrate | Anti-infection | 71.7 | 74.6 | 80.2 | 87.4 |
| 687 | S2024 | Ketotifen Fumarate | Histamine Receptor | 92.7 | 91.2 | 96.8 | 90.4 |
| 688 | S2549 | Trospium chloride | AChR | 114.2 | 93.3 | 91.2 | 90.3 |
| 689 | S2038 | Phentolamine Mesylate | Adrenergic Receptor | 98.2 | 94.3 | 96.7 | 94.1 |
| 690 | S2559 | Cortisone acetate | Glucocorticoid Receptor | 107.4 | 89.9 | 98.0 | 97.7 |
| 691 | S2051 | Captopril | RAAS | 109.6 | 91.0 | 99.0 | 97.0 |
| 692 | S2573 | Tetracaine HCl | Calcium Channel | 111.4 | 102.7 | 102.7 | 90.2 |
| 693 | S2061 | Lovastatin | HMG-CoA Reductase | 93.7 | 50.4 | 95.3 | 88.2 |
| 694 | S2585 | Brompheniramine hydrogen maleate | HMG-CoA Reductase | 96.0 | 98.4 | 91.5 | 86.5 |
| 695 | S2075 | Rosiglitazone HCl | PPAR | 86.5 | 94.8 | 96.0 | 90.6 |
| 696 | S2603 | Tioxolone | Carbonic Anhydrase | 113.8 | 88.6 | 105.9 | 92.0 |
| 697 | S2086 | Ivabradine HCl | Adrenergic Receptor | 76.7 | 89.3 | 101.0 | 97.4 |
| 698 | S2615 | Noradrenaline bitartrate monohydrate | Adrenergic Receptor | 104.2 | 86.6 | 131.5 | 136.3 |
| 699 | S2099 | Temocapril HCl | RAAS | 127.8 | 94.0 | 95.1 | 99.3 |
| 700 | S2693 | Resminostat | HDAC | 28.6 | 23.1 | 94.5 | 72.8 |
| 701 | S2111 | Lapatinib | EGFR, HER2 | 82.5 | 90.3 | 52.1 | 42.5 |
| 702 | S2760 | Canagliflozin | SGLT | 49.6 | 47.1 | 98.4 | 72.1 |
| 703 | S2125 | Mestranol | Estrogen/progestogen Receptor | 95.6 | 100.3 | 91.5 | 86.4 |
| 704 | S2803 | Galeterone | Androgen Receptor, P450 (e.g. CYP17) | 79.9 | 76.2 | 105.6 | 93.8 |
| 705 | S2807 | Dabrafenib (GSK2118436) | Raf | 62.7 | 61.5 | 110.9 | 90.5 |
| 706 | S4025 | Homatropine Bromide | AChR | 105.2 | 97.0 | 110.4 | 105.6 |
| 707 | S2907 | Pirfenidone | TGF-beta/Smad | 97.0 | 90.6 | 107.5 | 99.4 |
| 708 | S4040 | Norethindrone | Others | 91.2 | 98.4 | 107.1 | 103.4 |
| 709 | S3012 | Pazopanib | c-Kit,PDGFR,VEGFR | 107.2 | 104.3 | 87.3 | 95.2 |
| 710 | S4048 | Carbimazole | Others | 110.9 | 105.8 | 112.5 | 100.6 |
| 711 | S3027 | Fenoprofen calcium hydrate | Immunology & Inflammation related | 110.5 | 108.6 | 111.3 | 109.5 |
| 712 | S4058 | Ropivacaine HCl | Sodium Channel | 104.5 | 108.7 | 113.3 | 105.6 |
| 713 | S3045 | Cinepazide maleate | Calcium Channel | 94.4 | 106.1 | 99.9 | 101.3 |
| 714 | S4072 | Decamethonium Bromide | AChR | 99.0 | 114.0 | 105.0 | 116.8 |
| 715 | S3060 | Medetomidine HCl | Adrenergic Receptor | 104.2 | 101.1 | 108.1 | 121.6 |
| 716 | S4082 | Spiramycin | Anti-infection | 90.5 | 118.3 | 80.3 | 85.4 |
| 717 | S3075 | Dexmedetomidine | Adrenergic Receptor | 88.2 | 100.6 | 106.9 | 100.1 |
| 718 | S4091 | Ifenprodil Tartrate | NMDAR | 52.8 | 91.4 | 146.0 | 95.8 |
| 719 | S3105 | Nadifloxacin | Anti-infection | 79.8 | 108.9 | 203.9 | 43.9 |
| 720 | S4102 | Eprosartan Mesylate | RAAS | 79.2 | 99.3 | 105.3 | 105.0 |
| 721 | S3124 | Dexamethasone Acetate | Autophagy,IL Receptor | 66.7 | 107.3 | 141.8 | 106.0 |
| 722 | S4119 | Pefloxacin Mesylate Dihydrate | Topoisomerase | 95.7 | 116.2 | 98.4 | 90.3 |
| 723 | S3144 | Darifenacin HBr | AChR | 78.1 | 92.9 | 95.5 | 101.9 |
| 724 | S4135 | Clorprenaline HCl | Adrenergic Receptor | 107.8 | 111.0 | 110.2 | 104.3 |
| 725 | S3162 | Tylosin tartrate | Anti-infection | 103.4 | 113.3 | 118.2 | 113.5 |
| 726 | S4151 | Penfluridol | Dopamine Receptor | 18.2 | 13.0 | 36.1 | 22.7 |
| 727 | S3178 | Brinzolamide | Carbonic Anhydrase | 93.8 | 95.2 | 99.7 | 97.9 |
| 728 | S4166 | Chlorpropamide | Others | 80.7 | 81.5 | 103.9 | 96.1 |
| 729 | S3189 | Ropinirole HCl | Dopamine Receptor | 96.6 | 88.6 | 102.7 | 102.6 |
| 730 | S4179 | Mezlocillin Sodium | Anti-infection | 64.9 | 60.0 | 102.0 | 101.2 |
| 731 | S3207 | Iopromide | Others | 109.5 | 105.6 | 105.6 | 97.4 |
| 732 | S4191 | Betamipron | Anti-infection | 108.5 | 107.1 | 110.1 | 91.1 |
| 733 | S3639 | Tacrine hydrochloride hydrate | AChR | 107.8 | 110.8 | 98.3 | 94.4 |
| 734 | S4203 | Furaltadone HCl | Anti-infection | 99.8 | 107.8 | 63.5 | 66.1 |
| 735 | S3671 | Quinestrol | Estrogen/progestogen Receptor | 50.7 | 110.9 | 101.6 | 107.0 |
| 736 | S4216 | Valnemulin HCl | Anti-infection | 40.6 | 59.0 | 62.4 | 54.6 |
| 737 | S3701 | Benactyzine hydrochloride | AChR | 113.6 | 113.4 | 102.1 | 111.8 |
| 738 | S4228 | Fluorometholone Acetate | Glucocorticoid Receptor | 63.2 | 104.3 | 110.4 | 104.6 |
| 739 | S3724 | Velpatasvir | HCV Protease | 53.7 | 88.3 | 71.7 | 75.6 |
| 740 | S4242 | Cetrimonium Bromide (CTAB) | Anti-infection | 11.0 | 9.2 | 28.2 | 19.0 |
| 741 | S3733 | Boceprevir | HCV Protease | 94.0 | 111.0 | 91.8 | 78.3 |
| 742 | S4252 | Mechlorethamine HCl | DNA/RNA Synthesis | 17.5 | 11.8 | 106.2 | 100.1 |
| 743 | S3747 | Levothyroxine sodium | Others | 110.7 | 122.9 | 99.4 | 93.8 |
| 744 | S4267 | Diacerein | IL Receptor | 85.7 | 97.2 | 92.0 | 81.7 |
| 745 | S4002 | Sitagliptin phosphate monohydrate | DPP-4 | 74.4 | 92.5 | 102.2 | 103.7 |
| 746 | S4282 | Nelfinavir Mesylate | HIV Protease | 74.8 | 83.1 | 42.9 | 38.7 |
| 747 | S4014 | Hyoscyamine | AChR | 104.6 | 121.2 | 94.5 | 113.1 |
| 748 | S4291 | Labetalol HCl | Adrenergic Receptor | 88.3 | 114.3 | 102.0 | 102.0 |
| 749 | S2814 | Alpelisib (BYL719) | PI3K | 34.5 | 26.4 | 90.3 | 90.8 |
| 750 | S4026 | Hydroxyzine 2HCl | Histamine Receptor | 67.8 | 85.4 | 88.6 | 86.6 |
| 751 | S2922 | Icotinib | EGFR | 85.8 | 76.7 | 94.0 | 87.6 |
| 752 | S4041 | Olsalazine Sodium | Anti-infection | 67.6 | 65.9 | 104.6 | 89.1 |
| 753 | S3015 | Amoxicillin | Anti-infection | 98.7 | 109.3 | 98.3 | 100.3 |
| 754 | S4049 | Valdecoxib | COX | 52.1 | 106.5 | 97.1 | 90.8 |
| 755 | S3031 | Linagliptin | DPP-4 | 102.0 | 103.8 | 92.1 | 88.0 |
| 756 | S4060 | Erythromycin Ethylsuccinate | Anti-infection | 106.2 | 111.0 | 96.6 | 91.4 |
| 757 | S3046 | Azilsartan | RAAS | 104.9 | 111.8 | 103.0 | 88.6 |
| 758 | S4073 | Sodium 4-Aminosalicylate | NF-κB | 112.2 | 121.9 | 98.4 | 92.6 |
| 759 | S3061 | Epinephrine HCl | Adrenergic Receptor | 60.1 | 57.4 | 101.8 | 140.6 |
| 760 | S4083 | Vitamin A Acetate | Vitamin | 64.9 | 91.0 | 98.0 | 96.5 |
| 761 | S3076 | Foscarnet Sodium | Reverse Transcriptase | 78.6 | 101.7 | 100.1 | 95.6 |
| 762 | S4092 | Pramoxine HCl | Others | 94.3 | 109.6 | 103.5 | 94.8 |
| 763 | S3106 | Pidotimod | Immunology & Inflammation related | 104.9 | 112.0 | 94.7 | 89.6 |
| 764 | S4107 | Clofazimine | Phospholipase (e.g. PLA) | 13.4 | 11.0 | 35.7 | 42.2 |
| 765 | S3129 | Trimethoprim | Anti-infection | 103.8 | 108.2 | 103.4 | 92.9 |
| 766 | S4120 | Sulconazole Nitrate | Anti-infection | 34.3 | 87.6 | 48.3 | 52.5 |
| 767 | S3149 | Estradiol valerate | Estrogen/progestogen Receptor | 72.1 | 48.1 | 99.7 | 88.0 |
| 768 | S4136 | Carprofen | COX | 100.4 | 112.3 | 111.3 | 92.7 |
| 769 | S3163 | Benztropine mesylate | Dopamine Receptor | 80.7 | 113.3 | 96.4 | 87.1 |
| 770 | S4152 | Ethamsylate | Immunology & Inflammation related | 136.6 | 135.0 | 122.2 | 107.7 |
| 771 | S3179 | Carbenicillin disodium | Anti-infection | 84.3 | 87.1 | 100.6 | 106.7 |
| 772 | S4167 | Cyromazine | Anti-infection | 102.7 | 105.9 | 103.9 | 96.6 |
| 773 | S3193 | Ticarcillin sodium | Anti-infection | 94.0 | 87.5 | 106.8 | 95.4 |
| 774 | S4181 | Nicardipine HCl | Calcium Channel | 15.7 | 18.4 | 104.3 | 88.1 |
| 775 | S3208 | Fexofenadine HCl | Histamine Receptor | 96.6 | 107.7 | 106.2 | 92.2 |
| 776 | S4192 | Chlorquinaldol | Anti-infection | 20.3 | 17.3 | 44.4 | 58.3 |
| 777 | S3640 | Methoxyphenamine Hydrochloride | Adrenergic Receptor | 101.2 | 115.5 | 101.4 | 94.7 |
| 778 | S4204 | Isosorbide | Others | 97.6 | 97.5 | 102.2 | 88.3 |
| 779 | S3672 | Cefonicid sodium | Anti-infection | 116.6 | 116.2 | 100.0 | 94.0 |
| 780 | S4217 | Liothyronine Sodium | Others | 82.6 | 108.3 | 64.6 | 73.1 |
| 781 | S3706 | Sarpogrelate hydrochloride | 5-HT Receptor | 80.6 | 96.9 | 89.8 | 110.1 |
| 782 | S4229 | Oxybuprocaine HCl | Sodium Channel | 75.9 | 102.3 | 109.1 | 84.1 |
| 783 | S3726 | Selexipag | Immunology & Inflammation related | 75.3 | 100.0 | 97.3 | 94.5 |
| 784 | S4243 | Deoxycorticosterone acetate | Adrenergic Receptor | 85.1 | 105.1 | 94.6 | 91.0 |
| 785 | S3735 | Umeclidinium bromide | AChR | 82.3 | 101.9 | 75.8 | 77.2 |
| 786 | S4253 | Epinastine HCl | Histamine Receptor | 90.5 | 105.1 | 86.1 | 86.8 |
| 787 | S3751 | Quinidine sulfate | Sodium Channel | 51.1 | 83.0 | 86.9 | 77.7 |
| 788 | S4268 | Flufenamic acid | Immunology & Inflammation related | 21.5 | 37.3 | 96.9 | 93.7 |
| 789 | S4003 | Lithocholic acid | FXR | 84.6 | 103.5 | 102.4 | 88.9 |
| 790 | S4283 | Cyclobenzaprine HCl | 5-HT Receptor | 14.5 | 11.1 | 93.5 | 88.8 |
| 791 | S4016 | Ouabain | Sodium Channel | 15.5 | 13.2 | 102.6 | 70.8 |
| 792 | S4292 | Diphenidol HCl | AChR | 101.0 | 118.5 | 101.0 | 85.5 |
| 793 | S2823 | Tideglusib | GSK-3 | 102.4 | 96.1 | 102.4 | 90.2 |
| 794 | S4031 | Aclidinium Bromide | AChR | 97.3 | 98.4 | 89.4 | 91.4 |
| 795 | S2925 | Evacetrapib (LY2484595) | CETP | 81.8 | 33.9 | 99.4 | 91.5 |
| 796 | S4042 | Nafcillin Sodium | Anti-infection | 77.8 | 84.7 | 97.9 | 90.1 |
| 797 | S3017 | Aspirin | COX | 110.2 | 113.4 | 100.5 | 87.2 |
| 798 | S4050 | Valganciclovir HCl | Anti-infection | 105.7 | 107.7 | 105.9 | 87.1 |
| 799 | S3032 | Bindarit | Immunology & Inflammation related | 102.8 | 104.9 | 106.8 | 89.0 |
| 800 | S4061 | Levobupivacaine HCl | Sodium Channel | 95.8 | 100.9 | 106.2 | 85.5 |
| 801 | S3047 | Otilonium Bromide | AChR | 14.2 | 32.5 | 84.3 | 49.4 |
| 802 | S4075 | Zinc Pyrithione | Proton Pump,Anti-infection | 14.5 | 27.8 | 30.1 | 21.5 |
| 803 | S3062 | Diclofenac Potassium | Immunology & Inflammation related | 115.9 | 104.2 | 96.9 | 105.2 |
| 804 | S4084 | Lomerizine 2HCl | Calcium Channel | 15.3 | 11.8 | 84.7 | 116.3 |
| 805 | S3077 | Tazobactam | Anti-infection | 82.3 | 109.5 | 102.3 | 98.9 |
| 806 | S4095 | Difluprednate | Others | 67.6 | 91.4 | 107.8 | 84.5 |
| 807 | S3113 | Pyridoxine HCl | Vitamin | 48.6 | 43.6 | 102.1 | 89.8 |
| 808 | S4110 | Estradiol Benzoate | Estrogen/progestogen Receptor | 71.7 | 85.3 | 99.0 | 93.9 |
| 809 | S3130 | Biotin (Vitamin B7) | Vitamin | 17.5 | 13.0 | 103.6 | 86.7 |
| 810 | S4122 | Tilmicosin | Anti-infection | 12.2 | 9.4 | 104.9 | 87.1 |
| 811 | S3150 | Articaine HCl | Others | 16.0 | 10.4 | 98.9 | 90.1 |
| 812 | S4138 | Dropropizine | Others | 13.1 | 10.5 | 105.3 | 90.8 |
| 813 | S3167 | Altrenogest | Estrogen/progestogen Receptor | 36.5 | 48.2 | 103.4 | 89.5 |
| 814 | S4155 | Chlorzoxazone | P450 (e.g. CYP17) | 130.5 | 120.2 | 109.6 | 93.8 |
| 815 | S3180 | Eletriptan HBr | 5-HT Receptor | 41.4 | 23.2 | 96.7 | 97.5 |
| 816 | S4170 | Coumarin | Immunology & Inflammation related | 100.4 | 97.0 | 108.8 | 96.6 |
| 817 | S3195 | Azlocillin sodium salt | Anti-infection | 94.5 | 45.5 | 100.8 | 87.6 |
| 818 | S4182 | Nifuroxazide | STAT | 12.9 | 37.0 | 46.0 | 57.8 |
| 819 | S3212 | Moclobemide (Ro 111163) | MAO | 108.1 | 112.8 | 104.4 | 91.3 |
| 820 | S4195 | Broxyquinoline | Anti-infection | 105.6 | 105.2 | 97.1 | 86.1 |
| 821 | S3647 | Mafenide Acetate | Carbonic Anhydrase | 110.4 | 117.0 | 102.1 | 89.9 |
| 822 | S4207 | Clofibric Acid | PPAR | 110.2 | 109.4 | 100.7 | 86.3 |
| 823 | S3673 | Sulfaphenazole | P450 (e.g. CYP17) | 111.2 | 121.6 | 104.9 | 102.4 |
| 824 | S4219 | Azaperone | Dopamine Receptor | 103.0 | 116.4 | 102.4 | 97.5 |
| 825 | S3711 | Carbasalate Calcium | Others | 116.8 | 99.5 | 98.7 | 106.9 |
| 826 | S4230 | Oxaprozin | COX | 64.0 | 57.9 | 82.2 | 88.7 |
| 827 | S3727 | Vilanterol Trifenate | Adrenergic Receptor | 47.2 | 59.3 | 86.3 | 82.9 |
| 828 | S4244 | Serotonin HCl | 5-HT Receptor | 60.9 | 75.7 | 99.7 | 98.8 |
| 829 | S3739 | Calcipotriene | Others | 41.6 | 28.9 | 102.4 | 95.8 |
| 830 | S4256 | Buspirone HCl | 5-HT Receptor | 31.5 | 22.0 | 101.9 | 86.3 |
| 831 | S3945 | L-Cycloserine | Transferase | 33.0 | 22.8 | 106.2 | 85.3 |
| 832 | S4269 | Vinorelbine Tartrate | Microtubule Associated | 12.4 | 9.7 | 83.5 | 82.8 |
| 833 | S4004 | Ethambutol 2HCl | Anti-infection | 15.7 | 13.5 | 96.2 | 92.3 |
| 834 | S4284 | Chloroprocaine HCl | Sodium Channel | 48.7 | 40.6 | 107.9 | 97.4 |
| 835 | S4019 | Avanafil | PDE | 101.9 | 104.5 | 96.8 | 89.1 |
| 836 | S4293 | Promethazine HCl | Histamine Receptor | 59.4 | 68.0 | 94.7 | 71.2 |
| 837 | S2830 | Clindamycin | Others | 64.5 | 76.4 | 94.2 | 96.1 |
| 838 | S4034 | Diphemanil Methylsulfate | AChR | 103.7 | 115.0 | 98.3 | 94.9 |
| 839 | S3000 | Carbazochrome sodium sulfonate (AC-17) | Others | 102.5 | 82.1 | 108.2 | 90.8 |
| 840 | S4043 | Tetrahydrozoline HCl | Adrenergic Receptor | 88.2 | 102.5 | 105.8 | 88.2 |
| 841 | S3018 | Niflumic acid | COX,GABA Receptor | 44.4 | 44.7 | 101.5 | 90.9 |
| 842 | S4051 | Nabumetone | COX | 90.1 | 93.2 | 65.5 | 80.4 |
| 843 | S3035 | Daunorubicin HCl | Topoisomerase | 12.9 | 9.7 | 40.8 | 26.0 |
| 844 | S4062 | Ronidazole | Anti-infection | 101.1 | 109.1 | 107.5 | 94.7 |
| 845 | S3051 | Bosentan Hydrate | Endothelin Receptor | 86.3 | 89.9 | 100.1 | 87.3 |
| 846 | S4076 | Propranolol HCl | Adrenergic Receptor | 96.9 | 115.6 | 100.2 | 80.4 |
| 847 | S3063 | Diclofenac Diethylamine | COX | 114.5 | 108.3 | 111.3 | 110.1 |
| 848 | S4085 | Levobetaxolol HCl | Adrenergic Receptor | 82.7 | 125.8 | 99.1 | 90.0 |
| 849 | S3078 | Beclomethasone dipropionate | Glucocorticoid Receptor | 66.0 | 89.9 | 101.3 | 90.4 |
| 850 | S4096 | Droperidol | Dopamine Receptor | 82.7 | 108.4 | 97.7 | 84.1 |
| 851 | S3114 | Vitamin C | Vitamin | 45.5 | 37.4 | 103.9 | 99.4 |
| 852 | S4111 | Dicloxacillin Sodium | Anti-infection | 32.6 | 22.7 | 106.7 | 82.8 |
| 853 | S3132 | Sulfamerazine | Anti-infection | 78.2 | 101.0 | 102.0 | 84.8 |
| 854 | S4123 | Timolol Maleate | Adrenergic Receptor | 32.3 | 21.7 | 100.0 | 92.1 |
| 855 | S3151 | Gliquidone | Potassium Channel | 29.9 | 19.2 | 103.6 | 90.7 |
| 856 | S4139 | Cyclizine 2HCl | Histamine Receptor | 17.5 | 15.3 | 99.5 | 87.7 |
| 857 | S3170 | Ampicillin sodium | Anti-infection | 108.1 | 118.5 | 96.7 | 90.1 |
| 858 | S4159 | Bezafibrate | PPAR | 110.9 | 118.6 | 96.4 | 89.7 |
| 859 | S3181 | Flumequine | Topoisomerase | 25.4 | 17.2 | 107.8 | 92.6 |
| 860 | S4171 | Choline Chloride | AChR | 94.8 | 101.8 | 98.1 | 94.6 |
| 861 | S3196 | Azacyclonol | 5-HT Receptor | 94.4 | 36.4 | 107.5 | 83.3 |
| 862 | S4184 | Penciclovir | Anti-infection | 106.7 | 110.0 | 104.7 | 93.1 |
| 863 | S3621 | Pazufloxacin mesylate | Anti-infection | 96.9 | 110.1 | 60.1 | 49.3 |
| 864 | S4196 | Ethacridine lactate monohydrate | Anti-infection | 13.7 | 13.6 | 29.8 | 29.4 |
| 865 | S3648 | Amlexanox | Immunology & Inflammation related | 57.5 | 43.9 | 96.2 | 88.0 |
| 866 | S4208 | Chromocarb | Others | 106.0 | 106.0 | 102.3 | 88.3 |
| 867 | S3684 | Methacholine chloride | AChR | 108.5 | 112.8 | 110.0 | 87.7 |
| 868 | S4221 | Benzbromarone | P450 (e.g. CYP17) | 72.9 | 113.6 | 104.6 | 110.7 |
| 869 | S3714 | Lifitegrast | Integrin | 110.3 | 111.3 | 102.7 | 101.2 |
| 870 | S4231 | Pilocarpine HCl | AChR | 77.5 | 107.9 | 103.4 | 99.6 |
| 871 | S3728 | Grazoprevir | HCV Protease | 57.0 | 60.6 | 86.9 | 95.3 |
| 872 | S4246 | Tranylcypromine (2-PCPA) HCl | MAO | 103.1 | 112.1 | 100.9 | 84.9 |
| 873 | S3741 | Benznidazole | Anti-infection | 24.8 | 32.4 | 96.1 | 90.6 |
| 874 | S4257 | Alizapride HCl | Dopamine Receptor | 50.7 | 44.7 | 96.9 | 84.6 |
| 875 | S3968 | Histamine | Histamine Receptor | 55.1 | 58.1 | 114.6 | 92.9 |
| 876 | S4270 | Oxiracetam | GABA Receptor | 31.4 | 21.5 | 105.0 | 94.6 |
| 877 | S4007 | Pentamidine isethionate | phosphatase | 12.6 | 9.1 | 48.7 | 65.7 |
| 878 | S4285 | Ospemifene | Estrogen/progestogen Receptor | 16.3 | 13.5 | 102.1 | 91.3 |
| 879 | S4020 | Sodium Picosulfate | Others | 88.6 | 108.9 | 99.1 | 88.9 |
| 880 | S4294 | Procainamide HCl | DNA Methyltransferase,Sodium Channel | 100.1 | 109.3 | 96.7 | 87.3 |
| 881 | S2853 | Carfilzomib (PR-171) | Proteasome | 26.3 | 18.3 | 89.4 | 93.2 |
| 882 | S4035 | Vitamin D2 | DNA/RNA Synthesis | 23.5 | 16.9 | 92.2 | 95.1 |
| 883 | S3001 | Clevudine | DNA/RNA Synthesis | 85.2 | 21.5 | 101.8 | 92.5 |
| 884 | S4044 | Toltrazuril | Anti-infection | 76.6 | 114.4 | 101.4 | 92.4 |
| 885 | S3021 | Rimonabant | Cannabinoid Receptor | 35.5 | 29.7 | 103.4 | 93.4 |
| 886 | S4053 | Sertraline HCl | 5-HT Receptor | 11.6 | 8.8 | 33.9 | 25.1 |
| 887 | S3036 | Pravastatin sodium | HMG-CoA Reductase | 78.2 | 94.8 | 109.4 | 84.8 |
| 888 | S4063 | Cholecalciferol  (Vitamin D3) | Vitamin | 24.3 | 16.7 | 104.5 | 84.7 |
| 889 | S3052 | Rupatadine Fumarate | Histamine Receptor | 25.3 | 20.3 | 83.8 | 89.8 |
| 890 | S4078 | Mefenamic Acid | COX | 106.3 | 118.1 | 109.9 | 94.0 |
| 891 | S3066 | Naloxone HCl | Opioid Receptor | 112.7 | 110.1 | 103.2 | 111.7 |
| 892 | S4086 | Loxapine Succinate | 5-HT Receptor,Dopamine Receptor | 36.8 | 47.3 | 89.5 | 91.1 |
| 893 | S3079 | Atovaquone | Anti-infection | 41.3 | 21.5 | 93.9 | 83.3 |
| 894 | S4098 | Halcinonide | Immunology & Inflammation related | 70.4 | 104.1 | 112.5 | 78.4 |
| 895 | S3116 | Sulfathiazole | Anti-infection | 50.2 | 45.3 | 99.6 | 85.6 |
| 896 | S4112 | Desvenlafaxine Succinate | Adrenergic Receptor,5-HT Receptor | 59.6 | 58.6 | 91.5 | 92.2 |
| 897 | S3133 | Sulfamethazine | Anti-infection | 55.1 | 58.8 | 110.2 | 90.7 |
| 898 | S4124 | Tolazoline HCl | Adrenergic Receptor | 30.5 | 21.2 | 106.1 | 94.4 |
| 899 | S3154 | Butenafine HCl | Anti-infection | 31.6 | 19.0 | 98.1 | 95.0 |
| 900 | S4141 | Dinitolmide | Anti-infection | 13.1 | 9.9 | 108.6 | 91.8 |
| 901 | S3172 | Anagrelide HCl | PDE | 77.1 | 91.1 | 96.0 | 96.5 |
| 902 | S4160 | Penicillin G Sodium | Anti-infection | 57.6 | 64.0 | 100.5 | 85.1 |
| 903 | S3183 | Amitriptyline HCl | 5-HT Receptor | 28.8 | 22.2 | 90.7 | 89.5 |
| 904 | S4172 | Cetylpyridinium Chloride | Anti-infection | 12.9 | 9.4 | 27.3 | 19.1 |
| 905 | S3199 | Reboxetine mesylate | Others | 106.3 | 106.4 | 96.8 | 94.1 |
| 906 | S4185 | Tiratricol | Others | 38.9 | 41.9 | 91.3 | 70.7 |
| 907 | S3635 | Medroxyprogesterone | Estrogen/progestogen Receptor | 60.3 | 33.1 | 103.0 | 86.9 |
| 908 | S4197 | Bemegride | GABA Receptor | 99.5 | 106.9 | 109.0 | 90.0 |
| 909 | S3655 | Cefepime Dihydrochloride Monohydrate | Anti-infection | 41.1 | 24.7 | 99.6 | 87.6 |
| 910 | S4209 | Chlorocresol | Calcium Channel | 99.7 | 98.1 | 105.7 | 91.4 |
| 911 | S3690 | Pargyline hydrochloride | MAO | 105.4 | 107.9 | 101.2 | 115.8 |
| 912 | S4222 | Piperacillin Sodium | Anti-infection | 104.9 | 109.1 | 105.1 | 118.3 |
| 913 | S3716 | Flibanserin | 5-HT Receptor | 109.8 | 106.4 | 97.5 | 111.2 |
| 914 | S4233 | Zoxazolamine | Others | 77.5 | 103.5 | 95.2 | 94.2 |
| 915 | S3729 | Iron sucrose | Others | 62.9 | 90.9 | 84.7 | 82.2 |
| 916 | S4247 | Prucalopride Succinate | 5-HT Receptor | 90.0 | 94.0 | 99.2 | 84.1 |
| 917 | S3742 | Cholic acid | Others | 50.0 | 69.5 | 95.9 | 92.7 |
| 918 | S4258 | Luliconazole | Anti-infection | 30.6 | 20.0 | 102.3 | 83.1 |
| 919 | S3980 | Pyridoxine | Vitamin | 96.7 | 102.3 | 108.8 | 88.2 |
| 920 | S4274 | Rotigotine | Dopamine Receptor | 33.8 | 40.3 | 103.4 | 93.6 |
| 921 | S4009 | Mirabegron | Adrenergic Receptor | 29.7 | 20.9 | 96.8 | 96.5 |
| 922 | S4286 | Anidulafungin (LY303366) | Anti-infection | 16.8 | 15.5 | 68.0 | 67.6 |
| 923 | S4021 | Tolcapone | Transferase | 90.2 | 79.3 | 104.9 | 98.9 |
| 924 | S4295 | Meclofenamate Sodium | COX | 74.4 | 85.7 | 67.5 | 71.9 |
| 925 | S2874 | Camostat Mesilate | Sodium Channel | 74.4 | 97.7 | 96.0 | 95.8 |
| 926 | S4037 | Doxapram HCl | Potassium Channel | 104.9 | 115.1 | 89.1 | 93.0 |
| 927 | S3002 | Rivaroxaban | Factor Xa | 107.7 | 96.4 | 87.3 | 81.1 |
| 928 | S4045 | Pheniramine Maleate | Histamine Receptor | 76.5 | 84.2 | 89.8 | 84.8 |
| 929 | S3022 | Cabazitaxel | Microtubule Associated | 31.7 | 21.7 | 88.8 | 82.2 |
| 930 | S4054 | Spironolactone | Androgen Receptor | 41.5 | 34.4 | 103.0 | 90.4 |
| 931 | S3037 | Bepotastine Besilate | Histamine Receptor | 36.1 | 22.7 | 105.1 | 94.0 |
| 932 | S4065 | Guanabenz Acetate | Adrenergic Receptor | 68.5 | 87.1 | 103.9 | 84.6 |
| 933 | S3053 | Azelnidipine | Calcium Channel | 133.4 | 125.5 | 97.4 | 83.1 |
| 934 | S4079 | Ticagrelor | P2 Receptor | 111.8 | 118.9 | 98.8 | 92.1 |
| 935 | S3067 | Chlorhexidine?2HCl | Anti-infection | 11.3 | 8.9 | 27.7 | 21.8 |
| 936 | S4088 | Flumethasone | Glucocorticoid Receptor | 66.9 | 113.8 | 105.7 | 82.3 |
| 937 | S3081 | Ulipristal | Estrogen/progestogen Receptor | 80.3 | 73.9 | 99.2 | 97.1 |
| 938 | S4099 | Dexlansoprazole | Proton Pump | 77.8 | 98.3 | 92.5 | 84.1 |
| 939 | S3117 | Oxybutynin chloride | AChR | 63.9 | 58.5 | 94.2 | 98.5 |
| 940 | S4113 | Desvenlafaxine | 5-HT Receptor,Adrenergic Receptor | 65.4 | 75.1 | 99.9 | 88.6 |
| 941 | S3137 | Sodium salicylate | NF-κB | 56.4 | 68.3 | 115.2 | 96.8 |
| 942 | S4125 | Sodium Phenylbutyrate | HDAC | 72.6 | 87.0 | 107.2 | 87.8 |
| 943 | S3155 | Mepivacaine HCl | Sodium Channel | 29.1 | 20.8 | 105.0 | 96.8 |
| 944 | S4147 | Azithromycin Dihydrate | Anti-infection | 12.6 | 9.6 | 101.0 | 90.1 |
| 945 | S3173 | Antipyrine | COX | 25.6 | 19.9 | 111.8 | 93.3 |
| 946 | S4162 | Benzethonium Chloride | AChR | 11.5 | 9.3 | 28.5 | 19.6 |
| 947 | S3185 | Adrenalone HCl | Adrenergic Receptor | 96.6 | 96.3 | 110.8 | 104.6 |
| 948 | S4175 | Sulfaguanidine | Anti-infection | 107.1 | 105.3 | 97.0 | 85.8 |
| 949 | S3200 | Triflusal | Thrombin | 107.5 | 103.0 | 110.0 | 96.5 |
| 950 | S4186 | Domiphen Bromide | Others | 12.0 | 8.9 | 27.9 | 19.5 |
| 951 | S3636 | Cefadroxil hydrate | Anti-infection | 122.2 | 110.6 | 117.7 | 97.0 |
| 952 | S4198 | Aminothiazole | Anti-infection | 106.2 | 107.5 | 99.1 | 96.3 |
| 953 | S3659 | Fludrocortisone acetate | Others | 62.4 | 94.1 | 103.4 | 86.9 |
| 954 | S4210 | Benzocaine | Sodium Channel | 105.3 | 100.6 | 102.6 | 88.8 |
| 955 | S3694 | Glucosamine hydrochloride | Others | 113.9 | 114.5 | 102.9 | 89.0 |
| 956 | S4223 | Mevastatin | HMG-CoA Reductase | 77.0 | 95.7 | 93.5 | 92.1 |
| 957 | S3717 | Testosterone Enanthate | Androgen Receptor | 86.6 | 65.7 | 99.9 | 127.3 |
| 958 | S4235 | Phenazopyridine HCl | Sodium Channel | 56.1 | 89.3 | 101.2 | 85.3 |
| 959 | S3730 | Metaxalone | Others | 69.1 | 92.9 | 102.7 | 88.1 |
| 960 | S4248 | Bromfenac Sodium | COX | 63.1 | 80.6 | 97.2 | 82.7 |
| 961 | S3743 | Oxiglutatione | Others | 50.6 | 72.5 | 102.9 | 93.9 |
| 962 | S4260 | Tamibarotene | Retinoid Receptor | 53.3 | 63.7 | 102.2 | 82.2 |
| 963 | S3997 | Oxaceprol | Immunology & Inflammation related | 57.1 | 69.6 | 105.9 | 87.6 |
| 964 | S4278 | Carteolol HCl | Adrenergic Receptor | 52.8 | 57.3 | 100.5 | 93.2 |
| 965 | S4010 | Acebutolol HCl | Adrenergic Receptor | 30.9 | 20.2 | 95.0 | 92.4 |
| 966 | S4288 | Chloroambucil | DNA/RNA Synthesis | 27.7 | 20.5 | 97.7 | 86.0 |
| 967 | S4022 | Probenecid | TRPV | 77.0 | 86.6 | 110.8 | 92.2 |
| 968 | S4296 | Salmeterol Xinafoate | Adrenergic Receptor | 44.4 | 57.6 | 87.5 | 85.2 |
| 969 | S2875 | Prucalopride | 5-HT Receptor | 102.3 | 102.9 | 97.1 | 89.5 |
| 970 | S4038 | Dibucaine HCl | Sodium Channel | 75.1 | 88.4 | 88.5 | 81.8 |
| 971 | S3005 | Paroxetine HCl | AChR,5-HT Receptor | 83.6 | 79.8 | 77.4 | 77.1 |
| 972 | S4046 | Estradiol Cypionate | Estrogen/progestogen Receptor | 20.6 | 65.0 | 87.9 | 73.3 |
| 973 | S3023 | Bufexamac | COX | 49.4 | 83.2 | 103.9 | 89.1 |
| 974 | S4056 | Retapamulin | Anti-infection | 62.3 | 81.9 | 61.2 | 62.8 |
| 975 | S3038 | Fosaprepitant dimeglumine salt | Others | 68.5 | 93.7 | 85.0 | 82.4 |
| 976 | S4068 | Tinidazole | Anti-infection | 92.9 | 100.0 | 102.8 | 83.3 |
| 977 | S3054 | Alverine Citrate | OX Receptor | 88.5 | 96.8 | 94.1 | 95.9 |
| 978 | S4080 | Triamterene | Sodium Channel | 91.2 | 92.8 | 101.6 | 103.7 |
| 979 | S3070 | Piracetam | GluR | 73.8 | 88.3 | 97.6 | 98.7 |
| 980 | S4089 | Halobetasol Propionate | Phospholipase (e.g. PLA) | 61.3 | 104.3 | 117.3 | 91.2 |
| 981 | S3083 | Indacaterol Maleate | Adrenergic Receptor | 39.5 | 58.9 | 94.2 | 89.8 |
| 982 | S4100 | Esmolol HCl | Adrenergic Receptor | 69.2 | 86.7 | 111.4 | 84.6 |
| 983 | S3120 | Doxepin HCl | Histamine Receptor | 60.6 | 83.7 | 99.5 | 84.3 |
| 984 | S4114 | Triclabendazole | Microtubule Associated | 36.3 | 42.9 | 107.4 | 92.0 |
| 985 | S3139 | Methenamine | Anti-infection | 50.4 | 62.2 | 106.0 | 93.7 |
| 986 | S4128 | Troxipide | Others | 37.4 | 39.5 | 101.6 | 93.8 |
| 987 | S3160 | Ethynodiol diacetate | Estrogen/progestogen Receptor | 45.8 | 27.3 | 103.8 | 92.3 |
| 988 | S4148 | Ampicillin Trihydrate | Anti-infection | 27.5 | 20.3 | 110.6 | 89.9 |
| 989 | S3175 | Atomoxetine HCl | 5-HT Receptor | 22.4 | 18.7 | 90.1 | 84.7 |
| 990 | S4164 | Doxofylline | PDE | 106.3 | 103.9 | 96.7 | 92.9 |
| 991 | S3186 | Azatadine dimaleate | Histamine Receptor | 100.2 | 99.2 | 105.3 | 96.5 |
| 992 | S4176 | Trometamol | COX | 105.9 | 99.8 | 102.3 | 92.1 |
| 993 | S3201 | Trifluoperazine 2HCl | Dopamine Receptor | 82.8 | 78.2 | 30.3 | 20.1 |
| 994 | S4189 | Cyclandelate | Others | 70.0 | 86.9 | 105.0 | 92.2 |
| 995 | S3637 | Cefpirome sulfate | Anti-infection | 89.2 | 102.4 | 101.2 | 87.6 |
| 996 | S4200 | Tolperisone HCl | Sodium Channel | 19.8 | 13.7 | 103.2 | 91.0 |
| 997 | S3663 | Afloqualone | GABA Receptor | 62.8 | 55.1 | 95.1 | 84.6 |
| 998 | S4211 | Montelukast Sodium | LTR | 84.3 | 82.0 | 97.7 | 92.1 |
| 999 | S3697 | Mafenide hydrochloride | Carbonic Anhydrase | 111.7 | 107.1 | 102.3 | 108.4 |
| 1000 | S4225 | Mexiletine HCl | Sodium Channel | 107.7 | 104.5 | 96.5 | 119.3 |
| 1001 | S3718 | Leuprolide Acetate | Estrogen/progestogen Receptor | 63.4 | 71.7 | 104.7 | 110.6 |
| 1002 | S4237 | Primaquine Diphosphate | Anti-infection | 27.6 | 30.3 | 99.6 | 79.7 |
| 1003 | S3731 | Tipiracil hydrochloride | Phosphorylase | 60.3 | 93.9 | 95.2 | 89.0 |
| 1004 | S4249 | Flopropione | 5-HT Receptor | 64.6 | 86.7 | 105.3 | 105.8 |
| 1005 | S3745 | Balsalazide disodium | Immunology & Inflammation related | 53.5 | 77.9 | 96.4 | 91.0 |
| 1006 | S4264 | Etofibrate | Others | 37.0 | 49.9 | 97.7 | 91.1 |
| 1007 | S4000 | Pergolide Mesylate | Dopamine Receptor | 28.5 | 22.1 | 99.9 | 84.5 |
| 1008 | S4279 | Demeclocycline HCl | Anti-infection | 25.8 | 30.8 | 60.7 | 56.0 |
| 1009 | S4011 | Ampiroxicam | COX | 15.0 | 9.6 | 104.9 | 90.9 |
| 1010 | S4289 | Metoclopramide HCl | Dopamine Receptor | 12.6 | 9.2 | 107.1 | 96.0 |
| 1011 | S4023 | Procaine HCl | NMDAR,Sodium Channel,AChR | 12.6 | 9.3 | 100.0 | 97.5 |
| 1012 | S4297 | Mupirocin | DNA/RNA Synthesis | 69.9 | 93.2 | 57.4 | 47.7 |
| 1013 | S2900 | Cobicistat (GS-9350) | P450 (e.g. CYP17) | 102.3 | 99.5 | 76.9 | 79.9 |
| 1014 | S4039 | Methazolamide | Carbonic Anhydrase | 99.1 | 99.4 | 104.1 | 97.1 |
| 1015 | S3008 | Zaltoprofen | COX | 103.2 | 89.9 | 102.5 | 102.4 |
| 1016 | S4047 | Bisacodyl | Others | 87.8 | 99.9 | 106.5 | 98.7 |
| 1017 | S3024 | Lamotrigine | Sodium Channel,5-HT Receptor | 96.9 | 98.9 | 103.9 | 95.1 |
| 1018 | S4057 | Methyclothiazide | Others | 102.6 | 108.1 | 101.9 | 98.1 |
| 1019 | S3043 | Rofecoxib | COX | 102.7 | 108.6 | 104.3 | 97.3 |
| 1020 | S4071 | Griseofulvin | Microtubule Associated | 34.6 | 73.2 | 99.1 | 91.4 |
| 1021 | S3057 | Azilsartan Medoxomil | RAAS | 115.1 | 117.4 | 97.8 | 91.5 |
| 1022 | S4081 | Sulfacetamide Sodium | Anti-infection,Autophagy | 112.2 | 105.5 | 106.2 | 109.9 |
| 1023 | S3074 | Chlorthalidone | Others | 83.3 | 96.4 | 101.3 | 119.2 |
| 1024 | S4090 | Fenspiride HCl | PDE | 70.0 | 101.1 | 99.7 | 93.3 |
| 1025 | S3104 | Moguisteine | Others | 69.0 | 100.7 | 105.8 | 92.9 |
| 1026 | S4101 | Voglibose | Others | 66.7 | 87.7 | 105.6 | 90.5 |
| 1027 | S3121 | Ornidazole | Anti-infection | 51.9 | 79.4 | 101.9 | 99.6 |
| 1028 | S4118 | Histamine 2HCl | Histamine Receptor | 54.4 | 79.0 | 109.5 | 106.5 |
| 1029 | S3140 | Milnacipran HCl | 5-HT Receptor | 32.1 | 29.4 | 113.5 | 95.3 |
| 1030 | S4131 | Levodropropizine | Histamine Receptor | 40.8 | 51.9 | 105.2 | 105.1 |
| 1031 | S3161 | Sertaconazole nitrate | Anti-infection | 16.8 | 9.8 | 54.6 | 50.4 |
| 1032 | S4149 | Amfenac Sodium Monohydrate | COX | 37.6 | 48.7 | 111.3 | 93.9 |
| 1033 | S3176 | Betahistine 2HCl | Histamine Receptor | 22.1 | 11.8 | 114.0 | 104.4 |
| 1034 | S4165 | Benzydamine HCl | Immunology & Inflammation related | 27.2 | 15.8 | 86.7 | 73.6 |
| 1035 | S3188 | (+,-)-Octopamine HCl | Dopamine Receptor | 104.0 | 101.9 | 106.8 | 110.1 |
| 1036 | S4178 | Climbazole | Anti-infection | 91.3 | 96.8 | 93.4 | 94.8 |
| 1037 | S3204 | Meptazinol HCl | Opioid Receptor | 107.2 | 103.8 | 103.9 | 105.2 |
| 1038 | S4190 | Cinchophen | Others | 58.1 | 84.1 | 106.4 | 99.9 |
| 1039 | S3638 | Cefamandole nafate | Anti-infection | 109.4 | 99.5 | 109.4 | 103.4 |
| 1040 | S4201 | Florfenicol | Anti-infection | 104.6 | 102.0 | 66.7 | 64.0 |
| 1041 | S3664 | Flupenthixol dihydrochloride | Dopamine Receptor,Adrenergic Receptor | 44.5 | 44.7 | 35.1 | 28.4 |
| 1042 | S4213 | Dirithromycin | Anti-infection | 98.6 | 101.8 | 99.0 | 100.5 |
| 1043 | S3698 | Nortriptyline hydrochloride | Others | 44.7 | 33.2 | 75.2 | 91.9 |
| 1044 | S4227 | Fidaxomicin | DNA/RNA Synthesis | 21.6 | 56.0 | 105.7 | 120.7 |
| 1045 | S3723 | Ramosetron Hydrochloride | 5-HT Receptor | 105.4 | 106.2 | 93.5 | 107.7 |
| 1046 | S4240 | Doxylamine Succinate | Histamine Receptor | 104.5 | 106.1 | 103.2 | 118.3 |
| 1047 | S3732 | Avibactam sodium | Anti-infection | 73.5 | 100.4 | 101.7 | 104.9 |
| 1048 | S4250 | Sulfamethoxypyridazine | Anti-infection | 98.5 | 106.8 | 103.9 | 95.2 |
| 1049 | S3746 | Lumefantrine | Anti-infection | 75.4 | 99.8 | 99.4 | 100.9 |
| 1050 | S4266 | Brimonidine Tartrate | Adrenergic Receptor | 61.4 | 81.6 | 103.3 | 109.2 |
| 1051 | S4001 | Cabozantinib malate (XL184) | TAM Receptor, VEGFR | 29.6 | 20.0 | 102.9 | 93.9 |
| 1052 | S4280 | Meclofenoxate (Centrophenoxine) HCl | Transferase | 37.5 | 30.0 | 120.0 | 108.9 |
| 1053 | S4012 | Desloratadine | Histamine Receptor | 27.6 | 19.4 | 92.2 | 94.6 |
| 1054 | S4290 | Digoxin | Sodium Channel | 26.6 | 18.9 | 107.9 | 79.9 |
| 1055 | S4024 | Homatropine Methylbromide | AChR | 33.1 | 22.7 | 115.3 | 106.6 |
| 1056 | S4299 | Dicoumarol | Others | 95.2 | 100.1 | 109.1 | 116.4 |
| 1057 | S4420 | Mefloquine HCl | Anti-infection | 13.1 | 10.1 | 29.9 | 28.6 |
| 1058 | S5007 | Delamanid | Anti-infection | 82.5 | 74.5 | 105.3 | 96.2 |
| 1059 | S4514 | Acetylleucine | Others | 116.9 | 110.9 | 114.4 | 102.1 |
| 1060 | S5027 | Mebeverine Hydrochloride | Others | 101.5 | 99.4 | 101.8 | 93.1 |
| 1061 | S4527 | Fenofibric acid | PPAR | 113.6 | 104.5 | 106.5 | 96.3 |
| 1062 | S5059 | Pixantrone Maleate | Topoisomerase | 26.4 | 19.5 | 75.8 | 62.2 |
| 1063 | S4539 | Salicylic acid | COX | 113.1 | 98.7 | 115.2 | 105.4 |
| 1064 | S5084 | Carbazochrome | Others | 113.3 | 94.9 | 112.1 | 96.8 |
| 1065 | S4553 | Bronopol | Anti-infection | 15.6 | 12.3 | 109.3 | 97.6 |
| 1066 | S6003 | Ataluren (PTC124) | CFTR | 106.3 | 111.2 | 110.6 | 95.3 |
| 1067 | S4564 | Diethylcarbamazine citrate | Anti-infection | 113.0 | 104.6 | 126.7 | 97.1 |
| 1068 | S7157 | Ilomastat (GM6001, Galardin) | MMP | 61.6 | 81.7 | 206.7 | 123.4 |
| 1069 | S4580 | Hydroquinone | ROS | 47.9 | 46.3 | 141.4 | 115.1 |
| 1070 | S7280 | Edoxaban | Factor Xa | 103.9 | 95.4 | 113.8 | 109.5 |
| 1071 | S4594 | Cephalothin | Anti-infection | 100.0 | 87.2 | 109.2 | 105.4 |
| 1072 | S7440 | Ribociclib (LEE011) | CDK | 36.5 | 30.8 | 108.8 | 91.1 |
| 1073 | S4607 | 2,2′-Dihydroxy-4-methoxybenzophenone | Others | 107.0 | 97.0 | 112.9 | 102.3 |
| 1074 | S7625 | Niraparib (MK-4827) tosylate | PARP | 40.3 | 23.6 | 99.6 | 94.0 |
| 1075 | S4623 | Methylbenactyzine Bromide | AChR | 92.7 | 74.3 | 114.4 | 118.0 |
| 1076 | S7765 | Dovitinib (TKI258) Lactate | FLT3,c-Kit,FGFR,PDGFR,VEGFR | 58.1 | 41.5 | 110.3 | 111.0 |
| 1077 | S4633 | Isosorbide Mononitrate | Others | 76.8 | 68.5 | 111.5 | 99.8 |
| 1078 | S7799 | Pexmetinib (ARRY-614) | p38 MAPK,Tie-2 | 40.6 | 25.6 | 94.6 | 66.7 |
| 1079 | S4641 | Tedizolid Phosphate | Anti-infection | 95.2 | 108.9 | 58.0 | 50.3 |
| 1080 | S7864 | Oltipraz | Nrf2 | 111.3 | 103.3 | 101.4 | 83.8 |
| 1081 | S4655 | Sulpiride | Dopamine Receptor | 108.2 | 109.2 | 106.8 | 97.1 |
| 1082 | S8021 | Vortioxetine (Lu AA21004) HBr | 5-HT Receptor | 57.7 | 12.9 | 44.3 | 25.6 |
| 1083 | S4664 | Molsidomine | Others | 112.8 | 106.5 | 110.4 | 93.1 |
| 1084 | S8103 | Sotagliflozin (LX4211) | SGLT | 103.5 | 94.0 | 107.8 | 92.0 |
| 1085 | S4678 | Povidone iodine | Anti-infection | 104.7 | 93.3 | 107.3 | 88.3 |
| 1086 | S8219 | Bitopertin | GlyT | 98.6 | 103.5 | 130.7 | 96.1 |
| 1087 | S4691 | Oxybenzone | Others | 103.2 | 102.2 | 114.9 | 93.3 |
| 1088 | S4820 | Diastase | Others | 110.0 | 111.8 | 116.2 | 97.0 |
| 1089 | S4731 | Perphenazine | Dopamine Receptor | 12.1 | 22.2 | 114.5 | 55.5 |
| 1090 | S3944 | Valproic acid | HDAC | 111.8 | 107.7 | 69.1 | 94.4 |
| 1091 | S4815 | L-Cysteine HCl | Others | 118.2 | 95.8 | 115.5 | 103.3 |
| 1092 | S4687 | Rivastigmine | AChR | 76.1 | 89.1 | 114.7 | 96.3 |
| 1093 | S4835 | Aceclofenac | Immunology & Inflammation related | 36.4 | 29.8 | 99.1 | 94.6 |
| 1094 | S4848 | Dalbavancin | Anti-infection | 105.8 | 107.4 | 101.6 | 111.0 |
| 1095 | S4896 | Elagolix Sodium | Estrogen/progestogen Receptor | 70.8 | 65.2 | 101.3 | 88.7 |
| 1096 | S4935 | Asunaprevir | HCV Protease | 73.1 | 79.4 | 59.5 | 105.9 |
| 1097 | S4502 | Eltrombopag | Thrombin | 42.9 | 27.0 | 83.6 | 87.1 |
| 1098 | S5009 | Brivudine | Anti-infection | 108.2 | 101.6 | 95.8 | 80.3 |
| 1099 | S4516 | (+)-Camphor | TRPV | 120.0 | 107.1 | 118.9 | 92.3 |
| 1100 | S5028 | 4-Aminopyridine | Potassium Channel | 110.2 | 89.4 | 107.3 | 89.8 |
| 1101 | S4528 | Furazolidone | Anti-infection | 101.1 | 84.2 | 65.4 | 66.8 |
| 1102 | S5062 | Daclatasvir Digydrochloride | HCV Protease | 61.1 | 57.6 | 74.7 | 80.7 |
| 1103 | S4541 | Triclosan | Anti-infection | 117.2 | 102.6 | 109.7 | 100.0 |
| 1104 | S5100 | Pralidoxime Iodide | AChR | 111.5 | 102.8 | 112.0 | 92.6 |
| 1105 | S4554 | Bucetin | Others | 115.7 | 102.6 | 106.1 | 85.5 |
| 1106 | S7007 | Binimetinib (MEK162, ARRY-162, ARRY-438162) | MEK | 99.5 | 100.2 | 117.1 | 96.1 |
| 1107 | S4565 | Diiodohydroxyquinoline | Anti-infection | 27.4 | 38.0 | 112.9 | 78.0 |
| 1108 | S7158 | abemaciclib (LY2835219) | CDK | 17.2 | 12.8 | 57.5 | 58.1 |
| 1109 | S4583 | Butamben | Others | 58.8 | 78.2 | 103.2 | 90.2 |
| 1110 | S7284 | Rociletinib (CO-1686, AVL-301) | EGFR | 26.5 | 24.3 | 98.5 | 85.5 |
| 1111 | S4595 | Cefazolin Sodium | Anti-infection | 100.3 | 90.0 | 98.5 | 96.2 |
| 1112 | S7492 | Uprosertib (GSK2141795) | Akt | 18.0 | 13.9 | 54.5 | 56.7 |
| 1113 | S4609 | Diflunisal | COX | 23.0 | 20.0 | 105.1 | 118.8 |
| 1114 | S7633 | Lomitapide Mesylate | Others | 11.3 | 8.2 | 28.6 | 21.4 |
| 1115 | S4625 | Alcaftadine | Histamine Receptor | 74.3 | 76.1 | 103.3 | 106.7 |
| 1116 | S7772 | Elacridar (GF120918) | P-gp | 89.0 | 94.7 | 86.8 | 97.7 |
| 1117 | S4634 | Sodium sulfadiazine | Anti-infection | 84.1 | 82.1 | 103.5 | 99.0 |
| 1118 | S7810 | Afatinib (BIBW2992) Dimaleate | EGFR, HER2 | 19.5 | 13.3 | 82.6 | 73.7 |
| 1119 | S4646 | Ciclesonide | Others | 19.7 | 16.2 | 66.6 | 37.5 |
| 1120 | S7910 | Epacadostat (INCB024360) | IDO | 93.7 | 106.1 | 103.1 | 77.1 |
| 1121 | S4656 | Parecoxib | COX | 95.7 | 101.3 | 112.5 | 86.6 |
| 1122 | S8022 | Empagliflozin (BI 10773) | SGLT | 114.5 | 101.7 | 102.1 | 84.9 |
| 1123 | S4665 | Rebeprazole sodium | Proton Pump | 102.1 | 98.1 | 105.0 | 79.0 |
| 1124 | S8116 | Acalabrutinib (ACP-196) | BTK | 98.8 | 95.0 | 100.7 | 79.8 |
| 1125 | S4679 | Terazosin HCl | Adrenergic Receptor | 115.5 | 106.5 | 105.3 | 80.0 |
| 1126 | S8241 | Ponesimod | S1P Receptor | 104.6 | 97.5 | 153.4 | 80.8 |
| 1127 | S4693 | Guanfacine Hydrochloride | Adrenergic Receptor | 95.8 | 95.8 | 111.1 | 88.8 |
| 1128 | S1717 | Fomepizole | Dehydrogenase | 108.0 | 106.9 | 115.4 | 93.1 |
| 1129 | S4733 | Retigabine | Potassium Channel | 104.6 | 96.5 | 116.3 | 101.4 |
| 1130 | S4521 | DEET | Anti-infection | 98.6 | 104.3 | 97.6 | 96.3 |
| 1131 | S4816 | Diatrizoate sodium | Others | 86.6 | 92.7 | 108.3 | 91.0 |
| 1132 | S4695 | D panthenol | Vitamin | 101.3 | 95.0 | 104.8 | 110.6 |
| 1133 | S4836 | Nilutamide | Androgen Receptor | 59.6 | 58.8 | 102.9 | 87.9 |
| 1134 | S4849 | Levocetirizine Dihydrochloride | Histamine Receptor | 101.5 | 102.5 | 99.2 | 98.2 |
| 1135 | S4897 | Nortropine Hydrochloride | Others | 105.1 | 99.7 | 110.5 | 97.0 |
| 1136 | S4975 | Fimasartan | RAAS | 93.3 | 85.3 | 100.8 | 89.3 |
| 1137 | S4503 | Calcium D-Panthotenate | Vitamin | 84.3 | 94.9 | 65.0 | 60.7 |
| 1138 | S5012 | Octenidine Dihydrochloride | Anti-infection | 11.8 | 9.2 | 26.9 | 20.2 |
| 1139 | S4517 | Cefotaxime sodium | Anti-infection | 115.1 | 111.0 | 108.0 | 86.6 |
| 1140 | S5030 | Dihydralazine sulphate | Others | 115.8 | 89.9 | 110.5 | 93.5 |
| 1141 | S4529 | Idramantone | Immunology & Inflammation related | 115.1 | 106.3 | 108.9 | 87.2 |
| 1142 | S5066 | Pramipexole dihydrochloride | Dopamine Receptor | 111.5 | 97.9 | 106.8 | 84.9 |
| 1143 | S4542 | Trihexyphenidyl hydrochloride | AChR | 105.1 | 96.7 | 95.5 | 80.2 |
| 1144 | S5206 | Benzylpenicillin potassium | Anti-infection | 118.3 | 105.6 | 112.3 | 88.6 |
| 1145 | S4555 | Carsalam | Anti-infection | 118.9 | 104.8 | 109.7 | 89.5 |
| 1146 | S7015 | Birinapant | IAP | 112.3 | 113.5 | 107.5 | 70.4 |
| 1147 | S4566 | DL-Panthenol | Others | 121.2 | 110.9 | 116.6 | 100.4 |
| 1148 | S7161 | Motolimod (VTX-2337) | TLR | 31.1 | 20.1 | 93.8 | 92.1 |
| 1149 | S4584 | Butylparaben | Anti-infection | 98.0 | 88.3 | 111.4 | 98.8 |
| 1150 | S7297 | Osimertinib (AZD9291) | EGFR | 11.1 | 8.9 | 28.6 | 21.9 |
| 1151 | S4596 | Cefixime | Anti-infection | 99.2 | 96.5 | 104.4 | 111.8 |
| 1152 | S7505 | (S)-crizotinib | MTH1 | 21.2 | 14.8 | 71.1 | 56.1 |
| 1153 | S4610 | Mebendazole | Anti-infection | 28.4 | 21.2 | 88.1 | 85.1 |
| 1154 | S7634 | Cerdulatinib (PRT062070, PRT2070) | JAK | 20.6 | 14.5 | 84.1 | 58.3 |
| 1155 | S4626 | Ethosuximide | Calcium Channel | 109.1 | 104.3 | 107.4 | 99.0 |
| 1156 | S7775 | Emricasan | Caspase | 94.1 | 81.2 | 114.0 | 94.1 |
| 1157 | S4635 | Cyproheptadine hydrochloride | 5-HT Receptor | 38.4 | 46.3 | 92.0 | 89.3 |
| 1158 | S7818 | Pexidartinib (PLX3397) | CSF-1R,c-Kit | 98.2 | 96.7 | 101.1 | 93.7 |
| 1159 | S4647 | Cefmenoxime hydrochloride | Anti-infection | 107.2 | 104.0 | 101.7 | 88.9 |
| 1160 | S7975 | Favipiravir (T-705) | DNA/RNA Synthesis | 105.8 | 101.4 | 103.0 | 87.9 |
| 1161 | S4657 | Eslicarbazepine Acetate | Others | 101.7 | 111.8 | 112.3 | 94.3 |
| 1162 | S8034 | Apremilast (CC-10004) | TNF-alpha,PDE | 105.5 | 94.8 | 111.8 | 85.5 |
| 1163 | S4666 | Sivelestat sodium tetrahydrate | Serine Protease | 104.4 | 98.0 | 102.1 | 92.1 |
| 1164 | S8134 | Radotinib | Bcr-Abl | 82.5 | 80.5 | 62.2 | 46.3 |
| 1165 | S4680 | Protirelin | Others | 110.0 | 103.0 | 110.2 | 93.2 |
| 1166 | S8266 | Melphalan | DNA alkylator | 67.3 | 49.9 | 117.0 | 82.4 |
| 1167 | S4696 | CarbinoxaMine Maleate | Histamine Receptor | 120.9 | 104.6 | 121.2 | 88.8 |
| 1168 | S1750 | Octocrylene | Others | 80.3 | 82.6 | 112.2 | 94.9 |
| 1169 | S4734 | Retigabine 2HCl | Potassium Channel | 77.6 | 83.6 | 116.1 | 114.4 |
| 1170 | S4570 | Halothane | Others | 110.5 | 107.6 | 109.7 | 97.3 |
| 1171 | S4817 | Atenolol | Adrenergic Receptor | 106.2 | 97.4 | 105.0 | 106.0 |
| 1172 | S4709 | Latanoprost | Immunology & Inflammation related, AR/RXR, GPR | 107.3 | 107.1 | 113.1 | 99.2 |
| 1173 | S4837 | Ibudilast | PDE | 68.8 | 68.6 | 111.7 | 108.1 |
| 1174 | S4852 | Gadopentetate Dimeglumine | Others | 116.5 | 116.7 | 113.4 | 101.3 |
| 1175 | S4898 | Sulfalozine sodium | Anti-infection | 121.1 | 105.2 | 111.1 | 103.3 |
| 1176 | S4976 | Sulfalene(SMPZ) | Others | 111.1 | 102.0 | 99.4 | 89.9 |
| 1177 | S4504 | 6-Mercaptopurine (6-MP) Monohydrate | DNA/RNA Synthesis | 37.7 | 30.4 | 97.5 | 86.4 |
| 1178 | S5013 | Ioversol | Others | 15.5 | 10.3 | 112.3 | 85.5 |
| 1179 | S4518 | Chloroxylenol | Anti-infection | 94.3 | 101.5 | 113.2 | 97.6 |
| 1180 | S5032 | Mephenesin | NMDAR | 108.9 | 97.6 | 104.7 | 89.7 |
| 1181 | S4530 | i-Inositol | Others | 103.2 | 96.2 | 107.6 | 89.2 |
| 1182 | S5070 | Mupirocin calcium | Anti-infection | 95.1 | 105.6 | 57.9 | 49.4 |
| 1183 | S4543 | Trimetazidine dihydrochloride | Others | 114.2 | 105.8 | 116.4 | 92.4 |
| 1184 | S5208 | Ciprofloxacin hydrochloride hydrate | Anti-infection | 112.5 | 106.8 | 67.7 | 49.9 |
| 1185 | S4556 | Carzenide | Others | 114.6 | 99.2 | 107.0 | 98.1 |
| 1186 | S7028 | Duvelisib (IPI-145, INK1197) | PI3K | 30.5 | 32.8 | 99.5 | 83.4 |
| 1187 | S4569 | Fluphenazine dihydrochloride | Dopamine Receptor | 11.8 | 9.3 | 115.0 | 48.2 |
| 1188 | S7179 | BAF312 (Siponimod) | S1P Receptor | 74.5 | 83.8 | 42.2 | 100.6 |
| 1189 | S4585 | Succinylsulfathiazole | Anti-infection | 117.7 | 103.7 | 111.1 | 97.1 |
| 1190 | S7326 | Tasisulam | Caspase | 51.0 | 39.9 | 116.0 | 90.5 |
| 1191 | S4597 | Lercanidipine hydrochloride | Calcium Channel | 26.5 | 11.9 | 71.3 | 84.6 |
| 1192 | S7521 | Afuresertib (GSK2110183) | Akt | 16.8 | 12.1 | 59.4 | 57.1 |
| 1193 | S4612 | Dapson | Anti-infection | 100.1 | 98.6 | 98.2 | 103.9 |
| 1194 | S7635 | Lomitapide | Others | 12.6 | 9.1 | 27.9 | 22.4 |
| 1195 | S4628 | (+/-)-Sulfinpyrazone | COX | 116.5 | 107.6 | 114.4 | 103.9 |
| 1196 | S7781 | Sunitinib | PDGFR,c-Kit,VEGFR | 16.3 | 10.5 | 60.6 | 51.6 |
| 1197 | S4636 | Teneligliptin hydrobromide | DPP-4 | 93.5 | 103.0 | 115.3 | 101.0 |
| 1198 | S7829 | CB1954 | DNA alkylator | 90.1 | 81.9 | 103.2 | 100.6 |
| 1199 | S4648 | Dantrolene sodium hemiheptahydrate | Calcium Channel | 17.8 | 13.7 | 96.5 | 91.6 |
| 1200 | S7977 | Napabucasin | STAT | 13.4 | 16.0 | 29.8 | 22.3 |
| 1201 | S4658 | Hydroquinidine | Others | 70.6 | 98.1 | 98.1 | 96.0 |
| 1202 | S8041 | Cobimetinib (GDC-0973, RG7420) | MEK | 33.8 | 9.8 | 44.6 | 47.0 |
| 1203 | S4667 | Lidocaine hydrochloride | EGFR | 95.2 | 94.8 | 112.6 | 86.2 |
| 1204 | S8135 | Riociguat (BAY 63-2521) | Others | 106.4 | 96.9 | 105.7 | 77.7 |
| 1205 | S4682 | Loxoprofen | Immunology & Inflammation related | 109.2 | 100.7 | 111.8 | 90.6 |
| 1206 | S8294 | Olmutinib (HM61713, BI 1482694) | EGFR, BTK | 18.3 | 13.3 | 49.5 | 38.7 |
| 1207 | S4699 | Etretinate | Retinoid Receptor | 73.1 | 76.4 | 113.7 | 98.6 |
| 1208 | S2023 | Propofol | GABA Receptor | 97.6 | 97.4 | 106.2 | 92.2 |
| 1209 | S4736 | Trapidil | PDGFR | 94.6 | 105.0 | 118.9 | 96.8 |
| 1210 | S4578 | Tyloxapol | Others | 103.4 | 111.4 | 93.1 | 86.7 |
| 1211 | S4819 | Saccharin | Others | 122.6 | 105.8 | 114.7 | 93.0 |
| 1212 | S4851 | Tafluprost | Others | 107.7 | 104.8 | 117.4 | 102.6 |
| 1213 | S4838 | Acotiamide hydrochloride | AChR | 93.4 | 80.6 | 94.1 | 89.2 |
| 1214 | S4854 | Bedaquiline fumarate | Microtubule Associated,AChR | 40.8 | 60.7 | 83.1 | 99.5 |
| 1215 | S4899 | Sulfogaiacol | Others | 116.4 | 109.3 | 102.9 | 105.7 |
| 1216 | S5002 | Fingolimod (FTY720) HCl | S1P Receptor | 12.4 | 9.6 | 28.8 | 22.7 |
| 1217 | S4505 | Vinblastine sulfate | Microtubule Associated,AChR | 13.6 | 10.6 | 90.2 | 89.2 |
| 1218 | S5015 | Simeprevir | HCV Protease | 12.9 | 9.4 | 99.4 | 75.0 |
| 1219 | S4519 | Citric acid trilithium salt tetrahydrate | Others | 54.2 | 87.4 | 106.8 | 95.3 |
| 1220 | S5033 | Terconazole | Anti-infection | 26.0 | 11.0 | 74.8 | 74.3 |
| 1221 | S4532 | Iopamidol | Others | 105.9 | 78.4 | 108.7 | 91.7 |
| 1222 | S5074 | Argatroban Monohydrate | Thrombin | 103.5 | 90.0 | 95.9 | 103.8 |
| 1223 | S4546 | Xylitol | Others | 93.7 | 88.8 | 101.8 | 86.5 |
| 1224 | S5209 | Enoxacin Sesquihydrate | Anti-infection | 113.6 | 102.3 | 112.4 | 89.0 |
| 1225 | S4558 | Citiolone | Others | 106.0 | 96.4 | 111.4 | 95.1 |
| 1226 | S7077 | Cilengitide?trifluoroacetate | Integrin | 99.7 | 98.5 | 94.5 | 78.7 |
| 1227 | S4571 | Hexylresorcinol | Tyrosinase | 102.1 | 90.9 | 121.6 | 101.3 |
| 1228 | S7215 | Losmapimod (GW856553X) | p38 MAPK | 92.4 | 79.2 | 100.8 | 91.6 |
| 1229 | S4588 | Docusate Sodium | Opioid Receptor | 102.6 | 97.0 | 98.8 | 96.0 |
| 1230 | S7358 | Poziotinib (HM781-36B) | HER2, EGFR | 92.3 | 79.7 | 77.9 | 91.0 |
| 1231 | S4601 | Clioquinol | Anti-infection | 65.6 | 79.4 | 43.7 | 59.4 |
| 1232 | S7523 | Entospletinib (GS-9973) | Syk | 98.3 | 65.2 | 100.2 | 85.9 |
| 1233 | S4617 | Dextromethorphan hydrobromide hydrate | AChR | 99.5 | 105.0 | 96.0 | 93.7 |
| 1234 | S7645 | Pilaralisib (XL147) | PI3K | 78.7 | 62.1 | 90.3 | 80.0 |
| 1235 | S4629 | Chlorotrianisene | Estrogen/progestogen Receptor | 72.4 | 76.3 | 97.1 | 90.5 |
| 1236 | S7782 | Dasatinib Monohydrate | Src,c-Kit,Bcr-Abl | 36.3 | 20.4 | 87.8 | 78.4 |
| 1237 | S4637 | Prasugrel Hydrochloride | P2 Receptor | 52.2 | 77.1 | 119.2 | 118.7 |
| 1238 | S7852 | Eliglustat | Others | 70.7 | 71.3 | 100.0 | 84.7 |
| 1239 | S4649 | Atipamezole hydrochloride | Adrenergic Receptor | 25.8 | 42.0 | 88.5 | 103.7 |
| 1240 | S7995 | Ripasudil (K-115) hydrochloride dihydrate | ROCK | 13.3 | 9.3 | 91.5 | 94.1 |
| 1241 | S4660 | Glycopyrrolate | AChR | 14.0 | 9.9 | 100.8 | 99.0 |
| 1242 | S8048 | Venetoclax (ABT-199, GDC-0199) | Bcl-2 | 13.4 | 9.6 | 60.9 | 39.3 |
| 1243 | S4668 | Procaine | Sodium Channel | 75.3 | 47.5 | 102.8 | 88.2 |
| 1244 | S8146 | Mitomycin C | DNA/RNA Synthesis | 12.4 | 9.1 | 31.8 | 25.6 |
| 1245 | S4683 | Sildenafil Mesylate | PDE | 91.9 | 78.2 | 107.8 | 88.5 |
| 1246 | S8432 | Troglitazone (CS-045) | PPAR | 105.3 | 96.7 | 120.4 | 80.4 |
| 1247 | S4714 | (-)-Menthol | Opioid Receptor | 61.7 | 91.7 | 100.1 | 94.4 |
| 1248 | S3669 | Carmustine | DNA/RNA Synthesis | 73.9 | 76.9 | 114.3 | 93.2 |
| 1249 | S4748 | Ondansetron Hydrochloride Dihydrate | 5-HT Receptor | 98.8 | 94.8 | 119.0 | 94.3 |
| 1250 | S4581 | Triacetin | Anti-infection | 102.6 | 97.4 | 103.7 | 90.7 |
| 1251 | S4830 | Maltose | Others | 107.8 | 94.8 | 116.3 | 100.3 |
| 1252 | S7684 | Salirasib | Rho | 91.9 | 91.1 | 103.3 | 90.3 |
| 1253 | S4839 | Mosapride | 5-HT Receptor | 103.1 | 91.3 | 105.6 | 79.9 |
| 1254 | S4869 | Sulfamethoxazole sodium | Anti-infection | 111.7 | 99.8 | 104.8 | 92.3 |
| 1255 | S4927 | Cyclen | Others | 53.9 | 37.5 | 81.3 | 59.8 |
| 1256 | S5003 | Tacrolimus (FK506) | mTOR | 71.2 | 63.0 | 101.8 | 103.6 |
| 1257 | S4506 | Acetazolamide | Carbonic Anhydrase | 12.7 | 9.6 | 106.0 | 100.4 |
| 1258 | S5017 | Oxyclozanide | Anti-infection | 14.0 | 9.3 | 115.4 | 59.9 |
| 1259 | S4522 | Dehydroacetic acid | Anti-infection | 115.9 | 101.9 | 113.8 | 98.0 |
| 1260 | S5039 | Actarit | Immunology & Inflammation related | 107.6 | 83.2 | 105.6 | 102.4 |
| 1261 | S4535 | Methylene Blue | Others | 23.5 | 18.2 | 93.6 | 93.7 |
| 1262 | S5075 | Acotiamide | AChR | 108.2 | 88.3 | 107.5 | 84.4 |
| 1263 | S4548 | Aminoguanidine hydrochloride | NOS | 109.1 | 93.2 | 111.0 | 88.2 |
| 1264 | S5210 | Sulfamethazine Sodium Salt | Anti-infection | 58.3 | 92.6 | 115.4 | 88.4 |
| 1265 | S4559 | Cloxiquine | Anti-infection | 23.8 | 11.6 | 61.2 | 67.6 |
| 1266 | S7083 | Ceritinib (LDK378) | ALK | 11.0 | 9.7 | 27.6 | 20.8 |
| 1267 | S4574 | Piperazine | GABA Receptor | 106.3 | 105.3 | 112.6 | 103.6 |
| 1268 | S7218 | Alvelestat (AZD9668) | Serine Protease | 113.1 | 96.1 | 95.1 | 81.4 |
| 1269 | S4589 | Amodiaquine dihydrochloride dihydrate | Transferase,Histone Methyltransferase | 58.7 | 58.8 | 98.9 | 83.8 |
| 1270 | S7393 | Aloxistatin | Cysteine Protease | 109.9 | 101.1 | 112.2 | 92.1 |
| 1271 | S4602 | Acetohydroxamic acid | Anti-infection | 95.9 | 79.8 | 104.2 | 93.4 |
| 1272 | S7550 | Erythromycin Cyclocarbonate | Anti-infection | 103.1 | 103.6 | 93.2 | 81.6 |
| 1273 | S4618 | Fenoldopam mesylate | Dopamine Receptor | 88.0 | 73.4 | 161.4 | 128.5 |
| 1274 | S7646 | Voxtalisib (XL765, SAR245409) | mTOR, PI3K | 19.2 | 13.0 | 86.6 | 84.7 |
| 1275 | S4630 | Diazoxide | Potassium Channel | 90.1 | 90.8 | 106.5 | 94.8 |
| 1276 | S7784 | Fumagillin | Anti-infection | 58.5 | 36.8 | 96.4 | 99.0 |
| 1277 | S4638 | Desogestrel | Estrogen/progestogen Receptor | 27.6 | 33.3 | 113.5 | 128.5 |
| 1278 | S7854 | Ulixertinib (BVD-523, VRT752271) | ERK | 72.5 | 57.8 | 143.7 | 117.1 |
| 1279 | S4650 | Atipamezole | Adrenergic Receptor | 14.1 | 9.9 | 108.1 | 96.0 |
| 1280 | S7998 | Entrectinib (RXDX-101) | Trk receptor,ALK | 29.7 | 25.8 | 32.3 | 21.4 |
| 1281 | S4661 | Tiagabine hydrochloride | GABA Receptor | 81.3 | 86.3 | 107.5 | 91.9 |
| 1282 | S8051 | Macitentan | Endothelin Receptor | 99.6 | 78.4 | 104.9 | 96.9 |
| 1283 | S4669 | Benzocaine hydrochloride | Sodium Channel | 86.7 | 70.0 | 111.3 | 95.5 |
| 1284 | S8183 | Pimavanserin | 5-HT Receptor | 11.9 | 9.0 | 30.5 | 21.4 |
| 1285 | S4685 | Efavirenz | Reverse Transcriptase | 90.4 | 91.4 | 88.1 | 76.8 |
| 1286 | S8558 | Tofogliflozin (CSG 452) | SGLT | 76.2 | 91.5 | 110.6 | 90.9 |
| 1287 | S4718 | Acetylcholine iodide | AChR | 45.3 | 87.9 | 107.9 | 92.1 |
| 1288 | S3681 | Vitamin E Acetate | Vitamin | 110.7 | 104.8 | 108.0 | 96.7 |
| 1289 | S4750 | Sulfacetamide sodium salt hydrate | Autophagy,Anti-infection | 99.7 | 105.2 | 112.0 | 98.8 |
| 1290 | S4599 | Benzyl benzoate | Others | 107.6 | 89.8 | 106.7 | 90.1 |
| 1291 | S4831 | Piperonyl butoxide | Others | 101.1 | 93.7 | 111.2 | 101.5 |
| 1292 | S4843 | Potassium acetate | Anti-infection | 106.1 | 97.8 | 106.6 | 93.4 |
| 1293 | S4877 | Eperisone hydrochloride | Others | 22.5 | 15.8 | 101.4 | 96.3 |
| 1294 | S4928 | Brivaracetam | Others | 108.2 | 100.9 | 115.2 | 106.5 |
| 1295 | S5004 | Pimecrolimus | Immunology & Inflammation related | 56.7 | 64.1 | 104.3 | 113.1 |
| 1296 | S4507 | 17-Hydroxyprogesterone | Estrogen/progestogen Receptor | 57.0 | 85.0 | 98.2 | 109.6 |
| 1297 | S5023 | Nadolol | Androgen Receptor | 100.1 | 99.2 | 107.1 | 90.4 |
| 1298 | S4525 | Ethylparaben | Anti-infection | 88.3 | 90.1 | 110.1 | 91.6 |
| 1299 | S5042 | Bevantolol hydrochloride | Adrenergic Receptor | 99.1 | 72.5 | 104.0 | 93.0 |
| 1300 | S4536 | Nitrofurantoin | Anti-infection | 95.4 | 80.6 | 62.8 | 59.4 |
| 1301 | S5077 | Regorafenib Monohydrate | VEGFR,PDGFR,c-Kit,c-RET,Raf | 17.2 | 12.2 | 102.6 | 82.9 |
| 1302 | S4550 | Azelaic acid | Anti-infection | 84.5 | 81.0 | 102.1 | 91.4 |
| 1303 | S5305 | Bromisoval | Others | 103.8 | 93.5 | 122.8 | 91.8 |
| 1304 | S4561 | Danthron | Others | 53.6 | 70.3 | 121.5 | 97.3 |
| 1305 | S7155 | Batimastat (BB-94) | MMP | 40.8 | 47.7 | 100.1 | 89.0 |
| 1306 | S4576 | Sulfabenzamide | Anti-infection | 96.1 | 82.9 | 115.6 | 100.7 |
| 1307 | S7252 | Selinexor (KPT-330) | CRM1 | 23.8 | 16.7 | 86.3 | 88.8 |
| 1308 | S4591 | Nitroxoline | Topoisomerase | 17.2 | 11.9 | 46.9 | 44.8 |
| 1309 | S7397 | Sorafenib | Raf | 19.6 | 21.3 | 101.8 | 97.3 |
| 1310 | S4603 | Gallic acid | ROS | 31.8 | 21.8 | 109.8 | 91.4 |
| 1311 | S7579 | Ledipasvir (GS5885) | HCV Protease | 52.5 | 46.5 | 75.1 | 61.9 |
| 1312 | S4619 | Itopride hydrochloride | AChR | 105.5 | 97.9 | 112.5 | 92.5 |
| 1313 | S7660 | Obeticholic Acid | FXR | 101.1 | 97.9 | 107.3 | 104.2 |
| 1314 | S4631 | Prochlorperazine dimaleate salt | Dopamine Receptor | 19.3 | 14.2 | 49.6 | 28.5 |
| 1315 | S7786 | Erlotinib | EGFR | 61.1 | 46.7 | 104.1 | 87.8 |
| 1316 | S4639 | Brexpiprazole | 5-HT Receptor,Dopamine Receptor | 103.2 | 92.2 | 103.3 | 102.0 |
| 1317 | S7856 | Tenofovir Alafenamide (GS-7340) | Reverse Transcriptase | 63.5 | 56.0 | 106.3 | 95.8 |
| 1318 | S4651 | Etoricoxib | COX | 14.2 | 9.5 | 113.1 | 102.7 |
| 1319 | S8001 | Ricolinostat (ACY-1215) | HDAC | 12.8 | 9.8 | 100.4 | 80.8 |
| 1320 | S4662 | Atazanavir | HIV Protease | 97.5 | 94.8 | 109.3 | 107.1 |
| 1321 | S8057 | Pacritinib (SB1518) | FLT3,JAK | 12.5 | 9.4 | 39.2 | 37.7 |
| 1322 | S4673 | Etonogestrel | Estrogen/progestogen Receptor | 67.0 | 71.0 | 95.0 | 84.0 |
| 1323 | S8195 | Oclacitinib?maleate | JAK | 93.5 | 77.9 | 99.4 | 85.3 |
| 1324 | S4689 | Deoxycholic acid | Others | 94.6 | 79.0 | 105.8 | 99.4 |
| 1325 | S8565 | Omarigliptin (MK-3102) | DPP-4 | 104.4 | 87.0 | 115.3 | 89.9 |
| 1326 | S4727 | Cinnarizine | Calcium Channel | 95.8 | 91.7 | 113.5 | 88.7 |
| 1327 | S3738 | Travoprost | Others | 61.3 | 68.5 | 125.3 | 96.2 |
| 1328 | S4751 | Cisapride hydrate | 5-HT Receptor | 68.9 | 62.4 | 112.2 | 86.2 |
| 1329 | S4675 | Tiagabine | GABA Receptor | 90.6 | 87.0 | 98.7 | 83.8 |
| 1330 | S4832 | Tolmetin | Immunology & Inflammation related | 90.8 | 85.1 | 97.5 | 85.1 |
| 1331 | S4844 | Cefcapene Pivoxil Hydrochloride | Anti-infection | 101.5 | 89.1 | 103.4 | 89.1 |
| 1332 | S4878 | Neticonazole Hydrochloride | Anti-infection | 30.0 | 39.1 | 96.2 | 80.9 |
| 1333 | S4931 | Propiverine hydrochloride | Others | 64.0 | 71.4 | 117.7 | 97.5 |
| 1334 | S5005 | Cefotiam hydrochloride | Anti-infection | 33.8 | 19.4 | 108.7 | 102.1 |
| 1335 | S4512 | Aceglutamide | Others | 16.8 | 10.2 | 106.0 | 107.5 |
| 1336 | S5025 | Efinaconazole | Anti-infection | 56.6 | 67.5 | 105.8 | 106.5 |
| 1337 | S4526 | Fenbufen | COX | 112.0 | 93.9 | 116.8 | 92.6 |
| 1338 | S5052 | Granisetron | 5-HT Receptor | 104.7 | 72.6 | 100.8 | 91.8 |
| 1339 | S4538 | Pantoprazole sodium | Proton Pump | 96.3 | 81.6 | 109.7 | 94.3 |
| 1340 | S5079 | Sitagliptin | DPP-4 | 103.1 | 84.3 | 117.9 | 96.3 |
| 1341 | S4552 | Bithionol | cAMP | 100.7 | 95.6 | 102.0 | 60.9 |
| 1342 | S5309 | Propyphenazone (4-Isopropylantipyrine) | Others | 107.9 | 89.7 | 119.2 | 96.8 |
| 1343 | S4562 | Dehydrocholic acid | Others | 106.2 | 88.0 | 119.4 | 104.9 |
| 1344 | S7156 | Marimastat (BB-2516) | MMP | 48.7 | 50.6 | 109.2 | 86.7 |
| 1345 | S4577 | Terpin hydrate | Others | 106.5 | 95.5 | 117.8 | 122.4 |
| 1346 | S7262 | Vidofludimus | Dehydrogenase | 25.5 | 17.4 | 95.4 | 99.8 |
| 1347 | S4593 | Chlormadinone acetate | Androgen Receptor,5-alpha Reductase | 53.9 | 59.2 | 105.9 | 108.7 |
| 1348 | S7417 | Puromycin 2HCl | Anti-infection | 12.2 | 9.0 | 32.9 | 26.7 |
| 1349 | S4604 | Levofloxacin hydrate | Topoisomerase | 62.9 | 62.3 | 71.7 | 55.7 |
| 1350 | S7605 | Filgotinib (GLPG0634) | JAK | 38.5 | 30.0 | 104.3 | 98.1 |
| 1351 | S4620 | Cefuroxime sodium | Anti-infection | 105.6 | 93.3 | 120.7 | 107.4 |
| 1352 | S7678 | Sacubitril/valsartan (LCZ696) | RAAS | 27.1 | 15.5 | 111.2 | 103.0 |
| 1353 | S4632 | Hexachlorophene | Potassium Channel | 26.7 | 18.6 | 155.6 | 148.8 |
| 1354 | S7787 | Docetaxel Trihydrate | Microtubule Associated | 33.0 | 20.0 | 111.0 | 97.9 |
| 1355 | S4640 | Lesinurad | Others | 32.0 | 19.7 | 109.6 | 104.1 |
| 1356 | S7858 | Dibutyryl-cAMP (Bucladesine) | PKA | 35.4 | 22.5 | 114.6 | 111.5 |
| 1357 | S4652 | Sulisobenzone | Others | 89.9 | 91.2 | 107.2 | 109.7 |
| 1358 | S8016 | Vonoprazan Fumarate (TAK-438) | Potassium Channel | 91.0 | 85.2 | 109.2 | 143.3 |
| 1359 | S4663 | Fusidate Sodium | Anti-infection | 91.9 | 90.7 | 65.2 | 55.4 |
| 1360 | S8067 | Vorapaxar | Estrogen/progestogen Receptor | 77.1 | 76.7 | 110.0 | 100.3 |
| 1361 | S4674 | Hydroxyprogesterone caproate | Estrogen/progestogen Receptor | 37.7 | 50.4 | 87.8 | 110.8 |
| 1362 | S8205 | Enasidenib (AG-221) | Dehydrogenase | 106.7 | 73.3 | 99.3 | 72.5 |
| 1363 | S4690 | Escin | Immunology & Inflammation related | 91.9 | 97.9 | 105.6 | 117.2 |
| 1364 | S8594 | Tirofiban Hydrochloride | Integrin | 93.9 | 85.8 | 255.3 | 110.8 |
| 1365 | S4729 | Tamsulosin hydrochloride | Adrenergic Receptor | 92.9 | 93.0 | 114.7 | 140.7 |
| 1366 | S3756 | Methyl salicylate | TRPV | 112.0 | 99.6 | 111.8 | 110.3 |
| 1367 | S4813 | Cefuroxime axetil | Anti-infection | 109.6 | 101.0 | 122.6 | 152.6 |
| 1368 | S4686 | Vitamin E | COX,VEGFR | 116.7 | 99.4 | 112.0 | 96.0 |
| 1369 | S4834 | Propantheline bromide | AChR | 101.9 | 95.5 | 110.0 | 98.7 |
| 1370 | S4847 | Faropenem Sodium | Anti-infection | 106.1 | 91.5 | 109.2 | 105.9 |
| 1371 | S4887 | Nikethamide | Others | 113.2 | 98.2 | 112.7 | 115.3 |
| 1372 | S4932 | Proxyphylline | Adenosine Receptor | 35.8 | 21.9 | 112.7 | 113.9 |
| 1373 | S5006 | Teprenone | Others | 39.0 | 23.0 | 106.1 | 118.4 |
| 1374 | S1046 | Vandetanib | VEGFR | 36.9 | 27.1 | 44.8 | 30.8 |
