# Supplementary material for: Nintedanib inhibits the VEGFR-ERK signaling pathway in human KRAS-mutated cancer cells
Source: Research Square preprint supplement (doi:10.21203/rs.3.rs-8370175/v1), 2025-12-18
Supplement: Supplementary file 2 [file 61c6be2302b7398410b715b5.docx]

Table S1. Upregulated genes in *KRAS*G12D cells

| **Gene Name** | **Description** | **Fold Change *KRAS*G12D VS parental** |
| --- | --- | --- |
| *MAGEA2B* | MAGE family member A2B | 420.5 |
| *MAGEA6* | MAGE family member A6 | 357.5 |
| *PAGE1* | PAGE family member 1 | 149.8 |
| *MAGEA12* | MAGE family member A12 | 98.5 |
| *MAGEA1* | MAGE family member A1 | 74.5 |
| *SAG1* | chondrosarcoma associated gene 1 | 57.7 |
| *CSAG4* | CSAG family member 4 (pseudogene) | 46.2 |
| *PECAM1* | platelet and endothelial cell adhesion molecule 1 | 38.6 |
| *ST8SIA4* | ST8 alpha-N-acetyl-neuraminide alpha-2,8-sialyltransferase 4 | 36.6 |
| *PRSS3* | serine protease 3 | 28.2 |
| *FSTL5* | follistatin like 5 | 27.0 |
| *PRSS3P2* | PRSS3 pseudogene 2 | 26.8 |
| *PAGE2B* | PAGE family member 2B | 24.6 |
| *F2RL1* | F2R like trypsin receptor 1 | 23.8 |
| *TMEM158* | transmembrane protein 158 | 23.4 |
| *SLC16A8* | solute carrier family 16 member 8 | 23.2 |
| *CDH6* | cadherin 6 | 21.6 |
| *PLXDC2* | plexin domain containing 2 | 21.4 |
| *PAGE2* | PAGE family member 2 | 20.4 |
| *CDH9* | cadherin 9 | 19.2 |
| *SLC6A15* | solute carrier family 6 member 15 | 17.0 |
| *HSD11B1* | hydroxysteroid 11-beta dehydrogenase 1 | 14.6 |
| *TMOD1* | tropomodulin 1 | 13.4 |
| *MIAT* | myocardial infarction associated transcript | 13.1 |
| *TFPI2* | tissue factor pathway inhibitor 2 | 12.9 |
| *SEMA3D* | semaphorin 3D | 12.8 |
| *BCHE* | butyrylcholinesterase | 12.4 |
| *PHACTR1* | phosphatase and actin regulator 1 | 12.2 |
| *SEMA3A* | semaphorin 3A | 12.1 |
| *RGS2* | regulator of G protein signaling 2 | 11.1 |
| *BRINP3* | BMP/retinoic acid inducible neural specific 3 | 10.8 |
| *HS3ST1* | heparan sulfate-glucosamine 3-sulfotransferase 1 | 10.8 |
| *SPRY1* | sprouty RTK signaling antagonist 1 | 10.8 |
| *ABCA6* | ATP binding cassette subfamily A member 6 | 10.4 |
| *TNNT1* | troponin T1, slow skeletal type | 9.7 |
| *ABCA8* | ATP binding cassette subfamily A member 8 | 9.6 |
| *LRRC15* | leucine rich repeat containing 15 | 9.4 |
| *VSNL1* | visinin like 1 | 8.9 |
| *KCNJ6* | potassium inwardly rectifying channel subfamily J member 6 | 8.7 |
| *SCG5* | secretogranin V | 8.4 |
| *AF132204* | None | 8.3 |
| *PCDH10* | protocadherin 10 | 8.3 |
| *AKR1C3* | aldo-keto reductase family 1 member C3 | 7.9 |
| *ACOX2* | acyl-CoA oxidase 2 | 7.5 |
|  |  |  |
| *SERPINE2* | serpin family E member 2 | 7.5 |
| *PDE7B* | phosphodiesterase 7B | 7.5 |
| *ITGA8* | integrin subunit alpha 8 | 7.4 |
| *ARG2* | arginase 2 | 7.2 |
| *STC1* | stanniocalcin 1 | 7.1 |
| *NPTX1* | neuronal pentraxin 1 | 7.0 |
| *TEX29* | testis expressed 29 | 6.9 |
| *C12orf56* | chromosome 12 open reading frame 56 | 6.8 |
| *CD33* | CD33 molecule | 6.6 |
| *ANKH* | ANKH inorganic pyrophosphate transport regulator | 6.6 |
| *STK38L* | serine/threonine kinase 38 like | 6.5 |
| *VEGFA* | vascular endothelial growth factor A | 6.5 |
| *KCNN4* | potassium calcium-activated channel subfamily N member 4 | 6.4 |
| *TRO* | trophinin | 6.4 |
| *FPR3* | formyl peptide receptor 3 | 6.4 |
| *FZD1* | frizzled class receptor 1 | 6.4 |
| *VCAN* | versican | 6.4 |
| *TNFRSF11B* | TNF receptor superfamily member 11b | 6.3 |
| *SPDL1* | spindle apparatus coiled-coil protein 1 | 6.2 |
| *SOD3* | superoxide dismutase 3 | 6.2 |
| *SGCA* | sarcoglycan alpha | 6.2 |
| *ACSM5* | acyl-CoA synthetase medium chain family member 5 | 6.1 |
| *ANTXR2* | ANTXR cell adhesion molecule 2 | 6.0 |
| *AHNAK2* | AHNAK nucleoprotein 2 | 6.0 |
| *HS3ST3A1* | heparan sulfate-glucosamine 3-sulfotransferase 3A1 | 5.9 |
| *CEP170* | centrosomal protein 170 | 5.9 |
| *PLEK2* | pleckstrin 2 | 5.9 |
| *PRUNE2* | prune homolog 2 with BCH domain | 5.8 |
| *TRIML2* | tripartite motif family like 2 | 5.8 |
| *TNC* | tenascin C | 5.8 |
| *JUP* | junction plakoglobin | 5.8 |
| *ANK3* | ankyrin 3 | 5.7 |
| *PROS1* | protein S | 5.6 |
| *PTGS1* | prostaglandin-endoperoxide synthase 1 | 5.6 |
| *DIO2* | iodothyronine deiodinase 2 | 5.5 |
| *MAN1A1* | mannosidase alpha class 1A member 1 | 5.5 |
| *EGR2* | early growth response 2 | 5.5 |
| *SYT7* | synaptotagmin 7 | 5.5 |
| *PLAU* | plasminogen activator, urokinase | 5.4 |
| *DPYSL3* | dihydropyrimidinase like 3 | 5.4 |
| *SPOCK3* | SPARC (osteonectin), cwcv and kazal like domains proteoglycan 3 | 5.4 |
| *NOX4* | NADPH oxidase 4 | 5.4 |
| *H2AFV* | H2A.Z variant histone 2 | 5.4 |
| *ATL1* | atlastin GTPase 1 | 5.4 |
| *LRRC17* | leucine rich repeat containing 17 | 5.4 |
| *WLS* | Wnt ligand secretion mediator | 5.4 |
| *RGS17* | regulator of G protein signaling 17 | 5.4 |
| *CSGALNACT1* | chondroitin sulfate N-acetylgalactosaminyltransferase 1 | 5.4 |
| *WDR66* | cilia and flagella associated protein 251 | 5.3 |
| *ITGA2* | integrin subunit alpha 2 | 5.3 |
| *AKAP12* | A-kinase anchoring protein 12 | 5.3 |
| *SLC27A3* | solute carrier family 27-member 3 | 5.3 |
| *GRK5* | G protein-coupled receptor kinase 5 | 5.3 |
| *PSD3* | pleckstrin and Sec7 domain containing 3 | 5.2 |
| *ZNF608* | zinc finger protein 608 | 5.2 |
| *SPOCK1* | SPARC (osteonectin), cwcv and kazal like domains proteoglycan 1 | 5.2 |
| *TMEM65* | transmembrane protein 65 | 5.1 |
| *SFRP1* | secreted frizzled related protein 1 | 5.1 |
| *FOXL2NB* | FOXL2 neighbor | 5.1 |
| *TMEM26* | transmembrane protein 26 | 5.1 |
| *SVEP1* | sushi, von Willebrand factor type A, EGF and pentraxin domain containing 1 | 5.0 |

Upregulated genes by KRASG12D indicated based on the differential expression (fold change) in *KRAS*G12D cells versus parent cells (fold change>5)
