# Supplementary material for: Nintedanib inhibits the VEGFR-ERK signaling pathway in human KRAS-mutated cancer cells
Source: Research Square preprint supplement (doi:10.21203/rs.3.rs-8370175/v1), 2025-12-18
Supplement: Supplementary file 3 [file 7f818f0d575a11f378c6f7c3.docx]

| **No** | **Product Name** | **Target** | **Sachi**  **(% cells)** | **SachiG12A**  **(% cells)** | **HPNE**  **(% cells)** | **HPNEG12D**  **(% cells)** |
| --- | --- | --- | --- | --- | --- | --- |
| 1 | Axitinib | c-Kit, PDGFR, VEGFR | 55.0 | 28.7 | 91.0 | 72.1 |
| 2 | Nintedanib | FGFR, PDGFR, VEGFR | 91.4 | 53.2 | 46.4 | 21.3 |
| 3 | Cediranib | VEGFR | 45.6 | 16.4 | 73.5 | 56.8 |
| 4 | Pazopanib HCl | c-Kit, PDGFR, VEGFR | 71.9 | 90.4 | 85.7 | 60.0 |
| 5 | Sorafenib Tosylate | PDGFR, Raf, VEGFR | 105.8 | 108.8 | 107.5 | 80.5 |
| 6 | Sunitinib Malate | c-Kit, PDGFR, VEGFR | 14.5 | 11.0 | 53.9 | 37.5 |
| 7 | Vatalanib | VEGFR | 32.8 | 29.7 | 75.2 | 61.0 |
| 8 | Foretinib | c-Met, VEGFR | 23.7 | 23.5 | 33.9 | 18.8 |
| 9 | Cabozantinib | c-Met, VEGFR | 29.6 | 20.0 | 102.9 | 93.9 |
| 10 | Lenvatinib | VEGFR | 24.6 | 18.5 | 104.9 | 80.2 |
| 11 | Regorafenib | c-RET, VEGFR | 27.1 | 19.8 | 91.4 | 67.0 |
| 12 | Tivozanib | c-Kit, PDGFR, VEGFR | 36.0 | 58.1 | 76.1 | 70.9 |
| 13 | Ponatinib | BcrAbl, FGFR, PDGFR, VEGFR | 20.3 | 15.2 | 44.5 | 37.6 |
| 14 | Pazopanib | c-Kit, PDGFR, VEGFR | 107.2 | 104.3 | 87.3 | 95.2 |
| 15 | Cabozantinib malate | TAM Receptor, VEGFR | 34.0 | 22.4 | 102.9 | 93.9 |
| 16 | Regorafenib Monohydrate | VEGFR, PDGFR, c-Kit, c-RET, Raf | 17.2 | 12.2 | 102.6 | 82.9 |
| 17 | Dovitinib | FLT3, cKit, FGFR, PDGFR, VEGFR | 58.1 | 41.5 | 110.3 | 111.0 |
| 18 | Sunitinib | PDGFR, c-Kit, VEGFR | 16.3 | 10.5 | 60.6 | 51.6 |
| 19 | Vitamin E | COX, VEGFR | 116.7 | 99.4 | 112.0 | 96.0 |
| 20 | Vandetanib | VEGFR | 36.9 | 27.1 | 44.8 | 30.8 |
| 21 | Linifanib | CSF-1R, PDGFR, VEGFR | 95.2 | 101.9 | 99.4 | 86.8 |

Table S4. Effect of 22 VEGFR inhibitors on the proliferation of *KRAS*G12D and *KRAS*WT cells.
