# Supplementary material for: Nintedanib inhibits the VEGFR-ERK signaling pathway in human KRAS-mutated cancer cells
Source: Research Square preprint supplement (doi:10.21203/rs.3.rs-8370175/v1), 2025-12-18
Supplement: Supplementary file 4 [file 8229a43896849f1f46d8038e.docx]

Table S5. IC50 values of cell lines used in this study

|  |  | *KRAS* | IC50 (μM) | | |
| --- | --- | --- | --- | --- | --- |
| Cell line | Cell type | gene status | Nintedanib | Axitinib | Motesanib |
|  |  |  |  |  |  |
| HPNE | pancreatic normal ductal epithelium | WT | 15.9 | 20> |  |
| HPNE/*KRAS*G12D | G12D | 3.1 | 20> | 20> |
| HBEC | bronchial normal epithelium | WT | 20> | 20> | 20> |
| HBEC/*KRAS*G12D | G12D | 2.8 | 20> | 20> |
| Sachi | MM | WT | 20> | 20> | 20> |
| Sachi/*KRAS*G12A | MM | G12A | 2.7 | 20> | 20> |
| A549 | alveolar basal epithelial carcinoma | G12D | 3.0 | 7.2 | 20> |
| Lu-99A | giant cell carcinoma | G12C | 2.5 | 6.4 | 19.5 |
| DLD1 | CRC | G13D | 6.8 | 7.9 | 18.0 |
| SW-480 | CRC | G12V | 4.1 | 20> | 20> |
| HCT116 | CRC | G13D | 2.3 | 4.9 | 20> |
| PL5 | PDAC | G12D | 3.1 | 18.1 | 20> |
| PL8 | PDAC | G12D | 2.9 | 12.1 | 20> |
| AsPc-1 | PDAC | G12D | 4.3 | 20> | 20> |

*CRC, colorectal PDAC, pancreatic ductal carcinoma; MM, multiple myeloma

Analysis: Origin 2021b
