# Supplementary material for: Nintedanib inhibits the VEGFR-ERK signaling pathway in human KRAS-mutated cancer cells
Source: Research Square preprint supplement (doi:10.21203/rs.3.rs-8370175/v1), 2025-12-18
Supplement: Supplementary file 5 [file 8b375c76688c59b9a2af3c5a.docx]

Table S6. Summary of immunohistochemistry in this study

| Cases  No. | Age | Sex | Organ/ Anatomic Site | Pathology diagnosis | Grade | Stage | Type | VEGFR2 |
| --- | --- | --- | --- | --- | --- | --- | --- | --- |
| 1 | 41 | F | Pancreas | Duct adenocarcinoma | 1 | IIB | Malignant | 1 |
| 2 | 65 | M | Pancreas | Duct adenocarcinoma | 1 | IIA | Malignant | 2 |
| 3 | 58 | F | Pancreas | Duct adenocarcinoma | 1 | IB | Malignant | 2 |
| 4 | 72 | F | Pancreas | Duct adenocarcinoma | 1 | IIA | Malignant | 2 |
| 5 | 60 | M | Pancreas | Duct adenocarcinoma | 1 | IIA | Malignant | 2 |
| 6 | 41 | F | Pancreas | Duct adenocarcinoma | 1 | IIA | Malignant | 2 |
| 7 | 65 | M | Pancreas | Duct adenocarcinoma | 1 | IIA | Malignant | 2 |
| 8 | 58 | F | Pancreas | Duct adenocarcinoma | - | IB | Malignant | 2 |
| 9 | 72 | F | Pancreas | Duct adenocarcinoma | 1 | IIA | Malignant | 2 |
| 10 | 60 | M | Pancreas | Duct adenocarcinoma | 1 | IIA | Malignant | 2 |
| 11 | 52 | M | Pancreas | Duct adenocarcinoma | 1 | IIB | Malignant | 2 |
| 12 | 65 | M | Pancreas | Duct adenocarcinoma with cataplasia | 2 | IIB | Malignant | 0 |
| 13 | 41 | M | Pancreas | Duct adenocarcinoma | 2 | IB | Malignant | 1 |
| 14 | 44 | M | Pancreas | Duct adenocarcinoma | 2 | IIA | Malignant | 1 |
| 15 | 55 | F | Pancreas | Duct adenocarcinoma | 1 | IB | Malignant | 1 |
| 16 | 52 | M | Pancreas | Duct adenocarcinoma | 1 | IIB | Malignant | 2 |
| 17 | 65 | M | Pancreas | Duct adenocarcinoma with cataplasia | 2 | IIB | Malignant | 0 |
| 18 | 41 | M | Pancreas | Duct adenocarcinoma | 2 | IB | Malignant | 1 |
| 19 | 44 | M | Pancreas | Duct adenocarcinoma | 2 | IIA | Malignant | 1 |
| 20 | 55 | F | Pancreas | Duct adenocarcinoma | 1 | IB | Malignant | 1 |
| 21 | 55 | M | Pancreas | Duct adenocarcinoma | 1 | IIA | Malignant | 0 |
| 22 | 55 | M | Pancreas | Duct adenocarcinoma | 2 | IB | Malignant | 0 |
| 23 | 34 | M | Pancreas | Duct adenocarcinoma | 2 | IIA | Malignant | 1 |
| 24 | 42 | M | Pancreas | Duct adenocarcinoma | 1 | IIA | Malignant | 1 |
| 25 | 44 | M | Pancreas | Duct adenocarcinoma | 3 | IIA | Malignant | 1 |
| 26 | 55 | M | Pancreas | Duct adenocarcinoma | 1 | IIA | Malignant | 2 |
| 27 | 55 | M | Pancreas | Duct adenocarcinoma | 2 | IB | Malignant | 1 |
| 28 | 34 | M | Pancreas | Duct adenocarcinoma | 2 | IIA | Malignant | 2 |
| 29 | 42 | M | Pancreas | Duct adenocarcinoma | 2 | IIA | Malignant | 2 |
| 30 | 44 | M | Pancreas | Duct adenocarcinoma | 3 | IIA | Malignant | 2 |
| 31 | 59 | M | Pancreas | Duct adenocarcinoma | 2 | IIA | Malignant | 2 |
| 32 | 53 | M | Pancreas | Duct adenocarcinoma | 3 | IIA | Malignant | 0 |
| 33 | 52 | M | Pancreas | Duct adenocarcinoma | 2 | IIA | Malignant | 1 |
| 34 | 48 | F | Pancreas | Duct adenocarcinoma | 2 | IIA | Malignant | 1 |
| 35 | 68 | F | Pancreas | Duct adenocarcinoma | 3 | IIA | Malignant | 1 |
| 36 | 59 | M | Pancreas | Duct adenocarcinoma | 2 | IIA | Malignant | 2 |
| 37 | 53 | M | Pancreas | Duct adenocarcinoma | 2 | IIA | Malignant | 1 |
| 38 | 52 | M | Pancreas | Duct adenocarcinoma | 2 | IIA | Malignant | 3 |
| 39 | 48 | F | Pancreas | Duct adenocarcinoma | 2 | IIA | Malignant | 2 |
| 40 | 68 | F | Pancreas | Duct adenocarcinoma | 3 | IIA | Malignant | 1 |
| 41 | 41 | M | Pancreas | Duct adenocarcinoma | 3 | III | Malignant | 1 |
| 42 | 64 | M | Pancreas | Duct adenocarcinoma | 3 | IIA | Malignant | 1 |
| 43 | 58 | F | Pancreas | Duct adenocarcinoma | 3 | IIA | Malignant | 1 |
| 44 | 60 | F | Pancreas | Duct adenocarcinoma | 3 | III | Malignant | 1 |
| 45 | 72 | F | Pancreas | Duct adenocarcinoma | 3 | IIA | Malignant | 2 |
| 46 | 41 | M | Pancreas | Duct adenocarcinoma | 3 | III | Malignant | 2 |
| 47 | 64 | M | Pancreas | Duct adenocarcinoma | 3 | IIA | Malignant | 2 |
| 48 | 58 | F | Pancreas | Duct adenocarcinoma | 1 | IIA | Malignant | 1 |
| 49 | 60 | F | Pancreas | Duct adenocarcinoma | 3 | III | Malignant | 2 |
| 50 | 72 | F | Pancreas | Duct adenocarcinoma | 3 | IIA | Malignant | 2 |
| 51 | 56 | M | Pancreas | Duct adenocarcinoma | 3 | IIB | Malignant | 0 |
| 52 | 63 | M | Pancreas | Duct adenocarcinoma | 3 | IB | Malignant | 1 |
| 53 | 62 | M | Pancreas | Duct adenocarcinoma | 3 | IB | Malignant | 1 |
| 54 | 59 | M | Pancreas | Duct adenocarcinoma | 3 | IB | Malignant | 1 |
| 55 | 60 | F | Pancreas | Duct adenocarcinoma | 3 | IV | Malignant | 2 |
| 56 | 56 | M | Pancreas | Duct adenocarcinoma | 3 | IIB | Malignant | 1 |
| 57 | 63 | M | Pancreas | Duct adenocarcinoma | 3 | IB | Malignant | 2 |
| 58 | 62 | M | Pancreas | Duct adenocarcinoma | 3 | IB | Malignant | 2 |
| 59 | 59 | M | Pancreas | Duct adenocarcinoma | 3 | IB | Malignant | 2 |
| 60 | 60 | F | Pancreas | Duct adenocarcinoma | 3 | IV | Malignant | 2 |
| 61 | 53 | F | Pancreas | Duct adenocarcinoma | 3 | IIA | Malignant | 0 |
| 62 | 50 | M | Pancreas | Duct adenocarcinoma | 3 | IIB | Malignant | 0 |
| 63 | 51 | M | Pancreas | Duct adenocarcinoma | 3 | IIA | Malignant | 0 |
| 64 | 62 | F | Pancreas | Duct adenocarcinoma | 3 | IIA | Malignant | 1 |
| 65 | 78 | M | Pancreas | Duct adenocarcinoma | 3 | IB | Malignant | 2 |
| 66 | 53 | F | Pancreas | Duct adenocarcinoma | 3 | IIA | Malignant | 2 |
| 67 | 50 | M | Pancreas | Duct adenocarcinoma | 3 | IIB | Malignant | 1 |
| 68 | 51 | M | Pancreas | Duct adenocarcinoma | 3 | IIA | Malignant | 1 |
| 69 | 62 | F | Pancreas | Duct adenocarcinoma | 3 | IIA | Malignant | 1 |
| 70 | 78 | M | Pancreas | Duct adenocarcinoma | 3 | IB | Malignant | 2 |
| 71 | 39 | F | Pancreas | Duct adenocarcinoma | 3 | IIA | Malignant | 0 |
| 72 | 55 | M | Pancreas | Duct adenocarcinoma | 3 | IB | Malignant | 1 |
| 73 | 76 | F | Pancreas | Duct adenocarcinoma | 3 | III | Malignant | 2 |
| 74 | 76 | M | Pancreas | Duct adenocarcinoma | 3 | IIA | Malignant | 0 |
| 75 | 57 | F | Pancreas | Duct adenocarcinoma | 3 | IB | Malignant | 1 |
| 76 | 39 | F | Pancreas | Duct adenocarcinoma | 3 | IIA | Malignant | 2 |
| 77 | 55 | M | Pancreas | Duct adenocarcinoma | 3 | IB | Malignant | 2 |
| 78 | 76 | F | Pancreas | Duct adenocarcinoma with necrosis | 3 | III | Malignant | 2 |
| 79 | 76 | M | Pancreas | Duct adenocarcinoma | 3 | IIA | Malignant | 0 |
| 80 | 57 | F | Pancreas | Duct adenocarcinoma | 3 | IB | Malignant | 0 |
| 81 | 40 | M | Pancreas | Pancreas tissue | - | - | Normal | 0 |
| 82 | 47 | M | Pancreas | Pancreas tissue | - | - | Normal | 0 |
| 83 | 25 | M | Pancreas | Pancreas tissue | - | - | Normal | 0 |
| 84 | 30 | M | Pancreas | Pancreas tissue | - | - | Normal | 1 |
| 85 | 30 | M | Pancreas | Pancreas tissue | - | - | Normal | 0 |
| 86 | 40 | M | Pancreas | Pancreas tissue | - | - | Normal | 0 |
| 87 | 47 | M | Pancreas | Pancreas tissue | - | - | Normal | 0 |
| 88 | 25 | M | Pancreas | Pancreas tissue | - | - | Normal | 1 |
| 89 | 30 | M | Pancreas | Pancreas tissue | - | - | Normal | 2 |
| 90 | 30 | M | Pancreas | Pancreas tissue | - | - | Normal | 1 |
| 91 | 50 | M | Pancreas | Pancreas tissue | - | - | Normal | 0 |
| 92 | 35 | M | Pancreas | Pancreas tissue | - | - | Normal | 0 |
| 93 | 38 | M | Pancreas | Pancreas tissue | - | - | Normal | 0 |
| 94 | 35 | F | Pancreas | Pancreas tissue | - | - | Normal | 0 |
| 95 | 21 | F | Pancreas | Pancreas tissue | - | - | Normal | 0 |
| 96 | 50 | M | Pancreas | Pancreas tissue | - | - | Normal | 0 |
| 97 | 35 | M | Pancreas | Pancreas tissue | - | - | Normal | 0 |
| 98 | 38 | M | Pancreas | Pancreas tissue | - | - | Normal | 0 |
| 99 | 35 | F | Pancreas | Pancreas tissue | - | - | Normal | 0 |
| 100 | 21 | F | Pancreas | Pancreas tissue | - | - | Normal | 0 |
