# Supplementary material for: Nintedanib inhibits the VEGFR-ERK signaling pathway in human KRAS-mutated cancer cells
Source: Research Square preprint supplement (doi:10.21203/rs.3.rs-8370175/v1), 2025-12-18
Supplement: Supplementary file 6 [file 96e78f7e77c8ce8e5797d20a.docx]

Table S8. Antibodies used in this study

| **Molecule** | **Cat number** | **Company** | **Species** | **Dilution** |
| --- | --- | --- | --- | --- |
| p-VEGFR1 | AF4170 | R&D | Rb | ×1000 |
| VEGFR1 | A11127 | ABclonal | Rb | ×1000 |
| P-VEGFR2 | AP0382 | ABclonal | Rb | ×1000 |
| VEGFR2 | A5609 | CST | Rb | ×1000 |
| p-ERK1/2 | #9101 | CST | Rb | ×1000 |
| ERK | 4370 | CST | Rb | ×1000 |
| p-AKT | #4060 | CST | Rb | ×1000 |
| AKT | 9272 | CST | M | ×1000 |
| p-DRP1 | #3455 | CST | Rb | ×1000 |
| DRP1 | 12957-1-AP | Proteintech | Rb | x 1000 |
| C-caspas3 | #9664 | CST | Rb | ×1000 |
| SOS1 | BT-AP14373 | BT LAP | Rb | ×1000 |
| KRAS | 05-516 | MERCK | M | ×1000 |
| Bcl2 | #2872 | CST | Rb | ×1000 |
| Bax | #2772 | CST | Rb | ×1000 |
| GAPDH | #2118 | CST | Rb | x 3000 |
| Anti-rabbit IgG-HRP | #7074 | CST | Goat | x 4000 |
| Hoechst 33342 | SW150 | Dojindo |  | x 1000 |
| Alexa Fluor Plus 488 | A32723 | Invitrogen |  | x 1000 |
| Alexa Fluor® 568 | A11011 | Invitrogen |  | x 1000 |
| Mitotracker® | M7512 | Invitrogen |  | x 10000 |

CST, Cell Signaling Technology; Rb, rabbit; M, mouse
