# Supplementary material for: Nintedanib inhibits the VEGFR-ERK signaling pathway in human KRAS-mutated cancer cells
Source: Research Square preprint supplement (doi:10.21203/rs.3.rs-8370175/v1), 2025-12-18
Supplement: Supplementary file 8 [file d721c463b2850a07e1e6ca17.docx]

Table S2. Downregulated genes in *KRAS*G12D cells

| **Gene Name** | **Description** | **Fold change *KRAS*G12D VS parental** |
| --- | --- | --- |
| *FBXO25* | F-box protein 25 | 0.01 |
| *HAPLN1* | hyaluronan and proteoglycan link protein 1 | 0.01 |
| *GSTM3* | glutathione S-transferase mu 3 | 0.01 |
| *TIMP3* | TIMP metallopeptidase inhibitor 3 | 0.01 |
| *FEZ1* | fasciculation and elongation protein zeta 1 | 0.02 |
| *CDKN1C* | cyclin dependent kinase inhibitor 1C | 0.03 |
| *ALDH2* | aldehyde dehydrogenase 2 family member | 0.03 |
| *THY1* | Thy-1 cell surface antigen | 0.04 |
| *PTGFRN* | prostaglandin F2 receptor inhibitor | 0.05 |
| *KEAP1* | kelch like ECH associated protein 1 | 0.07 |
| *HLA-DPB1* | major histocompatibility complex, class II, DP beta 1 | 0.09 |
| *GOLGA5* | golgin A5 | 0.1 |
| *KRTAP1-5* | keratin associated protein 1-5 | 0.13 |
| *OPLAH* | 5-oxoprolinase, ATP-hydrolysing | 0.14 |
| *EFS* | embryonal Fyn-associated substrate | 0.15 |
| *IFI27* | interferon alpha inducible protein 27 | 0.15 |
| *PSG5* | pregnancy specific beta-1-glycoprotein 5 | 0.16 |
| *GMFG* | glia maturation factor gamma | 0.16 |
| *CAPZB* | capping actin protein of muscle Z-line subunit beta | 0.17 |
| *MIEF1* | mitochondrial elongation factor 1 | 0.18 |
| *LY6K* | lymphocyte antigen 6 family member K | 0.19 |

Downregulated genes by KRASG12D indicated based on the differential expression (fold change) in *KRAS*G12D cells versus parent cells (fold change<0.2)
